# Supplementary material for: Epidemiological trends of women’s cancers from 1990 to 2019 at the global, regional, and national levels: a population-based study
Source: PubMed Central journal article supplement (PMC8261911; doi:10.1186/s40364-021-00310-y), 2021-07-07
Supplement: 40364_2021_310_MOESM28_ESM.pdf [file 40364_2021_310_MOESM28_ESM.pdf]

**Table S13: The age-standardized rate of women's cancers in 204 countries or territories.**

| Measure | Region             | Rate             | Cancer          | Metric | Value       |
|---------|--------------------|------------------|-----------------|--------|-------------|
| Deaths  | Switzerland        | Age-standardized | Breast cancer   | Rate   | 17.84650727 |
| Deaths  | Switzerland        | Age-standardized | Cervical cancer | Rate   | 2.171463768 |
| Deaths  | Switzerland        | Age-standardized | Uterine cancer  | Rate   | 1.835799351 |
| Deaths  | Denmark            | Age-standardized | Breast cancer   | Rate   | 22.78609716 |
| Deaths  | Denmark            | Age-standardized | Cervical cancer | Rate   | 3.284950832 |
| Deaths  | Denmark            | Age-standardized | Uterine cancer  | Rate   | 2.757826493 |
| Deaths  | Denmark            | Age-standardized | Ovarian cancer  | Rate   | 8.112448938 |
| Deaths  | Costa Rica         | Age-standardized | Cervical cancer | Rate   | 7.217049638 |
| Deaths  | Costa Rica         | Age-standardized | Uterine cancer  | Rate   | 2.447059657 |
| Deaths  | Costa Rica         | Age-standardized | Ovarian cancer  | Rate   | 3.969312078 |
| Deaths  | Dominica           | Age-standardized | Breast cancer   | Rate   | 30.76798409 |
| Deaths  | Dominica           | Age-standardized | Cervical cancer | Rate   | 17.32926839 |
| Deaths  | Dominica           | Age-standardized | Uterine cancer  | Rate   | 4.632296822 |
| Deaths  | Dominica           | Age-standardized | Ovarian cancer  | Rate   | 3.319971624 |
| Deaths  | Finland            | Age-standardized | Breast cancer   | Rate   | 16.22268875 |
| Deaths  | Argentina          | Age-standardized | Breast cancer   | Rate   | 27.91723053 |
| Deaths  | Argentina          | Age-standardized | Cervical cancer | Rate   | 10.8523371  |
| Deaths  | Argentina          | Age-standardized | Uterine cancer  | Rate   | 2.582531916 |
| Deaths  | Sri Lanka          | Age-standardized | Uterine cancer  | Rate   | 1.756279933 |
| Deaths  | Sri Lanka          | Age-standardized | Ovarian cancer  | Rate   | 3.210482345 |
| Deaths  | Hungary            | Age-standardized | Cervical cancer | Rate   | 5.18322138  |
| Deaths  | Hungary            | Age-standardized | Uterine cancer  | Rate   | 3.24872949  |
| Deaths  | Myanmar            | Age-standardized | Ovarian cancer  | Rate   | 5.126541459 |
| Deaths  | Grenada            | Age-standardized | Breast cancer   | Rate   | 30.08152892 |
| Deaths  | Grenada            | Age-standardized | Cervical cancer | Rate   | 16.99680252 |
| Deaths  | Grenada            | Age-standardized | Uterine cancer  | Rate   | 11.30031632 |
| Deaths  | Guinea             | Age-standardized | Breast cancer   | Rate   | 19.16498781 |
| Deaths  | Guinea             | Age-standardized | Cervical cancer | Rate   | 36.15950609 |
| Deaths  | Guinea             | Age-standardized | Uterine cancer  | Rate   | 2.488234772 |
| Deaths  | France             | Age-standardized | Breast cancer   | Rate   | 19.94316228 |
| Deaths  | France             | Age-standardized | Cervical cancer | Rate   | 2.75099341  |
| Deaths  | France             | Age-standardized | Uterine cancer  | Rate   | 2.591447015 |
| Deaths  | Tokelau            | Age-standardized | Breast cancer   | Rate   | 33.67665097 |
| Deaths  | Tokelau            | Age-standardized | Cervical cancer | Rate   | 15.89147161 |
| Deaths  | Tokelau            | Age-standardized | Uterine cancer  | Rate   | 5.551663046 |
| Deaths  | Georgia            | Age-standardized | Ovarian cancer  | Rate   | 6.519170795 |
| Deaths  | Honduras           | Age-standardized | Ovarian cancer  | Rate   | 4.233661186 |
| Deaths  | Germany            | Age-standardized | Breast cancer   | Rate   | 21.03801771 |
| Deaths  | Germany            | Age-standardized | Cervical cancer | Rate   | 2.868800102 |
| Deaths  | Germany            | Age-standardized | Uterine cancer  | Rate   | 2.279226804 |
| Deaths  | Guyana             | Age-standardized | Breast cancer   | Rate   | 25.1572224  |
| Deaths  | Guyana             | Age-standardized | Cervical cancer | Rate   | 21.01409571 |
| Deaths  | Guyana             | Age-standardized | Uterine cancer  | Rate   | 6.899410244 |
| Deaths  | Guyana             | Age-standardized | Ovarian cancer  | Rate   | 8.065360932 |
| Deaths  | North Macedonia    | Age-standardized | Ovarian cancer  | Rate   | 6.933422824 |
| Deaths  | Germany            | Age-standardized | Ovarian cancer  | Rate   | 6.443472584 |
| Deaths  | Philippines        | Age-standardized | Breast cancer   | Rate   | 22.84784004 |
| Deaths  | Philippines        | Age-standardized | Cervical cancer | Rate   | 6.829867614 |
| Deaths  | Philippines        | Age-standardized | Uterine cancer  | Rate   | 2.58434344  |
| Deaths  | Philippines        | Age-standardized | Ovarian cancer  | Rate   | 5.820475121 |
| Deaths  | Grenada            | Age-standardized | Ovarian cancer  | Rate   | 7.63014339  |
| Deaths  | Ukraine            | Age-standardized | Breast cancer   | Rate   | 19.77370406 |
| Deaths  | Ukraine            | Age-standardized | Cervical cancer | Rate   | 5.234729171 |
| Deaths  | Ukraine            | Age-standardized | Uterine cancer  | Rate   | 3.886034813 |
| Deaths  | Dominican Republic | Age-standardized | Ovarian cancer  | Rate   | 1.700287209 |
| Deaths  | Greece             | Age-standardized | Ovarian cancer  | Rate   | 6.158459762 |

|        |                            |                  |                 |      |             |
|--------|----------------------------|------------------|-----------------|------|-------------|
| Deaths | Gabon                      | Age-standardized | Breast cancer   | Rate | 27.67939382 |
| Deaths | Gabon                      | Age-standardized | Cervical cancer | Rate | 16.72741228 |
| Deaths | Gabon                      | Age-standardized | Uterine cancer  | Rate | 2.444158627 |
| Deaths | Iraq                       | Age-standardized | Breast cancer   | Rate | 21.6388995  |
| Deaths | Iraq                       | Age-standardized | Cervical cancer | Rate | 2.400036938 |
| Deaths | Iraq                       | Age-standardized | Uterine cancer  | Rate | 1.915499222 |
| Deaths | Ukraine                    | Age-standardized | Ovarian cancer  | Rate | 6.317848969 |
| Deaths | Honduras                   | Age-standardized | Breast cancer   | Rate | 13.46534171 |
| Deaths | Honduras                   | Age-standardized | Cervical cancer | Rate | 11.1422268  |
| Deaths | Honduras                   | Age-standardized | Uterine cancer  | Rate | 4.33115182  |
| Deaths | Bangladesh                 | Age-standardized | Ovarian cancer  | Rate | 3.40416455  |
| Deaths | Guinea                     | Age-standardized | Ovarian cancer  | Rate | 4.16233876  |
| Deaths | Sri Lanka                  | Age-standardized | Breast cancer   | Rate | 12.13952957 |
| Deaths | Sri Lanka                  | Age-standardized | Cervical cancer | Rate | 3.601752772 |
| Deaths | Poland                     | Age-standardized | Breast cancer   | Rate | 19.2001756  |
| Deaths | Poland                     | Age-standardized | Cervical cancer | Rate | 5.948783418 |
| Deaths | Poland                     | Age-standardized | Uterine cancer  | Rate | 4.187941805 |
| Deaths | Jordan                     | Age-standardized | Ovarian cancer  | Rate | 3.571632265 |
| Deaths | Taiwan (Province of China) | Age-standardized | Breast cancer   | Rate | 11.57155619 |
| Deaths | Taiwan (Province of China) | Age-standardized | Cervical cancer | Rate | 5.001157801 |
| Deaths | Taiwan (Province of China) | Age-standardized | Uterine cancer  | Rate | 1.640188901 |
| Deaths | Taiwan (Province of China) | Age-standardized | Ovarian cancer  | Rate | 3.841079726 |
| Deaths | Thailand                   | Age-standardized | Ovarian cancer  | Rate | 3.774458145 |
| Deaths | Greece                     | Age-standardized | Breast cancer   | Rate | 21.64561221 |
| Deaths | Greece                     | Age-standardized | Cervical cancer | Rate | 2.958011216 |
| Deaths | Greece                     | Age-standardized | Uterine cancer  | Rate | 2.667131877 |
| Deaths | Tokelau                    | Age-standardized | Ovarian cancer  | Rate | 3.90421693  |
| Deaths | Zambia                     | Age-standardized | Ovarian cancer  | Rate | 5.762741842 |
| Deaths | Djibouti                   | Age-standardized | Ovarian cancer  | Rate | 5.87482284  |
| Deaths | Ghana                      | Age-standardized | Breast cancer   | Rate | 30.3191249  |
| Deaths | Ghana                      | Age-standardized | Cervical cancer | Rate | 16.93832128 |
| Deaths | Ghana                      | Age-standardized | Uterine cancer  | Rate | 2.663465487 |
| Deaths | Thailand                   | Age-standardized | Breast cancer   | Rate | 12.41038108 |
| Deaths | Thailand                   | Age-standardized | Cervical cancer | Rate | 6.732353515 |
| Deaths | Thailand                   | Age-standardized | Uterine cancer  | Rate | 1.128425055 |
| Deaths | Finland                    | Age-standardized | Cervical cancer | Rate | 1.782280419 |
| Deaths | Finland                    | Age-standardized | Uterine cancer  | Rate | 3.059610582 |
| Deaths | Finland                    | Age-standardized | Ovarian cancer  | Rate | 6.748990188 |
| Deaths | Burundi                    | Age-standardized | Breast cancer   | Rate | 16.16204949 |
| Deaths | Burundi                    | Age-standardized | Cervical cancer | Rate | 25.33787821 |
| Deaths | Burundi                    | Age-standardized | Uterine cancer  | Rate | 2.441690904 |
| Deaths | Burundi                    | Age-standardized | Ovarian cancer  | Rate | 3.702335155 |
| Deaths | Armenia                    | Age-standardized | Breast cancer   | Rate | 23.94669154 |
| Deaths | Armenia                    | Age-standardized | Cervical cancer | Rate | 7.093659981 |
| Deaths | Armenia                    | Age-standardized | Uterine cancer  | Rate | 3.745445088 |
| Deaths | Armenia                    | Age-standardized | Ovarian cancer  | Rate | 5.248921368 |
| Deaths | Montenegro                 | Age-standardized | Breast cancer   | Rate | 26.3663292  |
| Deaths | Montenegro                 | Age-standardized | Cervical cancer | Rate | 4.837567031 |
| Deaths | Montenegro                 | Age-standardized | Uterine cancer  | Rate | 2.981877249 |
| Deaths | France                     | Age-standardized | Ovarian cancer  | Rate | 6.065032023 |
| Deaths | Timor-Leste                | Age-standardized | Uterine cancer  | Rate | 2.830448787 |
| Deaths | Timor-Leste                | Age-standardized | Ovarian cancer  | Rate | 3.610404413 |
| Deaths | Switzerland                | Age-standardized | Ovarian cancer  | Rate | 5.414584994 |
| Deaths | Haiti                      | Age-standardized | Breast cancer   | Rate | 28.78741927 |
| Deaths | Haiti                      | Age-standardized | Cervical cancer | Rate | 27.76420641 |
| Deaths | Haiti                      | Age-standardized | Uterine cancer  | Rate | 5.800654046 |
| Deaths | El Salvador                | Age-standardized | Breast cancer   | Rate | 10.75942053 |
| Deaths | El Salvador                | Age-standardized | Cervical cancer | Rate | 15.26290371 |

|        |                                       |                  |                 |      |             |
|--------|---------------------------------------|------------------|-----------------|------|-------------|
| Deaths | El Salvador                           | Age-standardized | Uterine cancer  | Rate | 2.252332615 |
| Deaths | Dominican Republic                    | Age-standardized | Breast cancer   | Rate | 15.90309524 |
| Deaths | Dominican Republic                    | Age-standardized | Cervical cancer | Rate | 13.31250759 |
| Deaths | Dominican Republic                    | Age-standardized | Uterine cancer  | Rate | 5.507361695 |
| Deaths | Iraq                                  | Age-standardized | Ovarian cancer  | Rate | 3.749275198 |
| Deaths | Timor-Leste                           | Age-standardized | Breast cancer   | Rate | 16.25730326 |
| Deaths | Timor-Leste                           | Age-standardized | Cervical cancer | Rate | 9.03078111  |
| Deaths | North Macedonia                       | Age-standardized | Breast cancer   | Rate | 26.46066957 |
| Deaths | North Macedonia                       | Age-standardized | Cervical cancer | Rate | 6.117320361 |
| Deaths | North Macedonia                       | Age-standardized | Uterine cancer  | Rate | 5.141941935 |
| Deaths | Sudan                                 | Age-standardized | Cervical cancer | Rate | 3.265785895 |
| Deaths | Sudan                                 | Age-standardized | Uterine cancer  | Rate | 0.982310315 |
| Deaths | Sudan                                 | Age-standardized | Ovarian cancer  | Rate | 2.176256717 |
| Deaths | Djibouti                              | Age-standardized | Breast cancer   | Rate | 20.0132588  |
| Deaths | Gambia                                | Age-standardized | Breast cancer   | Rate | 12.14796221 |
| Deaths | Gambia                                | Age-standardized | Cervical cancer | Rate | 16.69350151 |
| Deaths | Gambia                                | Age-standardized | Uterine cancer  | Rate | 1.846627605 |
| Deaths | Gambia                                | Age-standardized | Ovarian cancer  | Rate | 3.426276694 |
| Deaths | Azerbaijan                            | Age-standardized | Breast cancer   | Rate | 17.79297727 |
| Deaths | Azerbaijan                            | Age-standardized | Cervical cancer | Rate | 6.037520093 |
| Deaths | Azerbaijan                            | Age-standardized | Uterine cancer  | Rate | 3.017375614 |
| Deaths | Azerbaijan                            | Age-standardized | Ovarian cancer  | Rate | 3.547530464 |
| Deaths | Montenegro                            | Age-standardized | Ovarian cancer  | Rate | 5.744561799 |
| Deaths | El Salvador                           | Age-standardized | Ovarian cancer  | Rate | 3.948693126 |
| Deaths | Djibouti                              | Age-standardized | Cervical cancer | Rate | 21.76946022 |
| Deaths | Djibouti                              | Age-standardized | Uterine cancer  | Rate | 2.99280337  |
| Deaths | Czechia                               | Age-standardized | Ovarian cancer  | Rate | 7.422919149 |
| Deaths | Iran (Islamic Republic of)            | Age-standardized | Breast cancer   | Rate | 11.85795357 |
| Deaths | Iran (Islamic Republic of)            | Age-standardized | Cervical cancer | Rate | 2.063045532 |
| Deaths | Iran (Islamic Republic of)            | Age-standardized | Uterine cancer  | Rate | 0.979372421 |
| Deaths | Democratic People's Republic of Korea | Age-standardized | Breast cancer   | Rate | 12.99589667 |
| Deaths | Democratic People's Republic of Korea | Age-standardized | Cervical cancer | Rate | 8.28113865  |
| Deaths | Democratic People's Republic of Korea | Age-standardized | Uterine cancer  | Rate | 1.998351136 |
| Deaths | Democratic People's Republic of Korea | Age-standardized | Ovarian cancer  | Rate | 2.666978463 |
| Deaths | Republic of Korea                     | Age-standardized | Breast cancer   | Rate | 8.725512741 |
| Deaths | Republic of Korea                     | Age-standardized | Cervical cancer | Rate | 2.724707489 |
| Deaths | Republic of Korea                     | Age-standardized | Uterine cancer  | Rate | 0.770229668 |
| Deaths | Saint Kitts and Nevis                 | Age-standardized | Breast cancer   | Rate | 29.99714133 |
| Deaths | Saint Kitts and Nevis                 | Age-standardized | Cervical cancer | Rate | 14.69853961 |
| Deaths | Saint Kitts and Nevis                 | Age-standardized | Uterine cancer  | Rate | 6.627519346 |
| Deaths | Saint Kitts and Nevis                 | Age-standardized | Ovarian cancer  | Rate | 7.119487147 |
| Deaths | Kuwait                                | Age-standardized | Breast cancer   | Rate | 13.01031731 |
| Deaths | Kuwait                                | Age-standardized | Cervical cancer | Rate | 1.762253195 |
| Deaths | Kuwait                                | Age-standardized | Uterine cancer  | Rate | 2.213464759 |
| Deaths | Kuwait                                | Age-standardized | Ovarian cancer  | Rate | 3.690758339 |
| Deaths | United Kingdom                        | Age-standardized | Breast cancer   | Rate | 22.57904825 |
| Deaths | United Kingdom                        | Age-standardized | Cervical cancer | Rate | 2.893690179 |
| Deaths | United Kingdom                        | Age-standardized | Uterine cancer  | Rate | 3.227961787 |
| Deaths | Russian Federation                    | Age-standardized | Ovarian cancer  | Rate | 6.893617066 |
| Deaths | Hungary                               | Age-standardized | Breast cancer   | Rate | 20.06161349 |
| Deaths | Ghana                                 | Age-standardized | Ovarian cancer  | Rate | 3.715251873 |
| Deaths | Costa Rica                            | Age-standardized | Breast cancer   | Rate | 15.46431732 |
| Deaths | Myanmar                               | Age-standardized | Breast cancer   | Rate | 16.77997474 |
| Deaths | Jamaica                               | Age-standardized | Ovarian cancer  | Rate | 5.471229964 |
| Deaths | Afghanistan                           | Age-standardized | Breast cancer   | Rate | 16.46526992 |
| Deaths | Afghanistan                           | Age-standardized | Cervical cancer | Rate | 7.587224657 |
| Deaths | Afghanistan                           | Age-standardized | Uterine cancer  | Rate | 1.872858457 |
| Deaths | Poland                                | Age-standardized | Ovarian cancer  | Rate | 9.051302344 |

|        |                            |                  |                 |      |             |
|--------|----------------------------|------------------|-----------------|------|-------------|
| Deaths | Brunei Darussalam          | Age-standardized | Breast cancer   | Rate | 22.90173343 |
| Deaths | Brunei Darussalam          | Age-standardized | Cervical cancer | Rate | 10.45980634 |
| Deaths | Brunei Darussalam          | Age-standardized | Uterine cancer  | Rate | 2.812662816 |
| Deaths | Brunei Darussalam          | Age-standardized | Ovarian cancer  | Rate | 10.07653606 |
| Deaths | Cambodia                   | Age-standardized | Breast cancer   | Rate | 13.86301781 |
| Deaths | Cambodia                   | Age-standardized | Cervical cancer | Rate | 9.673025555 |
| Deaths | Cambodia                   | Age-standardized | Uterine cancer  | Rate | 3.031088091 |
| Deaths | United Kingdom             | Age-standardized | Ovarian cancer  | Rate | 8.001275045 |
| Deaths | Hungary                    | Age-standardized | Ovarian cancer  | Rate | 7.381891279 |
| Deaths | Guatemala                  | Age-standardized | Breast cancer   | Rate | 10.60969113 |
| Deaths | China                      | Age-standardized | Ovarian cancer  | Rate | 2.768822525 |
| Deaths | Uganda                     | Age-standardized | Breast cancer   | Rate | 22.41880556 |
| Deaths | Uganda                     | Age-standardized | Cervical cancer | Rate | 24.29390301 |
| Deaths | Uganda                     | Age-standardized | Uterine cancer  | Rate | 4.084965453 |
| Deaths | Libya                      | Age-standardized | Ovarian cancer  | Rate | 5.137396132 |
| Deaths | Czechia                    | Age-standardized | Breast cancer   | Rate | 16.30608298 |
| Deaths | Czechia                    | Age-standardized | Cervical cancer | Rate | 4.348690783 |
| Deaths | Czechia                    | Age-standardized | Uterine cancer  | Rate | 3.622140006 |
| Deaths | Uganda                     | Age-standardized | Ovarian cancer  | Rate | 6.936961245 |
| Deaths | Liberia                    | Age-standardized | Breast cancer   | Rate | 18.76020462 |
| Deaths | San Marino                 | Age-standardized | Breast cancer   | Rate | 19.51734187 |
| Deaths | San Marino                 | Age-standardized | Cervical cancer | Rate | 2.347408825 |
| Deaths | San Marino                 | Age-standardized | Uterine cancer  | Rate | 0.826591911 |
| Deaths | San Marino                 | Age-standardized | Ovarian cancer  | Rate | 4.35609681  |
| Deaths | Eritrea                    | Age-standardized | Breast cancer   | Rate | 22.5040746  |
| Deaths | Eritrea                    | Age-standardized | Cervical cancer | Rate | 30.25783157 |
| Deaths | Slovakia                   | Age-standardized | Breast cancer   | Rate | 18.73728354 |
| Deaths | Slovakia                   | Age-standardized | Cervical cancer | Rate | 5.187661992 |
| Deaths | Slovakia                   | Age-standardized | Uterine cancer  | Rate | 4.513042473 |
| Deaths | Myanmar                    | Age-standardized | Cervical cancer | Rate | 7.727019655 |
| Deaths | Myanmar                    | Age-standardized | Uterine cancer  | Rate | 2.623513642 |
| Deaths | Indonesia                  | Age-standardized | Breast cancer   | Rate | 20.47290211 |
| Deaths | Indonesia                  | Age-standardized | Cervical cancer | Rate | 7.079926521 |
| Deaths | Indonesia                  | Age-standardized | Uterine cancer  | Rate | 2.864262605 |
| Deaths | Indonesia                  | Age-standardized | Ovarian cancer  | Rate | 5.07702734  |
| Deaths | Iran (Islamic Republic of) | Age-standardized | Ovarian cancer  | Rate | 3.031104679 |
| Deaths | Liberia                    | Age-standardized | Cervical cancer | Rate | 20.48819094 |
| Deaths | Liberia                    | Age-standardized | Uterine cancer  | Rate | 2.388183939 |
| Deaths | Liberia                    | Age-standardized | Ovarian cancer  | Rate | 3.485383713 |
| Deaths | Viet Nam                   | Age-standardized | Breast cancer   | Rate | 21.53585864 |
| Deaths | Viet Nam                   | Age-standardized | Cervical cancer | Rate | 8.801855612 |
| Deaths | Viet Nam                   | Age-standardized | Uterine cancer  | Rate | 1.306128251 |
| Deaths | Slovakia                   | Age-standardized | Ovarian cancer  | Rate | 6.514520983 |
| Deaths | Guatemala                  | Age-standardized | Cervical cancer | Rate | 18.44083736 |
| Deaths | Guatemala                  | Age-standardized | Uterine cancer  | Rate | 2.809584807 |
| Deaths | Guatemala                  | Age-standardized | Ovarian cancer  | Rate | 3.277217838 |
| Deaths | Argentina                  | Age-standardized | Ovarian cancer  | Rate | 5.996782556 |
| Deaths | Nepal                      | Age-standardized | Ovarian cancer  | Rate | 4.595725871 |
| Deaths | Romania                    | Age-standardized | Ovarian cancer  | Rate | 6.421008068 |
| Deaths | Morocco                    | Age-standardized | Breast cancer   | Rate | 24.40817574 |
| Deaths | Morocco                    | Age-standardized | Cervical cancer | Rate | 7.825463337 |
| Deaths | Morocco                    | Age-standardized | Uterine cancer  | Rate | 1.714034433 |
| Deaths | Iceland                    | Age-standardized | Breast cancer   | Rate | 14.21747802 |
| Deaths | Iceland                    | Age-standardized | Cervical cancer | Rate | 1.90491987  |
| Deaths | Iceland                    | Age-standardized | Uterine cancer  | Rate | 1.599175705 |
| Deaths | Jordan                     | Age-standardized | Breast cancer   | Rate | 19.88524146 |
| Deaths | Jordan                     | Age-standardized | Cervical cancer | Rate | 2.040605575 |
| Deaths | Jordan                     | Age-standardized | Uterine cancer  | Rate | 2.074784719 |

|        |                   |                  |                 |      |             |
|--------|-------------------|------------------|-----------------|------|-------------|
| Deaths | Israel            | Age-standardized | Ovarian cancer  | Rate | 6.13287567  |
| Deaths | Cook Islands      | Age-standardized | Breast cancer   | Rate | 38.23868375 |
| Deaths | Cook Islands      | Age-standardized | Cervical cancer | Rate | 3.906164256 |
| Deaths | Cook Islands      | Age-standardized | Uterine cancer  | Rate | 1.879608474 |
| Deaths | China             | Age-standardized | Breast cancer   | Rate | 9.016081197 |
| Deaths | China             | Age-standardized | Cervical cancer | Rate | 5.128984191 |
| Deaths | China             | Age-standardized | Uterine cancer  | Rate | 1.170899806 |
| Deaths | Republic of Korea | Age-standardized | Ovarian cancer  | Rate | 2.906022149 |
| Deaths | Fiji              | Age-standardized | Breast cancer   | Rate | 37.08389576 |
| Deaths | Fiji              | Age-standardized | Cervical cancer | Rate | 22.0981588  |
| Deaths | Fiji              | Age-standardized | Uterine cancer  | Rate | 4.700691838 |
| Deaths | Iceland           | Age-standardized | Ovarian cancer  | Rate | 5.435901479 |
| Deaths | Kyrgyzstan        | Age-standardized | Breast cancer   | Rate | 10.7994039  |
| Deaths | Kyrgyzstan        | Age-standardized | Cervical cancer | Rate | 8.942064464 |
| Deaths | Kyrgyzstan        | Age-standardized | Uterine cancer  | Rate | 2.78669123  |
| Deaths | Kyrgyzstan        | Age-standardized | Ovarian cancer  | Rate | 4.744638123 |
| Deaths | Comoros           | Age-standardized | Breast cancer   | Rate | 19.66397022 |
| Deaths | Comoros           | Age-standardized | Cervical cancer | Rate | 22.16640055 |
| Deaths | Comoros           | Age-standardized | Uterine cancer  | Rate | 2.881116224 |
| Deaths | Comoros           | Age-standardized | Ovarian cancer  | Rate | 6.454545862 |
| Deaths | Afghanistan       | Age-standardized | Ovarian cancer  | Rate | 2.83450339  |
| Deaths | Eritrea           | Age-standardized | Uterine cancer  | Rate | 3.385026884 |
| Deaths | Eritrea           | Age-standardized | Ovarian cancer  | Rate | 5.217354891 |
| Deaths | Viet Nam          | Age-standardized | Ovarian cancer  | Rate | 4.256578025 |
| Deaths | Lebanon           | Age-standardized | Breast cancer   | Rate | 35.48805051 |
| Deaths | American Samoa    | Age-standardized | Breast cancer   | Rate | 31.76938982 |
| Deaths | American Samoa    | Age-standardized | Cervical cancer | Rate | 9.587496118 |
| Deaths | Cook Islands      | Age-standardized | Ovarian cancer  | Rate | 2.819958321 |
| Deaths | Haiti             | Age-standardized | Ovarian cancer  | Rate | 3.407751944 |
| Deaths | Bhutan            | Age-standardized | Breast cancer   | Rate | 12.02170417 |
| Deaths | Bhutan            | Age-standardized | Cervical cancer | Rate | 7.241662728 |
| Deaths | Bhutan            | Age-standardized | Uterine cancer  | Rate | 1.459789303 |
| Deaths | Kenya             | Age-standardized | Breast cancer   | Rate | 17.04735021 |
| Deaths | Kenya             | Age-standardized | Cervical cancer | Rate | 12.92230054 |
| Deaths | Kenya             | Age-standardized | Uterine cancer  | Rate | 1.448521287 |
| Deaths | Italy             | Age-standardized | Breast cancer   | Rate | 18.46881125 |
| Deaths | Italy             | Age-standardized | Cervical cancer | Rate | 2.232132925 |
| Deaths | Pakistan          | Age-standardized | Breast cancer   | Rate | 51.93970127 |
| Deaths | Pakistan          | Age-standardized | Cervical cancer | Rate | 4.553542623 |
| Deaths | Pakistan          | Age-standardized | Uterine cancer  | Rate | 4.857371123 |
| Deaths | Namibia           | Age-standardized | Breast cancer   | Rate | 29.67784561 |
| Deaths | Namibia           | Age-standardized | Cervical cancer | Rate | 16.38284463 |
| Deaths | Kenya             | Age-standardized | Ovarian cancer  | Rate | 4.669726244 |
| Deaths | Georgia           | Age-standardized | Breast cancer   | Rate | 27.97941027 |
| Deaths | Georgia           | Age-standardized | Cervical cancer | Rate | 7.751486475 |
| Deaths | Georgia           | Age-standardized | Uterine cancer  | Rate | 5.796448698 |
| Deaths | Tajikistan        | Age-standardized | Breast cancer   | Rate | 15.17498871 |
| Deaths | Tajikistan        | Age-standardized | Cervical cancer | Rate | 4.679838994 |
| Deaths | Tajikistan        | Age-standardized | Uterine cancer  | Rate | 3.913564587 |
| Deaths | Suriname          | Age-standardized | Ovarian cancer  | Rate | 6.091274219 |
| Deaths | Guinea-Bissau     | Age-standardized | Breast cancer   | Rate | 22.27846228 |
| Deaths | Guinea-Bissau     | Age-standardized | Cervical cancer | Rate | 29.28376945 |
| Deaths | Guinea-Bissau     | Age-standardized | Uterine cancer  | Rate | 2.902951627 |
| Deaths | Guinea-Bissau     | Age-standardized | Ovarian cancer  | Rate | 3.299650275 |
| Deaths | American Samoa    | Age-standardized | Uterine cancer  | Rate | 10.74137878 |
| Deaths | Uruguay           | Age-standardized | Breast cancer   | Rate | 29.96992838 |
| Deaths | Uruguay           | Age-standardized | Cervical cancer | Rate | 8.44932119  |
| Deaths | Uruguay           | Age-standardized | Uterine cancer  | Rate | 2.433790445 |

|        |                     |                  |                 |      |             |
|--------|---------------------|------------------|-----------------|------|-------------|
| Deaths | Uruguay             | Age-standardized | Ovarian cancer  | Rate | 6.446010603 |
| Deaths | Ireland             | Age-standardized | Breast cancer   | Rate | 20.51090556 |
| Deaths | Ireland             | Age-standardized | Cervical cancer | Rate | 2.812871478 |
| Deaths | Ireland             | Age-standardized | Uterine cancer  | Rate | 2.669854454 |
| Deaths | Ireland             | Age-standardized | Ovarian cancer  | Rate | 8.018936107 |
| Deaths | Singapore           | Age-standardized | Ovarian cancer  | Rate | 4.056095028 |
| Deaths | American Samoa      | Age-standardized | Ovarian cancer  | Rate | 10.00060854 |
| Deaths | Nicaragua           | Age-standardized | Breast cancer   | Rate | 12.0684128  |
| Deaths | Nicaragua           | Age-standardized | Cervical cancer | Rate | 16.73705958 |
| Deaths | Nicaragua           | Age-standardized | Uterine cancer  | Rate | 1.645532674 |
| Deaths | Botswana            | Age-standardized | Breast cancer   | Rate | 28.63248512 |
| Deaths | Botswana            | Age-standardized | Cervical cancer | Rate | 26.69892504 |
| Deaths | Botswana            | Age-standardized | Uterine cancer  | Rate | 3.665962547 |
| Deaths | Zambia              | Age-standardized | Breast cancer   | Rate | 19.47023809 |
| Deaths | Zambia              | Age-standardized | Cervical cancer | Rate | 26.41613289 |
| Deaths | Zambia              | Age-standardized | Uterine cancer  | Rate | 3.092779169 |
| Deaths | Mali                | Age-standardized | Breast cancer   | Rate | 16.91627421 |
| Deaths | Mali                | Age-standardized | Cervical cancer | Rate | 18.41987152 |
| Deaths | Mali                | Age-standardized | Uterine cancer  | Rate | 1.721172497 |
| Deaths | Tuvalu              | Age-standardized | Breast cancer   | Rate | 35.11702098 |
| Deaths | Tuvalu              | Age-standardized | Cervical cancer | Rate | 16.85162496 |
| Deaths | Tuvalu              | Age-standardized | Uterine cancer  | Rate | 5.470785924 |
| Deaths | Tuvalu              | Age-standardized | Ovarian cancer  | Rate | 4.495814845 |
| Deaths | Mali                | Age-standardized | Ovarian cancer  | Rate | 1.932350405 |
| Deaths | Romania             | Age-standardized | Breast cancer   | Rate | 18.47458536 |
| Deaths | Romania             | Age-standardized | Cervical cancer | Rate | 10.95874651 |
| Deaths | Romania             | Age-standardized | Uterine cancer  | Rate | 2.89134055  |
| Deaths | Serbia              | Age-standardized | Breast cancer   | Rate | 29.10124091 |
| Deaths | Serbia              | Age-standardized | Cervical cancer | Rate | 8.534154287 |
| Deaths | Serbia              | Age-standardized | Uterine cancer  | Rate | 4.192776114 |
| Deaths | Lebanon             | Age-standardized | Cervical cancer | Rate | 2.430910702 |
| Deaths | Lebanon             | Age-standardized | Uterine cancer  | Rate | 2.562867168 |
| Deaths | Lebanon             | Age-standardized | Ovarian cancer  | Rate | 7.500199132 |
| Deaths | Chile               | Age-standardized | Ovarian cancer  | Rate | 4.663012713 |
| Deaths | India               | Age-standardized | Breast cancer   | Rate | 13.66958166 |
| Deaths | India               | Age-standardized | Cervical cancer | Rate | 7.379379102 |
| Deaths | India               | Age-standardized | Uterine cancer  | Rate | 1.236005009 |
| Deaths | India               | Age-standardized | Ovarian cancer  | Rate | 3.781848409 |
| Deaths | Botswana            | Age-standardized | Ovarian cancer  | Rate | 5.881431584 |
| Deaths | Jamaica             | Age-standardized | Breast cancer   | Rate | 29.31377356 |
| Deaths | Serbia              | Age-standardized | Ovarian cancer  | Rate | 7.928190476 |
| Deaths | Israel              | Age-standardized | Breast cancer   | Rate | 21.47022962 |
| Deaths | Israel              | Age-standardized | Cervical cancer | Rate | 2.529585051 |
| Deaths | Israel              | Age-standardized | Uterine cancer  | Rate | 2.722881302 |
| Deaths | Japan               | Age-standardized | Breast cancer   | Rate | 10.14253761 |
| Deaths | Japan               | Age-standardized | Cervical cancer | Rate | 2.780009285 |
| Deaths | Japan               | Age-standardized | Uterine cancer  | Rate | 1.702793384 |
| Deaths | Japan               | Age-standardized | Ovarian cancer  | Rate | 3.676990834 |
| Deaths | Bhutan              | Age-standardized | Ovarian cancer  | Rate | 5.130660314 |
| Deaths | Bangladesh          | Age-standardized | Breast cancer   | Rate | 14.54072507 |
| Deaths | Bangladesh          | Age-standardized | Cervical cancer | Rate | 5.672332014 |
| Deaths | Bangladesh          | Age-standardized | Uterine cancer  | Rate | 0.927151148 |
| Deaths | Namibia             | Age-standardized | Uterine cancer  | Rate | 2.296529042 |
| Deaths | Belarus             | Age-standardized | Breast cancer   | Rate | 14.00790234 |
| Deaths | Belarus             | Age-standardized | Cervical cancer | Rate | 5.895556383 |
| Deaths | Belarus             | Age-standardized | Uterine cancer  | Rate | 2.237738719 |
| Deaths | Nicaragua           | Age-standardized | Ovarian cancer  | Rate | 3.670133972 |
| Deaths | Trinidad and Tobago | Age-standardized | Breast cancer   | Rate | 23.69074233 |

|        |                                  |                  |                 |      |             |
|--------|----------------------------------|------------------|-----------------|------|-------------|
| Deaths | Trinidad and Tobago              | Age-standardized | Cervical cancer | Rate | 11.55376895 |
| Deaths | Trinidad and Tobago              | Age-standardized | Uterine cancer  | Rate | 6.383031003 |
| Deaths | Jamaica                          | Age-standardized | Cervical cancer | Rate | 15.89674166 |
| Deaths | Jamaica                          | Age-standardized | Uterine cancer  | Rate | 7.038747985 |
| Deaths | Chile                            | Age-standardized | Breast cancer   | Rate | 13.93371495 |
| Deaths | Chile                            | Age-standardized | Cervical cancer | Rate | 7.188942445 |
| Deaths | Chile                            | Age-standardized | Uterine cancer  | Rate | 1.986500491 |
| Deaths | Belarus                          | Age-standardized | Ovarian cancer  | Rate | 5.71991815  |
| Deaths | Panama                           | Age-standardized | Uterine cancer  | Rate | 2.68191112  |
| Deaths | Saint Vincent and the Grenadines | Age-standardized | Breast cancer   | Rate | 30.73418266 |
| Deaths | Saint Vincent and the Grenadines | Age-standardized | Cervical cancer | Rate | 20.61380681 |
| Deaths | Saint Vincent and the Grenadines | Age-standardized | Uterine cancer  | Rate | 8.079035634 |
| Deaths | Cambodia                         | Age-standardized | Ovarian cancer  | Rate | 5.26245142  |
| Deaths | Mexico                           | Age-standardized | Breast cancer   | Rate | 12.48117345 |
| Deaths | Mexico                           | Age-standardized | Cervical cancer | Rate | 9.525403734 |
| Deaths | Mexico                           | Age-standardized | Uterine cancer  | Rate | 1.471743403 |
| Deaths | Singapore                        | Age-standardized | Breast cancer   | Rate | 12.66282603 |
| Deaths | Singapore                        | Age-standardized | Cervical cancer | Rate | 2.620830724 |
| Deaths | Singapore                        | Age-standardized | Uterine cancer  | Rate | 1.919667272 |
| Deaths | Saint Vincent and the Grenadines | Age-standardized | Ovarian cancer  | Rate | 6.163687511 |
| Deaths | Australia                        | Age-standardized | Breast cancer   | Rate | 17.09350551 |
| Deaths | Australia                        | Age-standardized | Cervical cancer | Rate | 2.138781684 |
| Deaths | Australia                        | Age-standardized | Uterine cancer  | Rate | 2.276118465 |
| Deaths | Niger                            | Age-standardized | Breast cancer   | Rate | 11.16287532 |
| Deaths | Niger                            | Age-standardized | Cervical cancer | Rate | 23.61912921 |
| Deaths | Niger                            | Age-standardized | Uterine cancer  | Rate | 2.116601774 |
| Deaths | Qatar                            | Age-standardized | Breast cancer   | Rate | 36.9065233  |
| Deaths | Qatar                            | Age-standardized | Cervical cancer | Rate | 5.033796014 |
| Deaths | Qatar                            | Age-standardized | Uterine cancer  | Rate | 2.507204893 |
| Deaths | Maldives                         | Age-standardized | Ovarian cancer  | Rate | 5.598872212 |
| Deaths | Ethiopia                         | Age-standardized | Breast cancer   | Rate | 17.35910086 |
| Deaths | Ethiopia                         | Age-standardized | Cervical cancer | Rate | 16.81822449 |
| Deaths | Ethiopia                         | Age-standardized | Uterine cancer  | Rate | 1.856864296 |
| Deaths | Marshall Islands                 | Age-standardized | Breast cancer   | Rate | 39.6328254  |
| Deaths | Marshall Islands                 | Age-standardized | Cervical cancer | Rate | 21.42314099 |
| Deaths | Marshall Islands                 | Age-standardized | Uterine cancer  | Rate | 6.658310683 |
| Deaths | Niger                            | Age-standardized | Ovarian cancer  | Rate | 1.720592204 |
| Deaths | Qatar                            | Age-standardized | Ovarian cancer  | Rate | 8.191749891 |
| Deaths | Mauritania                       | Age-standardized | Breast cancer   | Rate | 18.10091609 |
| Deaths | Mauritania                       | Age-standardized | Cervical cancer | Rate | 18.06783347 |
| Deaths | Mauritania                       | Age-standardized | Uterine cancer  | Rate | 2.666023989 |
| Deaths | Ethiopia                         | Age-standardized | Ovarian cancer  | Rate | 4.194989928 |
| Deaths | Libya                            | Age-standardized | Breast cancer   | Rate | 17.21732508 |
| Deaths | Libya                            | Age-standardized | Cervical cancer | Rate | 4.019961046 |
| Deaths | Marshall Islands                 | Age-standardized | Ovarian cancer  | Rate | 4.959985046 |
| Deaths | United States Virgin Islands     | Age-standardized | Breast cancer   | Rate | 28.08871223 |
| Deaths | United States Virgin Islands     | Age-standardized | Cervical cancer | Rate | 7.766556509 |
| Deaths | United States Virgin Islands     | Age-standardized | Uterine cancer  | Rate | 4.043475619 |
| Deaths | Sudan                            | Age-standardized | Breast cancer   | Rate | 13.11441081 |
| Deaths | Libya                            | Age-standardized | Uterine cancer  | Rate | 1.877479439 |
| Deaths | Panama                           | Age-standardized | Breast cancer   | Rate | 13.50941218 |
| Deaths | Panama                           | Age-standardized | Cervical cancer | Rate | 10.01850775 |
| Deaths | Bermuda                          | Age-standardized | Breast cancer   | Rate | 19.33202054 |
| Deaths | Bermuda                          | Age-standardized | Cervical cancer | Rate | 3.250624694 |
| Deaths | Bermuda                          | Age-standardized | Uterine cancer  | Rate | 3.172806242 |
| Deaths | Netherlands                      | Age-standardized | Breast cancer   | Rate | 24.13204431 |
| Deaths | Netherlands                      | Age-standardized | Cervical cancer | Rate | 2.252661813 |
| Deaths | Netherlands                      | Age-standardized | Uterine cancer  | Rate | 3.027386158 |

|        |                                  |                  |                 |      |             |
|--------|----------------------------------|------------------|-----------------|------|-------------|
| Deaths | Fiji                             | Age-standardized | Ovarian cancer  | Rate | 1.930208284 |
| Deaths | Kazakhstan                       | Age-standardized | Breast cancer   | Rate | 16.30489815 |
| Deaths | Kazakhstan                       | Age-standardized | Cervical cancer | Rate | 7.645432295 |
| Deaths | Kazakhstan                       | Age-standardized | Uterine cancer  | Rate | 3.273936869 |
| Deaths | Kazakhstan                       | Age-standardized | Ovarian cancer  | Rate | 6.399166192 |
| Deaths | Australia                        | Age-standardized | Ovarian cancer  | Rate | 5.177925175 |
| Deaths | Panama                           | Age-standardized | Ovarian cancer  | Rate | 3.912871424 |
| Deaths | United States Virgin Islands     | Age-standardized | Ovarian cancer  | Rate | 9.835831105 |
| Deaths | United States of America         | Age-standardized | Ovarian cancer  | Rate | 6.470711588 |
| Deaths | Italy                            | Age-standardized | Uterine cancer  | Rate | 2.241509883 |
| Deaths | Malaysia                         | Age-standardized | Breast cancer   | Rate | 25.81352243 |
| Deaths | Malaysia                         | Age-standardized | Cervical cancer | Rate | 9.001530819 |
| Deaths | Malaysia                         | Age-standardized | Uterine cancer  | Rate | 2.607403347 |
| Deaths | Malaysia                         | Age-standardized | Ovarian cancer  | Rate | 4.768938203 |
| Deaths | Mexico                           | Age-standardized | Ovarian cancer  | Rate | 5.214789316 |
| Deaths | Saint Lucia                      | Age-standardized | Breast cancer   | Rate | 21.73374047 |
| Deaths | Saint Lucia                      | Age-standardized | Cervical cancer | Rate | 13.50340296 |
| Deaths | Saint Lucia                      | Age-standardized | Uterine cancer  | Rate | 4.560100258 |
| Deaths | Saint Lucia                      | Age-standardized | Ovarian cancer  | Rate | 6.136216586 |
| Deaths | Bermuda                          | Age-standardized | Ovarian cancer  | Rate | 6.313162134 |
| Deaths | Turkmenistan                     | Age-standardized | Cervical cancer | Rate | 7.178267892 |
| Deaths | Turkmenistan                     | Age-standardized | Uterine cancer  | Rate | 0.907907323 |
| Deaths | Turkmenistan                     | Age-standardized | Ovarian cancer  | Rate | 3.149710769 |
| Deaths | Micronesia (Federated States of) | Age-standardized | Breast cancer   | Rate | 42.13290467 |
| Deaths | Micronesia (Federated States of) | Age-standardized | Cervical cancer | Rate | 19.93962777 |
| Deaths | Micronesia (Federated States of) | Age-standardized | Uterine cancer  | Rate | 7.018097163 |
| Deaths | Italy                            | Age-standardized | Ovarian cancer  | Rate | 5.68538635  |
| Deaths | Mauritius                        | Age-standardized | Breast cancer   | Rate | 21.97376525 |
| Deaths | Mauritius                        | Age-standardized | Cervical cancer | Rate | 5.761302356 |
| Deaths | Mauritius                        | Age-standardized | Uterine cancer  | Rate | 3.469619319 |
| Deaths | Morocco                          | Age-standardized | Ovarian cancer  | Rate | 5.406054054 |
| Deaths | Micronesia (Federated States of) | Age-standardized | Ovarian cancer  | Rate | 5.650728629 |
| Deaths | Mauritius                        | Age-standardized | Ovarian cancer  | Rate | 5.221343963 |
| Deaths | Lesotho                          | Age-standardized | Breast cancer   | Rate | 28.36568683 |
| Deaths | Lesotho                          | Age-standardized | Cervical cancer | Rate | 35.95851941 |
| Deaths | Lesotho                          | Age-standardized | Uterine cancer  | Rate | 3.912144092 |
| Deaths | Mongolia                         | Age-standardized | Breast cancer   | Rate | 9.937911187 |
| Deaths | Mongolia                         | Age-standardized | Cervical cancer | Rate | 12.20368232 |
| Deaths | Mongolia                         | Age-standardized | Uterine cancer  | Rate | 2.199321931 |
| Deaths | Mongolia                         | Age-standardized | Ovarian cancer  | Rate | 4.365553775 |
| Deaths | Lesotho                          | Age-standardized | Ovarian cancer  | Rate | 6.282210241 |
| Deaths | Angola                           | Age-standardized | Breast cancer   | Rate | 19.96380301 |
| Deaths | Angola                           | Age-standardized | Cervical cancer | Rate | 19.84592409 |
| Deaths | Angola                           | Age-standardized | Uterine cancer  | Rate | 1.986230133 |
| Deaths | New Zealand                      | Age-standardized | Ovarian cancer  | Rate | 5.862791058 |
| Deaths | Lao People's Democratic Republic | Age-standardized | Breast cancer   | Rate | 20.78919699 |
| Deaths | Mauritania                       | Age-standardized | Ovarian cancer  | Rate | 3.853314366 |
| Deaths | South Africa                     | Age-standardized | Breast cancer   | Rate | 20.47879794 |
| Deaths | South Africa                     | Age-standardized | Cervical cancer | Rate | 16.63709854 |
| Deaths | South Africa                     | Age-standardized | Uterine cancer  | Rate | 2.300342358 |
| Deaths | South Africa                     | Age-standardized | Ovarian cancer  | Rate | 4.7314735   |
| Deaths | Lao People's Democratic Republic | Age-standardized | Cervical cancer | Rate | 8.978225275 |
| Deaths | Lao People's Democratic Republic | Age-standardized | Uterine cancer  | Rate | 3.021866834 |
| Deaths | Lao People's Democratic Republic | Age-standardized | Ovarian cancer  | Rate | 5.153013222 |
| Deaths | Zimbabwe                         | Age-standardized | Breast cancer   | Rate | 26.92724592 |
| Deaths | Zimbabwe                         | Age-standardized | Cervical cancer | Rate | 31.39109591 |
| Deaths | Zimbabwe                         | Age-standardized | Uterine cancer  | Rate | 5.491603778 |
| Deaths | South Sudan                      | Age-standardized | Breast cancer   | Rate | 13.12414004 |



|        |                          |                  |                 |      |             |
|--------|--------------------------|------------------|-----------------|------|-------------|
| Deaths | South Sudan              | Age-standardized | Cervical cancer | Rate | 18.21995085 |
| Deaths | South Sudan              | Age-standardized | Uterine cancer  | Rate | 2.46272986  |
| Deaths | Madagascar               | Age-standardized | Ovarian cancer  | Rate | 3.906240377 |
| Deaths | Suriname                 | Age-standardized | Breast cancer   | Rate | 19.02851382 |
| Deaths | Suriname                 | Age-standardized | Cervical cancer | Rate | 16.8140779  |
| Deaths | Suriname                 | Age-standardized | Uterine cancer  | Rate | 2.654563934 |
| Deaths | Namibia                  | Age-standardized | Ovarian cancer  | Rate | 3.743169716 |
| Deaths | Nepal                    | Age-standardized | Breast cancer   | Rate | 18.08324112 |
| Deaths | Nepal                    | Age-standardized | Cervical cancer | Rate | 8.146062369 |
| Deaths | Nepal                    | Age-standardized | Uterine cancer  | Rate | 1.335442159 |
| Deaths | Slovenia                 | Age-standardized | Ovarian cancer  | Rate | 6.738471548 |
| Deaths | Kiribati                 | Age-standardized | Ovarian cancer  | Rate | 2.530597805 |
| Deaths | Lithuania                | Age-standardized | Ovarian cancer  | Rate | 9.092064322 |
| Deaths | Canada                   | Age-standardized | Ovarian cancer  | Rate | 5.863127463 |
| Deaths | Greenland                | Age-standardized | Ovarian cancer  | Rate | 9.505849381 |
| Deaths | Ecuador                  | Age-standardized | Breast cancer   | Rate | 13.05967992 |
| Deaths | Ecuador                  | Age-standardized | Cervical cancer | Rate | 13.30330572 |
| Deaths | Ecuador                  | Age-standardized | Uterine cancer  | Rate | 3.967660026 |
| Deaths | Tunisia                  | Age-standardized | Breast cancer   | Rate | 15.73428823 |
| Deaths | Tunisia                  | Age-standardized | Cervical cancer | Rate | 2.568287926 |
| Deaths | Tunisia                  | Age-standardized | Uterine cancer  | Rate | 1.13325652  |
| Deaths | Kiribati                 | Age-standardized | Breast cancer   | Rate | 34.617423   |
| Deaths | Kiribati                 | Age-standardized | Cervical cancer | Rate | 69.51576467 |
| Deaths | Kiribati                 | Age-standardized | Uterine cancer  | Rate | 5.064686066 |
| Deaths | Greenland                | Age-standardized | Breast cancer   | Rate | 19.31780412 |
| Deaths | Greenland                | Age-standardized | Cervical cancer | Rate | 9.098340622 |
| Deaths | Greenland                | Age-standardized | Uterine cancer  | Rate | 1.310775091 |
| Deaths | South Sudan              | Age-standardized | Ovarian cancer  | Rate | 3.871687656 |
| Deaths | Malawi                   | Age-standardized | Ovarian cancer  | Rate | 4.042382661 |
| Deaths | Senegal                  | Age-standardized | Ovarian cancer  | Rate | 3.249021125 |
| Deaths | Tunisia                  | Age-standardized | Ovarian cancer  | Rate | 3.491840573 |
| Deaths | Brazil                   | Age-standardized | Breast cancer   | Rate | 15.12534521 |
| Deaths | Brazil                   | Age-standardized | Cervical cancer | Rate | 8.507448896 |
| Deaths | Brazil                   | Age-standardized | Uterine cancer  | Rate | 2.3788519   |
| Deaths | Pakistan                 | Age-standardized | Ovarian cancer  | Rate | 11.83819887 |
| Deaths | United States of America | Age-standardized | Breast cancer   | Rate | 18.39772832 |
| Deaths | United States of America | Age-standardized | Cervical cancer | Rate | 3.04875179  |
| Deaths | United States of America | Age-standardized | Uterine cancer  | Rate | 3.303627822 |
| Deaths | Albania                  | Age-standardized | Ovarian cancer  | Rate | 2.837905492 |
| Deaths | Malawi                   | Age-standardized | Breast cancer   | Rate | 17.24695776 |
| Deaths | Solomon Islands          | Age-standardized | Breast cancer   | Rate | 75.04148729 |
| Deaths | Solomon Islands          | Age-standardized | Cervical cancer | Rate | 29.43591455 |
| Deaths | Solomon Islands          | Age-standardized | Uterine cancer  | Rate | 7.530505134 |
| Deaths | Oman                     | Age-standardized | Breast cancer   | Rate | 15.88486043 |
| Deaths | Oman                     | Age-standardized | Cervical cancer | Rate | 3.103042868 |
| Deaths | Oman                     | Age-standardized | Uterine cancer  | Rate | 0.952841579 |
| Deaths | Slovenia                 | Age-standardized | Breast cancer   | Rate | 17.74084853 |
| Deaths | Slovenia                 | Age-standardized | Cervical cancer | Rate | 2.889720694 |
| Deaths | Slovenia                 | Age-standardized | Uterine cancer  | Rate | 3.001988575 |
| Deaths | Nigeria                  | Age-standardized | Breast cancer   | Rate | 26.98453538 |
| Deaths | Nigeria                  | Age-standardized | Cervical cancer | Rate | 12.0779963  |
| Deaths | Nigeria                  | Age-standardized | Uterine cancer  | Rate | 0.796355559 |
| Deaths | Nigeria                  | Age-standardized | Ovarian cancer  | Rate | 3.348987251 |
| Deaths | Zimbabwe                 | Age-standardized | Ovarian cancer  | Rate | 7.46585795  |
| Deaths | Republic of Moldova      | Age-standardized | Breast cancer   | Rate | 15.3102002  |
| Deaths | Samoa                    | Age-standardized | Ovarian cancer  | Rate | 8.482993507 |
| Deaths | Palestine                | Age-standardized | Breast cancer   | Rate | 25.4831903  |
| Deaths | Palestine                | Age-standardized | Cervical cancer | Rate | 2.868601238 |

|        |                                    |                  |                 |      |             |
|--------|------------------------------------|------------------|-----------------|------|-------------|
| Deaths | Palestine                          | Age-standardized | Uterine cancer  | Rate | 4.073673028 |
| Deaths | Canada                             | Age-standardized | Breast cancer   | Rate | 18.00095907 |
| Deaths | Canada                             | Age-standardized | Cervical cancer | Rate | 2.443786986 |
| Deaths | Canada                             | Age-standardized | Uterine cancer  | Rate | 2.631564256 |
| Deaths | Malawi                             | Age-standardized | Cervical cancer | Rate | 25.60994821 |
| Deaths | Malawi                             | Age-standardized | Uterine cancer  | Rate | 1.42529075  |
| Deaths | Palestine                          | Age-standardized | Ovarian cancer  | Rate | 4.574060199 |
| Deaths | Seychelles                         | Age-standardized | Ovarian cancer  | Rate | 8.866528224 |
| Deaths | Solomon Islands                    | Age-standardized | Ovarian cancer  | Rate | 3.78549695  |
| Deaths | Venezuela (Bolivarian Republic of) | Age-standardized | Breast cancer   | Rate | 17.6515814  |
| Deaths | Venezuela (Bolivarian Republic of) | Age-standardized | Cervical cancer | Rate | 15.18082507 |
| Deaths | Venezuela (Bolivarian Republic of) | Age-standardized | Uterine cancer  | Rate | 2.754128879 |
| Deaths | Venezuela (Bolivarian Republic of) | Age-standardized | Ovarian cancer  | Rate | 4.528571869 |
| Deaths | Spain                              | Age-standardized | Breast cancer   | Rate | 15.15857387 |
| Deaths | Spain                              | Age-standardized | Cervical cancer | Rate | 2.385433539 |
| Deaths | Spain                              | Age-standardized | Uterine cancer  | Rate | 2.81423705  |
| Deaths | Bosnia and Herzegovina             | Age-standardized | Breast cancer   | Rate | 20.85446376 |
| Deaths | Bosnia and Herzegovina             | Age-standardized | Cervical cancer | Rate | 5.611090305 |
| Deaths | Bosnia and Herzegovina             | Age-standardized | Uterine cancer  | Rate | 3.29984098  |
| Deaths | Luxembourg                         | Age-standardized | Breast cancer   | Rate | 19.15546662 |
| Deaths | Luxembourg                         | Age-standardized | Cervical cancer | Rate | 1.940144219 |
| Deaths | Luxembourg                         | Age-standardized | Uterine cancer  | Rate | 3.013273254 |
| Deaths | Luxembourg                         | Age-standardized | Ovarian cancer  | Rate | 7.508800715 |
| Deaths | Sao Tome and Principe              | Age-standardized | Breast cancer   | Rate | 20.81689276 |
| Deaths | Sao Tome and Principe              | Age-standardized | Cervical cancer | Rate | 26.48438896 |
| Deaths | Netherlands                        | Age-standardized | Ovarian cancer  | Rate | 7.394099752 |
| Deaths | Sao Tome and Principe              | Age-standardized | Ovarian cancer  | Rate | 6.764293758 |
| Deaths | Belgium                            | Age-standardized | Breast cancer   | Rate | 23.08806384 |
| Deaths | Belgium                            | Age-standardized | Cervical cancer | Rate | 2.693204737 |
| Deaths | Belgium                            | Age-standardized | Uterine cancer  | Rate | 2.700913921 |
| Deaths | Malta                              | Age-standardized | Breast cancer   | Rate | 20.5550238  |
| Deaths | Malta                              | Age-standardized | Cervical cancer | Rate | 1.782594208 |
| Deaths | Malta                              | Age-standardized | Uterine cancer  | Rate | 2.607193844 |
| Deaths | Malta                              | Age-standardized | Ovarian cancer  | Rate | 6.938434679 |
| Deaths | Oman                               | Age-standardized | Ovarian cancer  | Rate | 4.592674944 |
| Deaths | Uzbekistan                         | Age-standardized | Breast cancer   | Rate | 17.42638653 |
| Deaths | Uzbekistan                         | Age-standardized | Cervical cancer | Rate | 8.446072494 |
| Deaths | Uzbekistan                         | Age-standardized | Uterine cancer  | Rate | 2.622493221 |
| Deaths | Uzbekistan                         | Age-standardized | Ovarian cancer  | Rate | 3.733226795 |
| Deaths | Guam                               | Age-standardized | Breast cancer   | Rate | 17.52332956 |
| Deaths | Guam                               | Age-standardized | Cervical cancer | Rate | 5.939883228 |
| Deaths | Guam                               | Age-standardized | Uterine cancer  | Rate | 3.046774349 |
| Deaths | Andorra                            | Age-standardized | Breast cancer   | Rate | 17.25334011 |
| Deaths | Andorra                            | Age-standardized | Cervical cancer | Rate | 4.095207527 |
| Deaths | Andorra                            | Age-standardized | Uterine cancer  | Rate | 2.840643805 |
| Deaths | Guam                               | Age-standardized | Ovarian cancer  | Rate | 3.900758866 |
| Deaths | Bahamas                            | Age-standardized | Breast cancer   | Rate | 35.94417498 |
| Deaths | Bahamas                            | Age-standardized | Cervical cancer | Rate | 10.85385292 |
| Deaths | Bahamas                            | Age-standardized | Uterine cancer  | Rate | 5.242581437 |
| Deaths | Madagascar                         | Age-standardized | Breast cancer   | Rate | 16.80044283 |
| Deaths | Madagascar                         | Age-standardized | Cervical cancer | Rate | 21.86731164 |
| Deaths | Madagascar                         | Age-standardized | Uterine cancer  | Rate | 2.412470908 |
| Deaths | Bolivia (Plurinational State of)   | Age-standardized | Breast cancer   | Rate | 18.97689064 |
| Deaths | Bolivia (Plurinational State of)   | Age-standardized | Cervical cancer | Rate | 24.13785314 |
| Deaths | Bolivia (Plurinational State of)   | Age-standardized | Uterine cancer  | Rate | 5.4035324   |
| Deaths | Trinidad and Tobago                | Age-standardized | Ovarian cancer  | Rate | 6.63160277  |
| Deaths | Brazil                             | Age-standardized | Ovarian cancer  | Rate | 4.098355513 |
| Deaths | Andorra                            | Age-standardized | Ovarian cancer  | Rate | 4.501967712 |

|        |                                  |                  |                 |      |             |
|--------|----------------------------------|------------------|-----------------|------|-------------|
| Deaths | Spain                            | Age-standardized | Ovarian cancer  | Rate | 4.739023597 |
| Deaths | Bahamas                          | Age-standardized | Ovarian cancer  | Rate | 7.336618842 |
| Deaths | Democratic Republic of the Congo | Age-standardized | Breast cancer   | Rate | 22.52189669 |
| Deaths | Democratic Republic of the Congo | Age-standardized | Cervical cancer | Rate | 21.83650161 |
| Deaths | Democratic Republic of the Congo | Age-standardized | Uterine cancer  | Rate | 1.885818987 |
| Deaths | Nauru                            | Age-standardized | Ovarian cancer  | Rate | 4.802651336 |
| Deaths | Bolivia (Plurinational State of) | Age-standardized | Ovarian cancer  | Rate | 4.599008108 |
| Deaths | New Zealand                      | Age-standardized | Breast cancer   | Rate | 19.42867534 |
| Deaths | New Zealand                      | Age-standardized | Cervical cancer | Rate | 2.353144898 |
| Deaths | New Zealand                      | Age-standardized | Uterine cancer  | Rate | 3.070871865 |
| Deaths | Lithuania                        | Age-standardized | Breast cancer   | Rate | 16.6591386  |
| Deaths | Lithuania                        | Age-standardized | Cervical cancer | Rate | 5.407222266 |
| Deaths | Lithuania                        | Age-standardized | Uterine cancer  | Rate | 4.125601982 |
| Deaths | Democratic Republic of the Congo | Age-standardized | Ovarian cancer  | Rate | 2.427240804 |
| Deaths | Maldives                         | Age-standardized | Breast cancer   | Rate | 13.64860159 |
| Deaths | Maldives                         | Age-standardized | Cervical cancer | Rate | 4.139869656 |
| Deaths | Maldives                         | Age-standardized | Uterine cancer  | Rate | 1.167839963 |
| Deaths | Norway                           | Age-standardized | Breast cancer   | Rate | 15.30039648 |
| Deaths | Norway                           | Age-standardized | Cervical cancer | Rate | 2.79605655  |
| Deaths | Norway                           | Age-standardized | Uterine cancer  | Rate | 2.726699569 |
| Deaths | Eswatini                         | Age-standardized | Breast cancer   | Rate | 23.02591894 |
| Deaths | Eswatini                         | Age-standardized | Cervical cancer | Rate | 26.84881758 |
| Deaths | Eswatini                         | Age-standardized | Uterine cancer  | Rate | 3.375256133 |
| Deaths | Eswatini                         | Age-standardized | Ovarian cancer  | Rate | 6.325380547 |
| Deaths | Sao Tome and Principe            | Age-standardized | Uterine cancer  | Rate | 4.790221399 |
| Deaths | Senegal                          | Age-standardized | Breast cancer   | Rate | 21.28476578 |
| Deaths | Senegal                          | Age-standardized | Cervical cancer | Rate | 20.08928745 |
| Deaths | Senegal                          | Age-standardized | Uterine cancer  | Rate | 2.467107432 |
| Deaths | Tajikistan                       | Age-standardized | Ovarian cancer  | Rate | 4.224092711 |
| Deaths | Angola                           | Age-standardized | Ovarian cancer  | Rate | 2.618215006 |
| Deaths | Papua New Guinea                 | Age-standardized | Ovarian cancer  | Rate | 2.615075915 |
| Deaths | Central African Republic         | Age-standardized | Ovarian cancer  | Rate | 2.242134954 |
| Deaths | Latvia                           | Age-standardized | Breast cancer   | Rate | 18.51743672 |
| Deaths | Latvia                           | Age-standardized | Cervical cancer | Rate | 4.459000092 |
| Deaths | Latvia                           | Age-standardized | Uterine cancer  | Rate | 4.464307919 |
| Deaths | Monaco                           | Age-standardized | Ovarian cancer  | Rate | 13.66999442 |
| Deaths | Rwanda                           | Age-standardized | Ovarian cancer  | Rate | 6.191338347 |
| Deaths | Paraguay                         | Age-standardized | Ovarian cancer  | Rate | 3.770627323 |
| Deaths | Bahrain                          | Age-standardized | Ovarian cancer  | Rate | 7.793608229 |
| Deaths | Antigua and Barbuda              | Age-standardized | Breast cancer   | Rate | 30.15373362 |
| Deaths | Antigua and Barbuda              | Age-standardized | Cervical cancer | Rate | 10.81102085 |
| Deaths | Antigua and Barbuda              | Age-standardized | Uterine cancer  | Rate | 5.42760386  |
| Deaths | Antigua and Barbuda              | Age-standardized | Ovarian cancer  | Rate | 6.727222387 |
| Deaths | Latvia                           | Age-standardized | Ovarian cancer  | Rate | 9.222248194 |
| Deaths | Samoa                            | Age-standardized | Breast cancer   | Rate | 24.45329356 |
| Deaths | Samoa                            | Age-standardized | Cervical cancer | Rate | 12.36122638 |
| Deaths | Samoa                            | Age-standardized | Uterine cancer  | Rate | 4.585856048 |
| Deaths | Paraguay                         | Age-standardized | Breast cancer   | Rate | 18.04317749 |
| Deaths | Paraguay                         | Age-standardized | Cervical cancer | Rate | 16.69168735 |
| Deaths | Paraguay                         | Age-standardized | Uterine cancer  | Rate | 3.191816015 |
| Deaths | Monaco                           | Age-standardized | Breast cancer   | Rate | 32.09720105 |
| Deaths | Monaco                           | Age-standardized | Cervical cancer | Rate | 2.690815126 |
| Deaths | Monaco                           | Age-standardized | Uterine cancer  | Rate | 1.282089652 |
| Deaths | Bulgaria                         | Age-standardized | Breast cancer   | Rate | 23.04735431 |
| Deaths | Bulgaria                         | Age-standardized | Cervical cancer | Rate | 8.248208478 |
| Deaths | Bulgaria                         | Age-standardized | Uterine cancer  | Rate | 5.104698422 |
| Deaths | Bulgaria                         | Age-standardized | Ovarian cancer  | Rate | 7.561316299 |
| Deaths | Barbados                         | Age-standardized | Breast cancer   | Rate | 36.06441862 |

|        |                          |                  |                 |      |             |
|--------|--------------------------|------------------|-----------------|------|-------------|
| Deaths | Benin                    | Age-standardized | Breast cancer   | Rate | 15.77249971 |
| Deaths | Turkmenistan             | Age-standardized | Breast cancer   | Rate | 12.54237613 |
| Deaths | Rwanda                   | Age-standardized | Breast cancer   | Rate | 19.96484467 |
| Deaths | Rwanda                   | Age-standardized | Cervical cancer | Rate | 20.62315138 |
| Deaths | Rwanda                   | Age-standardized | Uterine cancer  | Rate | 2.532980607 |
| Deaths | Egypt                    | Age-standardized | Breast cancer   | Rate | 14.23043169 |
| Deaths | Peru                     | Age-standardized | Ovarian cancer  | Rate | 4.56450429  |
| Deaths | Central African Republic | Age-standardized | Breast cancer   | Rate | 20.22772058 |
| Deaths | Central African Republic | Age-standardized | Cervical cancer | Rate | 29.30827824 |
| Deaths | Central African Republic | Age-standardized | Uterine cancer  | Rate | 2.204367835 |
| Deaths | Belgium                  | Age-standardized | Ovarian cancer  | Rate | 6.339600118 |
| Deaths | Yemen                    | Age-standardized | Ovarian cancer  | Rate | 1.941903667 |
| Deaths | Saudi Arabia             | Age-standardized | Breast cancer   | Rate | 14.34532098 |
| Deaths | Saudi Arabia             | Age-standardized | Cervical cancer | Rate | 2.349227591 |
| Deaths | Saudi Arabia             | Age-standardized | Uterine cancer  | Rate | 1.58810505  |
| Deaths | Niue                     | Age-standardized | Breast cancer   | Rate | 30.05561442 |
| Deaths | Niue                     | Age-standardized | Cervical cancer | Rate | 10.89721653 |
| Deaths | Niue                     | Age-standardized | Uterine cancer  | Rate | 4.596768668 |
| Deaths | Niue                     | Age-standardized | Ovarian cancer  | Rate | 4.936599453 |
| Deaths | Papua New Guinea         | Age-standardized | Breast cancer   | Rate | 43.46759847 |
| Deaths | Papua New Guinea         | Age-standardized | Cervical cancer | Rate | 14.19568246 |
| Deaths | Papua New Guinea         | Age-standardized | Uterine cancer  | Rate | 3.660566249 |
| Deaths | Burkina Faso             | Age-standardized | Breast cancer   | Rate | 20.54164025 |
| Deaths | Burkina Faso             | Age-standardized | Cervical cancer | Rate | 22.75976802 |
| Deaths | Burkina Faso             | Age-standardized | Uterine cancer  | Rate | 2.381647056 |
| Deaths | Norway                   | Age-standardized | Ovarian cancer  | Rate | 7.832449347 |
| Deaths | Colombia                 | Age-standardized | Breast cancer   | Rate | 11.70700037 |
| Deaths | Colombia                 | Age-standardized | Cervical cancer | Rate | 8.411021053 |
| Deaths | Colombia                 | Age-standardized | Uterine cancer  | Rate | 1.53547556  |
| Deaths | Estonia                  | Age-standardized | Breast cancer   | Rate | 17.18947406 |
| Deaths | Togo                     | Age-standardized | Breast cancer   | Rate | 17.5897167  |
| Deaths | Togo                     | Age-standardized | Cervical cancer | Rate | 20.09666548 |
| Deaths | Togo                     | Age-standardized | Uterine cancer  | Rate | 2.259832685 |
| Deaths | Saudi Arabia             | Age-standardized | Ovarian cancer  | Rate | 3.908945111 |
| Deaths | Ecuador                  | Age-standardized | Ovarian cancer  | Rate | 4.811664876 |
| Deaths | Palau                    | Age-standardized | Ovarian cancer  | Rate | 2.865192259 |
| Deaths | Estonia                  | Age-standardized | Cervical cancer | Rate | 5.076643142 |
| Deaths | Estonia                  | Age-standardized | Uterine cancer  | Rate | 3.062132548 |
| Deaths | Estonia                  | Age-standardized | Ovarian cancer  | Rate | 7.378946814 |
| Deaths | Burkina Faso             | Age-standardized | Ovarian cancer  | Rate | 2.572406842 |
| Deaths | Togo                     | Age-standardized | Ovarian cancer  | Rate | 2.97622121  |
| Deaths | Austria                  | Age-standardized | Breast cancer   | Rate | 17.55902847 |
| Deaths | Austria                  | Age-standardized | Cervical cancer | Rate | 2.657163298 |
| Deaths | Austria                  | Age-standardized | Uterine cancer  | Rate | 2.171799025 |
| Deaths | Austria                  | Age-standardized | Ovarian cancer  | Rate | 5.953324977 |
| Deaths | Cyprus                   | Age-standardized | Ovarian cancer  | Rate | 6.394693211 |
| Deaths | Sierra Leone             | Age-standardized | Breast cancer   | Rate | 17.79633068 |
| Deaths | Sierra Leone             | Age-standardized | Cervical cancer | Rate | 22.45289554 |
| Deaths | Sierra Leone             | Age-standardized | Uterine cancer  | Rate | 2.36700265  |
| Deaths | Sierra Leone             | Age-standardized | Ovarian cancer  | Rate | 2.844058171 |
| Deaths | Algeria                  | Age-standardized | Ovarian cancer  | Rate | 2.693864218 |
| Deaths | Algeria                  | Age-standardized | Breast cancer   | Rate | 13.85902034 |
| Deaths | Algeria                  | Age-standardized | Cervical cancer | Rate | 4.522771804 |
| Deaths | Algeria                  | Age-standardized | Uterine cancer  | Rate | 0.749184803 |
| Deaths | Egypt                    | Age-standardized | Cervical cancer | Rate | 1.774393801 |
| Deaths | Egypt                    | Age-standardized | Uterine cancer  | Rate | 1.636865904 |
| Deaths | Egypt                    | Age-standardized | Ovarian cancer  | Rate | 2.17969442  |
| Deaths | Congo                    | Age-standardized | Breast cancer   | Rate | 29.87549342 |

|        |                        |                  |                 |      |             |
|--------|------------------------|------------------|-----------------|------|-------------|
| Deaths | Congo                  | Age-standardized | Cervical cancer | Rate | 23.80127029 |
| Deaths | Congo                  | Age-standardized | Uterine cancer  | Rate | 2.749123589 |
| Deaths | Congo                  | Age-standardized | Ovarian cancer  | Rate | 3.85546449  |
| Deaths | Bosnia and Herzegovina | Age-standardized | Ovarian cancer  | Rate | 7.424690182 |
| Deaths | Puerto Rico            | Age-standardized | Breast cancer   | Rate | 16.93248446 |
| Deaths | Puerto Rico            | Age-standardized | Cervical cancer | Rate | 3.768985706 |
| Deaths | Puerto Rico            | Age-standardized | Uterine cancer  | Rate | 2.670813175 |
| Deaths | Colombia               | Age-standardized | Ovarian cancer  | Rate | 4.651183673 |
| Deaths | Vanuatu                | Age-standardized | Ovarian cancer  | Rate | 2.992742041 |
| Deaths | Portugal               | Age-standardized | Breast cancer   | Rate | 16.44477857 |
| Deaths | Portugal               | Age-standardized | Cervical cancer | Rate | 3.173641699 |
| Deaths | Portugal               | Age-standardized | Uterine cancer  | Rate | 2.688229649 |
| Deaths | Mozambique             | Age-standardized | Breast cancer   | Rate | 21.47621112 |
| Deaths | Mozambique             | Age-standardized | Cervical cancer | Rate | 28.76217629 |
| Deaths | Mozambique             | Age-standardized | Uterine cancer  | Rate | 2.809657476 |
| Deaths | Mozambique             | Age-standardized | Ovarian cancer  | Rate | 4.81362076  |
| Deaths | Peru                   | Age-standardized | Breast cancer   | Rate | 10.79376699 |
| Deaths | Peru                   | Age-standardized | Cervical cancer | Rate | 12.23180312 |
| Deaths | Peru                   | Age-standardized | Uterine cancer  | Rate | 2.841644542 |
| Deaths | Syrian Arab Republic   | Age-standardized | Cervical cancer | Rate | 1.779211413 |
| Deaths | Syrian Arab Republic   | Age-standardized | Uterine cancer  | Rate | 1.108692329 |
| Deaths | Barbados               | Age-standardized | Cervical cancer | Rate | 13.10574601 |
| Deaths | Barbados               | Age-standardized | Uterine cancer  | Rate | 7.550950548 |
| Deaths | Barbados               | Age-standardized | Ovarian cancer  | Rate | 6.554300901 |
| Deaths | Tonga                  | Age-standardized | Breast cancer   | Rate | 32.34017374 |
| Deaths | Tonga                  | Age-standardized | Cervical cancer | Rate | 17.3973164  |
| Deaths | Tonga                  | Age-standardized | Uterine cancer  | Rate | 3.597039476 |
| Deaths | Portugal               | Age-standardized | Ovarian cancer  | Rate | 3.883858333 |
| Deaths | Cuba                   | Age-standardized | Breast cancer   | Rate | 17.51747879 |
| Deaths | Cuba                   | Age-standardized | Cervical cancer | Rate | 7.599480356 |
| Deaths | Cuba                   | Age-standardized | Uterine cancer  | Rate | 6.478470194 |
| Deaths | Cuba                   | Age-standardized | Ovarian cancer  | Rate | 3.710359586 |
| Deaths | Syrian Arab Republic   | Age-standardized | Breast cancer   | Rate | 11.28555475 |
| Deaths | Cyprus                 | Age-standardized | Breast cancer   | Rate | 22.13707272 |
| Deaths | Cyprus                 | Age-standardized | Cervical cancer | Rate | 2.89130336  |
| Deaths | Cyprus                 | Age-standardized | Uterine cancer  | Rate | 3.051792019 |
| Deaths | Benin                  | Age-standardized | Cervical cancer | Rate | 20.12079588 |
| Deaths | Benin                  | Age-standardized | Uterine cancer  | Rate | 2.330093079 |
| Deaths | Benin                  | Age-standardized | Ovarian cancer  | Rate | 2.631760357 |
| Deaths | Syrian Arab Republic   | Age-standardized | Ovarian cancer  | Rate | 2.290528235 |
| Deaths | Republic of Moldova    | Age-standardized | Cervical cancer | Rate | 6.364486782 |
| Deaths | Republic of Moldova    | Age-standardized | Uterine cancer  | Rate | 2.952369075 |
| Deaths | Tonga                  | Age-standardized | Ovarian cancer  | Rate | 4.154833249 |
| Deaths | Chad                   | Age-standardized | Ovarian cancer  | Rate | 1.826201229 |
| Deaths | Belize                 | Age-standardized | Breast cancer   | Rate | 11.86340593 |
| Deaths | Belize                 | Age-standardized | Cervical cancer | Rate | 17.66139873 |
| Deaths | Belize                 | Age-standardized | Uterine cancer  | Rate | 4.629438012 |
| Deaths | Belize                 | Age-standardized | Ovarian cancer  | Rate | 2.832196449 |
| Deaths | Republic of Moldova    | Age-standardized | Ovarian cancer  | Rate | 4.488792867 |
| Deaths | Seychelles             | Age-standardized | Breast cancer   | Rate | 24.99884232 |
| Deaths | Seychelles             | Age-standardized | Cervical cancer | Rate | 15.99190959 |
| Deaths | Seychelles             | Age-standardized | Uterine cancer  | Rate | 3.04512272  |
| Deaths | Turkey                 | Age-standardized | Breast cancer   | Rate | 12.64835466 |
| Deaths | Turkey                 | Age-standardized | Cervical cancer | Rate | 2.531200941 |
| Deaths | Turkey                 | Age-standardized | Uterine cancer  | Rate | 2.216754535 |
| Deaths | Turkey                 | Age-standardized | Ovarian cancer  | Rate | 4.418760621 |
| Deaths | Sweden                 | Age-standardized | Breast cancer   | Rate | 17.7663341  |
| Deaths | Sweden                 | Age-standardized | Cervical cancer | Rate | 2.715740147 |

|        |                             |                  |                 |      |             |
|--------|-----------------------------|------------------|-----------------|------|-------------|
| Deaths | Sweden                      | Age-standardized | Uterine cancer  | Rate | 2.525344638 |
| Deaths | Puerto Rico                 | Age-standardized | Ovarian cancer  | Rate | 4.234534825 |
| Deaths | Nauru                       | Age-standardized | Breast cancer   | Rate | 41.37077827 |
| Deaths | Nauru                       | Age-standardized | Cervical cancer | Rate | 19.09336254 |
| Deaths | Nauru                       | Age-standardized | Uterine cancer  | Rate | 6.883333275 |
| Deaths | Equatorial Guinea           | Age-standardized | Breast cancer   | Rate | 26.71993076 |
| Deaths | Equatorial Guinea           | Age-standardized | Cervical cancer | Rate | 17.0900016  |
| Deaths | Equatorial Guinea           | Age-standardized | Uterine cancer  | Rate | 2.342996188 |
| Deaths | Equatorial Guinea           | Age-standardized | Ovarian cancer  | Rate | 3.924297962 |
| Deaths | Russian Federation          | Age-standardized | Breast cancer   | Rate | 17.0196524  |
| Deaths | Russian Federation          | Age-standardized | Cervical cancer | Rate | 5.598447627 |
| Deaths | Russian Federation          | Age-standardized | Uterine cancer  | Rate | 4.058994146 |
| Deaths | Bahrain                     | Age-standardized | Breast cancer   | Rate | 25.16373583 |
| Deaths | Bahrain                     | Age-standardized | Cervical cancer | Rate | 2.961822298 |
| Deaths | Bahrain                     | Age-standardized | Uterine cancer  | Rate | 2.280181944 |
| Deaths | Albania                     | Age-standardized | Breast cancer   | Rate | 11.94276478 |
| Deaths | Albania                     | Age-standardized | Cervical cancer | Rate | 3.125198052 |
| Deaths | Albania                     | Age-standardized | Uterine cancer  | Rate | 2.023246674 |
| Deaths | Vanuatu                     | Age-standardized | Breast cancer   | Rate | 27.23057498 |
| Deaths | Vanuatu                     | Age-standardized | Cervical cancer | Rate | 17.07365571 |
| Deaths | Vanuatu                     | Age-standardized | Uterine cancer  | Rate | 5.069534508 |
| Deaths | Northern Mariana Islands    | Age-standardized | Breast cancer   | Rate | 27.54830448 |
| Deaths | Northern Mariana Islands    | Age-standardized | Cervical cancer | Rate | 15.63842607 |
| Deaths | Northern Mariana Islands    | Age-standardized | Uterine cancer  | Rate | 7.662736744 |
| Deaths | Northern Mariana Islands    | Age-standardized | Ovarian cancer  | Rate | 4.576378804 |
| Deaths | Cabo Verde                  | Age-standardized | Breast cancer   | Rate | 15.38260291 |
| Deaths | Cabo Verde                  | Age-standardized | Cervical cancer | Rate | 13.86366684 |
| Deaths | Cabo Verde                  | Age-standardized | Uterine cancer  | Rate | 3.385413627 |
| Deaths | United Republic of Tanzania | Age-standardized | Breast cancer   | Rate | 17.84387371 |
| Deaths | United Republic of Tanzania | Age-standardized | Cervical cancer | Rate | 22.51170914 |
| Deaths | United Republic of Tanzania | Age-standardized | Uterine cancer  | Rate | 2.828387784 |
| Deaths | Sweden                      | Age-standardized | Ovarian cancer  | Rate | 6.391611196 |
| Deaths | Somalia                     | Age-standardized | Breast cancer   | Rate | 12.90633391 |
| Deaths | Somalia                     | Age-standardized | Cervical cancer | Rate | 30.98851366 |
| Deaths | Somalia                     | Age-standardized | Uterine cancer  | Rate | 2.5394022   |
| Deaths | Somalia                     | Age-standardized | Ovarian cancer  | Rate | 3.332180566 |
| Deaths | United Republic of Tanzania | Age-standardized | Ovarian cancer  | Rate | 5.32754525  |
| Deaths | Cameroon                    | Age-standardized | Breast cancer   | Rate | 21.93212732 |
| Deaths | Cameroon                    | Age-standardized | Cervical cancer | Rate | 20.87052799 |
| Deaths | Cameroon                    | Age-standardized | Uterine cancer  | Rate | 2.762594542 |
| Deaths | Cameroon                    | Age-standardized | Ovarian cancer  | Rate | 3.969147667 |
| Deaths | United Arab Emirates        | Age-standardized | Breast cancer   | Rate | 26.19235879 |
| Deaths | United Arab Emirates        | Age-standardized | Cervical cancer | Rate | 6.801419659 |
| Deaths | United Arab Emirates        | Age-standardized | Uterine cancer  | Rate | 1.497970358 |
| Deaths | United Arab Emirates        | Age-standardized | Ovarian cancer  | Rate | 5.673701467 |
| Deaths | Gabon                       | Age-standardized | Ovarian cancer  | Rate | 4.880409405 |
| Deaths | Cabo Verde                  | Age-standardized | Ovarian cancer  | Rate | 2.52274775  |
| Deaths | Croatia                     | Age-standardized | Breast cancer   | Rate | 19.9593668  |
| Deaths | Croatia                     | Age-standardized | Cervical cancer | Rate | 3.678924472 |
| Deaths | Croatia                     | Age-standardized | Uterine cancer  | Rate | 3.356754345 |
| Deaths | Croatia                     | Age-standardized | Ovarian cancer  | Rate | 6.786532226 |
| Deaths | Yemen                       | Age-standardized | Breast cancer   | Rate | 13.43549298 |
| Deaths | Yemen                       | Age-standardized | Cervical cancer | Rate | 4.003313114 |
| Deaths | Yemen                       | Age-standardized | Uterine cancer  | Rate | 0.981247307 |
| Deaths | Palau                       | Age-standardized | Breast cancer   | Rate | 33.98387979 |
| Deaths | Palau                       | Age-standardized | Cervical cancer | Rate | 29.79107938 |
| Deaths | Palau                       | Age-standardized | Uterine cancer  | Rate | 0.516281121 |
| Deaths | Chad                        | Age-standardized | Breast cancer   | Rate | 14.04416826 |

|           |                   |                  |                 |      |             |
|-----------|-------------------|------------------|-----------------|------|-------------|
| Deaths    | Chad              | Age-standardized | Cervical cancer | Rate | 25.07840413 |
| Deaths    | Chad              | Age-standardized | Uterine cancer  | Rate | 2.375772924 |
| Deaths    | Cote d'Ivoire     | Age-standardized | Breast cancer   | Rate | 16.13247209 |
| Deaths    | Cote d'Ivoire     | Age-standardized | Cervical cancer | Rate | 18.93712677 |
| Deaths    | Cote d'Ivoire     | Age-standardized | Uterine cancer  | Rate | 2.293217598 |
| Deaths    | Cote d'Ivoire     | Age-standardized | Ovarian cancer  | Rate | 3.165899949 |
| Incidence | Tonga             | Age-standardized | Breast cancer   | Rate | 55.61488144 |
| Incidence | Tonga             | Age-standardized | Cervical cancer | Rate | 31.45144065 |
| Incidence | Tonga             | Age-standardized | Uterine cancer  | Rate | 9.253180402 |
| Incidence | Sri Lanka         | Age-standardized | Breast cancer   | Rate | 29.7848638  |
| Incidence | Sri Lanka         | Age-standardized | Cervical cancer | Rate | 7.840524133 |
| Incidence | Sri Lanka         | Age-standardized | Uterine cancer  | Rate | 6.529447211 |
| Incidence | Sri Lanka         | Age-standardized | Ovarian cancer  | Rate | 5.823242251 |
| Incidence | Brunei Darussalam | Age-standardized | Ovarian cancer  | Rate | 16.11709402 |
| Incidence | Norway            | Age-standardized | Breast cancer   | Rate | 67.71429325 |
| Incidence | Norway            | Age-standardized | Cervical cancer | Rate | 8.039199296 |
| Incidence | Norway            | Age-standardized | Ovarian cancer  | Rate | 12.33280667 |
| Incidence | Thailand          | Age-standardized | Breast cancer   | Rate | 33.3142753  |
| Incidence | Thailand          | Age-standardized | Cervical cancer | Rate | 16.27258073 |
| Incidence | Thailand          | Age-standardized | Uterine cancer  | Rate | 5.064636099 |
| Incidence | Norway            | Age-standardized | Uterine cancer  | Rate | 18.61666894 |
| Incidence | Burundi           | Age-standardized | Breast cancer   | Rate | 20.7283725  |
| Incidence | Burundi           | Age-standardized | Cervical cancer | Rate | 38.08087725 |
| Incidence | Burundi           | Age-standardized | Uterine cancer  | Rate | 3.53361959  |
| Incidence | Burundi           | Age-standardized | Ovarian cancer  | Rate | 4.585939791 |
| Incidence | Benin             | Age-standardized | Ovarian cancer  | Rate | 3.367962662 |
| Incidence | Algeria           | Age-standardized | Breast cancer   | Rate | 33.99628397 |
| Incidence | Algeria           | Age-standardized | Cervical cancer | Rate | 9.479132637 |
| Incidence | Algeria           | Age-standardized | Uterine cancer  | Rate | 2.261680473 |
| Incidence | Albania           | Age-standardized | Breast cancer   | Rate | 38.99915534 |
| Incidence | Albania           | Age-standardized | Cervical cancer | Rate | 7.983522878 |
| Incidence | Albania           | Age-standardized | Uterine cancer  | Rate | 12.15768782 |
| Incidence | Thailand          | Age-standardized | Ovarian cancer  | Rate | 7.106140876 |
| Incidence | Slovakia          | Age-standardized | Ovarian cancer  | Rate | 11.80444416 |
| Incidence | Japan             | Age-standardized | Breast cancer   | Rate | 60.4720046  |
| Incidence | Japan             | Age-standardized | Cervical cancer | Rate | 11.16926687 |
| Incidence | Japan             | Age-standardized | Uterine cancer  | Rate | 14.51221455 |
| Incidence | Japan             | Age-standardized | Ovarian cancer  | Rate | 7.443830301 |
| Incidence | France            | Age-standardized | Ovarian cancer  | Rate | 9.452907437 |
| Incidence | Albania           | Age-standardized | Ovarian cancer  | Rate | 4.957261892 |
| Incidence | Somalia           | Age-standardized | Breast cancer   | Rate | 14.94064587 |
| Incidence | Somalia           | Age-standardized | Cervical cancer | Rate | 42.17943401 |
| Incidence | Somalia           | Age-standardized | Uterine cancer  | Rate | 3.268214104 |
| Incidence | Somalia           | Age-standardized | Ovarian cancer  | Rate | 3.888511761 |
| Incidence | Timor-Leste       | Age-standardized | Uterine cancer  | Rate | 6.002989998 |
| Incidence | Timor-Leste       | Age-standardized | Ovarian cancer  | Rate | 5.572796309 |
| Incidence | Haiti             | Age-standardized | Breast cancer   | Rate | 43.44877188 |
| Incidence | Haiti             | Age-standardized | Cervical cancer | Rate | 44.11800122 |
| Incidence | Haiti             | Age-standardized | Uterine cancer  | Rate | 9.02939888  |
| Incidence | Vanuatu           | Age-standardized | Breast cancer   | Rate | 38.2418905  |
| Incidence | Vanuatu           | Age-standardized | Cervical cancer | Rate | 28.70202136 |
| Incidence | Vanuatu           | Age-standardized | Uterine cancer  | Rate | 9.555172352 |
| Incidence | Slovakia          | Age-standardized | Breast cancer   | Rate | 60.61136766 |
| Incidence | Slovakia          | Age-standardized | Cervical cancer | Rate | 16.71601109 |
| Incidence | Slovakia          | Age-standardized | Uterine cancer  | Rate | 22.00817971 |
| Incidence | Brunei Darussalam | Age-standardized | Breast cancer   | Rate | 67.73234715 |
| Incidence | Brunei Darussalam | Age-standardized | Cervical cancer | Rate | 25.03519178 |
| Incidence | Brunei Darussalam | Age-standardized | Uterine cancer  | Rate | 8.620702382 |

|           |                                       |                  |                 |      |             |
|-----------|---------------------------------------|------------------|-----------------|------|-------------|
| Incidence | Vanuatu                               | Age-standardized | Ovarian cancer  | Rate | 4.262476715 |
| Incidence | Democratic People's Republic of Korea | Age-standardized | Breast cancer   | Rate | 26.56211524 |
| Incidence | Democratic People's Republic of Korea | Age-standardized | Cervical cancer | Rate | 18.45802322 |
| Incidence | Democratic People's Republic of Korea | Age-standardized | Uterine cancer  | Rate | 7.374668244 |
| Incidence | Democratic People's Republic of Korea | Age-standardized | Ovarian cancer  | Rate | 4.732536349 |
| Incidence | Bosnia and Herzegovina                | Age-standardized | Breast cancer   | Rate | 55.46891091 |
| Incidence | Bosnia and Herzegovina                | Age-standardized | Cervical cancer | Rate | 13.47016296 |
| Incidence | Bosnia and Herzegovina                | Age-standardized | Uterine cancer  | Rate | 15.71216454 |
| Incidence | Slovenia                              | Age-standardized | Breast cancer   | Rate | 64.72796221 |
| Incidence | Slovenia                              | Age-standardized | Cervical cancer | Rate | 10.03285342 |
| Incidence | Slovenia                              | Age-standardized | Uterine cancer  | Rate | 18.28510963 |
| Incidence | Algeria                               | Age-standardized | Ovarian cancer  | Rate | 4.098526767 |
| Incidence | Puerto Rico                           | Age-standardized | Ovarian cancer  | Rate | 6.861839587 |
| Incidence | Timor-Leste                           | Age-standardized | Breast cancer   | Rate | 24.92715757 |
| Incidence | Timor-Leste                           | Age-standardized | Cervical cancer | Rate | 15.52179518 |
| Incidence | Burkina Faso                          | Age-standardized | Breast cancer   | Rate | 27.07225535 |
| Incidence | Burkina Faso                          | Age-standardized | Cervical cancer | Rate | 34.4587648  |
| Incidence | Burkina Faso                          | Age-standardized | Uterine cancer  | Rate | 3.586853223 |
| Incidence | China                                 | Age-standardized | Ovarian cancer  | Rate | 4.535544033 |
| Incidence | Qatar                                 | Age-standardized | Breast cancer   | Rate | 103.7201007 |
| Incidence | Qatar                                 | Age-standardized | Cervical cancer | Rate | 8.342181668 |
| Incidence | Qatar                                 | Age-standardized | Uterine cancer  | Rate | 9.493107479 |
| Incidence | Qatar                                 | Age-standardized | Ovarian cancer  | Rate | 11.42065857 |
| Incidence | China                                 | Age-standardized | Breast cancer   | Rate | 35.61250147 |
| Incidence | China                                 | Age-standardized | Cervical cancer | Rate | 11.00952938 |
| Incidence | Slovenia                              | Age-standardized | Ovarian cancer  | Rate | 9.57188422  |
| Incidence | Czechia                               | Age-standardized | Ovarian cancer  | Rate | 12.35004479 |
| Incidence | Nepal                                 | Age-standardized | Breast cancer   | Rate | 28.81489064 |
| Incidence | Nepal                                 | Age-standardized | Cervical cancer | Rate | 13.91421344 |
| Incidence | Nepal                                 | Age-standardized | Uterine cancer  | Rate | 2.457838574 |
| Incidence | Bosnia and Herzegovina                | Age-standardized | Ovarian cancer  | Rate | 11.44612227 |
| Incidence | Haiti                                 | Age-standardized | Ovarian cancer  | Rate | 4.430600996 |
| Incidence | Denmark                               | Age-standardized | Ovarian cancer  | Rate | 11.78923517 |
| Incidence | Portugal                              | Age-standardized | Breast cancer   | Rate | 73.33374547 |
| Incidence | Portugal                              | Age-standardized | Cervical cancer | Rate | 10.37456101 |
| Incidence | Portugal                              | Age-standardized | Uterine cancer  | Rate | 19.47874026 |
| Incidence | Saint Kitts and Nevis                 | Age-standardized | Breast cancer   | Rate | 84.08069578 |
| Incidence | Saint Kitts and Nevis                 | Age-standardized | Cervical cancer | Rate | 29.0742878  |
| Incidence | Saint Kitts and Nevis                 | Age-standardized | Uterine cancer  | Rate | 20.83228349 |
| Incidence | El Salvador                           | Age-standardized | Breast cancer   | Rate | 30.08126063 |
| Incidence | El Salvador                           | Age-standardized | Cervical cancer | Rate | 29.33148927 |
| Incidence | El Salvador                           | Age-standardized | Uterine cancer  | Rate | 7.127874112 |
| Incidence | Bahrain                               | Age-standardized | Cervical cancer | Rate | 5.645015124 |
| Incidence | Bahrain                               | Age-standardized | Uterine cancer  | Rate | 9.133317601 |
| Incidence | Bahrain                               | Age-standardized | Ovarian cancer  | Rate | 10.86647282 |
| Incidence | Greece                                | Age-standardized | Breast cancer   | Rate | 85.48997574 |
| Incidence | Greece                                | Age-standardized | Cervical cancer | Rate | 8.279004331 |
| Incidence | Greece                                | Age-standardized | Uterine cancer  | Rate | 20.59689441 |
| Incidence | Republic of Korea                     | Age-standardized | Breast cancer   | Rate | 46.39715237 |
| Incidence | Republic of Korea                     | Age-standardized | Cervical cancer | Rate | 9.08020599  |
| Incidence | Republic of Korea                     | Age-standardized | Uterine cancer  | Rate | 4.637250162 |
| Incidence | Hungary                               | Age-standardized | Ovarian cancer  | Rate | 11.42951545 |
| Incidence | Taiwan (Province of China)            | Age-standardized | Breast cancer   | Rate | 49.41875887 |
| Incidence | Taiwan (Province of China)            | Age-standardized | Cervical cancer | Rate | 13.09212465 |
| Incidence | Taiwan (Province of China)            | Age-standardized | Uterine cancer  | Rate | 14.49240746 |
| Incidence | Germany                               | Age-standardized | Breast cancer   | Rate | 84.69533562 |
| Incidence | Germany                               | Age-standardized | Cervical cancer | Rate | 9.329778067 |
| Incidence | Germany                               | Age-standardized | Uterine cancer  | Rate | 15.51765993 |



|           |                                  |                  |                 |      |             |
|-----------|----------------------------------|------------------|-----------------|------|-------------|
| Incidence | Germany                          | Age-standardized | Ovarian cancer  | Rate | 10.67665614 |
| Incidence | Belarus                          | Age-standardized | Breast cancer   | Rate | 48.8760489  |
| Incidence | Belarus                          | Age-standardized | Cervical cancer | Rate | 15.40968757 |
| Incidence | Belarus                          | Age-standardized | Uterine cancer  | Rate | 14.37383493 |
| Incidence | Jamaica                          | Age-standardized | Ovarian cancer  | Rate | 8.250647201 |
| Incidence | Azerbaijan                       | Age-standardized | Ovarian cancer  | Rate | 5.60701042  |
| Incidence | Saudi Arabia                     | Age-standardized | Ovarian cancer  | Rate | 6.273018336 |
| Incidence | India                            | Age-standardized | Breast cancer   | Rate | 23.03544651 |
| Incidence | India                            | Age-standardized | Cervical cancer | Rate | 13.10363217 |
| Incidence | India                            | Age-standardized | Uterine cancer  | Rate | 2.530198428 |
| Incidence | Croatia                          | Age-standardized | Breast cancer   | Rate | 68.33758223 |
| Incidence | Croatia                          | Age-standardized | Cervical cancer | Rate | 12.24560845 |
| Incidence | Croatia                          | Age-standardized | Uterine cancer  | Rate | 27.84745623 |
| Incidence | Armenia                          | Age-standardized | Ovarian cancer  | Rate | 7.728284785 |
| Incidence | Guatemala                        | Age-standardized | Breast cancer   | Rate | 22.06733928 |
| Incidence | Guatemala                        | Age-standardized | Cervical cancer | Rate | 31.18012116 |
| Incidence | Guatemala                        | Age-standardized | Uterine cancer  | Rate | 6.532228448 |
| Incidence | Armenia                          | Age-standardized | Breast cancer   | Rate | 61.17275735 |
| Incidence | Armenia                          | Age-standardized | Cervical cancer | Rate | 15.61159906 |
| Incidence | Armenia                          | Age-standardized | Uterine cancer  | Rate | 15.81064215 |
| Incidence | Saint Vincent and the Grenadines | Age-standardized | Cervical cancer | Rate | 41.01000695 |
| Incidence | Saint Vincent and the Grenadines | Age-standardized | Uterine cancer  | Rate | 19.66903637 |
| Incidence | Saint Vincent and the Grenadines | Age-standardized | Ovarian cancer  | Rate | 9.084988059 |
| Incidence | Guatemala                        | Age-standardized | Ovarian cancer  | Rate | 4.733872424 |
| Incidence | Syrian Arab Republic             | Age-standardized | Ovarian cancer  | Rate | 3.550516338 |
| Incidence | Pakistan                         | Age-standardized | Ovarian cancer  | Rate | 15.84853905 |
| Incidence | United Republic of Tanzania      | Age-standardized | Ovarian cancer  | Rate | 6.800831655 |
| Incidence | Taiwan (Province of China)       | Age-standardized | Ovarian cancer  | Rate | 8.683028997 |
| Incidence | North Macedonia                  | Age-standardized | Breast cancer   | Rate | 72.94421465 |
| Incidence | North Macedonia                  | Age-standardized | Cervical cancer | Rate | 14.50950995 |
| Incidence | North Macedonia                  | Age-standardized | Uterine cancer  | Rate | 25.11890491 |
| Incidence | Greenland                        | Age-standardized | Breast cancer   | Rate | 45.17306212 |
| Incidence | Greenland                        | Age-standardized | Cervical cancer | Rate | 24.61878821 |
| Incidence | Greenland                        | Age-standardized | Uterine cancer  | Rate | 3.862846421 |
| Incidence | United States of America         | Age-standardized | Breast cancer   | Rate | 94.20601707 |
| Incidence | United States of America         | Age-standardized | Cervical cancer | Rate | 8.669382737 |
| Incidence | United States of America         | Age-standardized | Uterine cancer  | Rate | 28.80376548 |
| Incidence | United States of America         | Age-standardized | Ovarian cancer  | Rate | 9.908228979 |
| Incidence | Viet Nam                         | Age-standardized | Breast cancer   | Rate | 48.64747007 |
| Incidence | Viet Nam                         | Age-standardized | Cervical cancer | Rate | 17.76852587 |
| Incidence | Viet Nam                         | Age-standardized | Uterine cancer  | Rate | 4.309424777 |
| Incidence | Singapore                        | Age-standardized | Ovarian cancer  | Rate | 7.422203871 |
| Incidence | Iran (Islamic Republic of)       | Age-standardized | Breast cancer   | Rate | 34.04920395 |
| Incidence | Iran (Islamic Republic of)       | Age-standardized | Cervical cancer | Rate | 3.986777205 |
| Incidence | Iran (Islamic Republic of)       | Age-standardized | Uterine cancer  | Rate | 4.021489989 |
| Incidence | China                            | Age-standardized | Uterine cancer  | Rate | 6.387985279 |
| Incidence | Uganda                           | Age-standardized | Uterine cancer  | Rate | 6.420798355 |
| Incidence | Uganda                           | Age-standardized | Ovarian cancer  | Rate | 8.802569402 |
| Incidence | Djibouti                         | Age-standardized | Breast cancer   | Rate | 27.61746401 |
| Incidence | Nepal                            | Age-standardized | Ovarian cancer  | Rate | 5.964884179 |
| Incidence | Burkina Faso                     | Age-standardized | Ovarian cancer  | Rate | 3.303375488 |
| Incidence | Croatia                          | Age-standardized | Ovarian cancer  | Rate | 12.79548113 |
| Incidence | Costa Rica                       | Age-standardized | Ovarian cancer  | Rate | 6.20735022  |
| Incidence | Comoros                          | Age-standardized | Ovarian cancer  | Rate | 8.22236458  |
| Incidence | Kiribati                         | Age-standardized | Ovarian cancer  | Rate | 3.662555342 |
| Incidence | Djibouti                         | Age-standardized | Ovarian cancer  | Rate | 7.407847867 |
| Incidence | Uganda                           | Age-standardized | Breast cancer   | Rate | 31.44022512 |
| Incidence | Bermuda                          | Age-standardized | Breast cancer   | Rate | 80.23393332 |

|           |                                  |                  |                 |      |             |
|-----------|----------------------------------|------------------|-----------------|------|-------------|
| Incidence | Bermuda                          | Age-standardized | Cervical cancer | Rate | 8.337051118 |
| Incidence | Bermuda                          | Age-standardized | Uterine cancer  | Rate | 15.50901259 |
| Incidence | Sudan                            | Age-standardized | Breast cancer   | Rate | 24.04411728 |
| Incidence | Sudan                            | Age-standardized | Cervical cancer | Rate | 5.493179124 |
| Incidence | Sudan                            | Age-standardized | Uterine cancer  | Rate | 2.250024124 |
| Incidence | Bulgaria                         | Age-standardized | Breast cancer   | Rate | 78.17598562 |
| Incidence | Bulgaria                         | Age-standardized | Cervical cancer | Rate | 22.94339486 |
| Incidence | Bulgaria                         | Age-standardized | Uterine cancer  | Rate | 30.65761892 |
| Incidence | Suriname                         | Age-standardized | Breast cancer   | Rate | 39.46140536 |
| Incidence | Suriname                         | Age-standardized | Cervical cancer | Rate | 32.61069356 |
| Incidence | Suriname                         | Age-standardized | Uterine cancer  | Rate | 6.067886686 |
| Incidence | Saint Lucia                      | Age-standardized | Ovarian cancer  | Rate | 9.329211083 |
| Incidence | India                            | Age-standardized | Ovarian cancer  | Rate | 5.011083236 |
| Incidence | San Marino                       | Age-standardized | Ovarian cancer  | Rate | 7.186553859 |
| Incidence | Cameroon                         | Age-standardized | Breast cancer   | Rate | 30.8398372  |
| Incidence | Cameroon                         | Age-standardized | Cervical cancer | Rate | 32.57411071 |
| Incidence | Cameroon                         | Age-standardized | Uterine cancer  | Rate | 4.471207054 |
| Incidence | Kiribati                         | Age-standardized | Breast cancer   | Rate | 46.02280515 |
| Incidence | Kiribati                         | Age-standardized | Cervical cancer | Rate | 108.800995  |
| Incidence | Kiribati                         | Age-standardized | Uterine cancer  | Rate | 8.521302322 |
| Incidence | Azerbaijan                       | Age-standardized | Breast cancer   | Rate | 38.50841279 |
| Incidence | Azerbaijan                       | Age-standardized | Cervical cancer | Rate | 11.88056684 |
| Incidence | Azerbaijan                       | Age-standardized | Uterine cancer  | Rate | 9.72152853  |
| Incidence | Nigeria                          | Age-standardized | Breast cancer   | Rate | 38.82474452 |
| Incidence | Nigeria                          | Age-standardized | Cervical cancer | Rate | 18.23118372 |
| Incidence | Nigeria                          | Age-standardized | Uterine cancer  | Rate | 1.311653697 |
| Incidence | Georgia                          | Age-standardized | Breast cancer   | Rate | 65.83491142 |
| Incidence | Georgia                          | Age-standardized | Cervical cancer | Rate | 17.17823136 |
| Incidence | Georgia                          | Age-standardized | Uterine cancer  | Rate | 23.68419254 |
| Incidence | Georgia                          | Age-standardized | Ovarian cancer  | Rate | 9.678311833 |
| Incidence | Republic of Korea                | Age-standardized | Ovarian cancer  | Rate | 5.512807776 |
| Incidence | Honduras                         | Age-standardized | Breast cancer   | Rate | 27.29940127 |
| Incidence | Honduras                         | Age-standardized | Cervical cancer | Rate | 18.98688181 |
| Incidence | Honduras                         | Age-standardized | Uterine cancer  | Rate | 10.23211824 |
| Incidence | Honduras                         | Age-standardized | Ovarian cancer  | Rate | 5.640725465 |
| Incidence | Saint Lucia                      | Age-standardized | Breast cancer   | Rate | 55.29465625 |
| Incidence | Saint Lucia                      | Age-standardized | Cervical cancer | Rate | 28.52222226 |
| Incidence | Saint Lucia                      | Age-standardized | Uterine cancer  | Rate | 13.06627348 |
| Incidence | Saint Vincent and the Grenadines | Age-standardized | Breast cancer   | Rate | 68.05169577 |
| Incidence | Montenegro                       | Age-standardized | Breast cancer   | Rate | 86.13694614 |
| Incidence | Montenegro                       | Age-standardized | Cervical cancer | Rate | 13.57934757 |
| Incidence | Montenegro                       | Age-standardized | Uterine cancer  | Rate | 17.23735739 |
| Incidence | Jamaica                          | Age-standardized | Breast cancer   | Rate | 79.28247575 |
| Incidence | Jamaica                          | Age-standardized | Cervical cancer | Rate | 34.14334502 |
| Incidence | Jamaica                          | Age-standardized | Uterine cancer  | Rate | 18.50409239 |
| Incidence | Fiji                             | Age-standardized | Ovarian cancer  | Rate | 2.950231686 |
| Incidence | Suriname                         | Age-standardized | Ovarian cancer  | Rate | 8.867327616 |
| Incidence | Marshall Islands                 | Age-standardized | Ovarian cancer  | Rate | 7.245085544 |
| Incidence | American Samoa                   | Age-standardized | Breast cancer   | Rate | 55.95435982 |
| Incidence | American Samoa                   | Age-standardized | Cervical cancer | Rate | 18.64709287 |
| Incidence | Puerto Rico                      | Age-standardized | Breast cancer   | Rate | 70.80964134 |
| Incidence | Puerto Rico                      | Age-standardized | Cervical cancer | Rate | 10.85506455 |
| Incidence | Puerto Rico                      | Age-standardized | Uterine cancer  | Rate | 13.38225898 |
| Incidence | Uganda                           | Age-standardized | Cervical cancer | Rate | 37.91767149 |
| Incidence | Latvia                           | Age-standardized | Ovarian cancer  | Rate | 12.0247886  |
| Incidence | Comoros                          | Age-standardized | Breast cancer   | Rate | 26.51928147 |
| Incidence | Comoros                          | Age-standardized | Cervical cancer | Rate | 34.70704114 |
| Incidence | Comoros                          | Age-standardized | Uterine cancer  | Rate | 4.511337244 |

|           |                       |                  |                 |      |             |
|-----------|-----------------------|------------------|-----------------|------|-------------|
| Incidence | Czechia               | Age-standardized | Breast cancer   | Rate | 58.33021787 |
| Incidence | Czechia               | Age-standardized | Cervical cancer | Rate | 11.20451224 |
| Incidence | Czechia               | Age-standardized | Uterine cancer  | Rate | 21.21320341 |
| Incidence | Syrian Arab Republic  | Age-standardized | Breast cancer   | Rate | 26.87998064 |
| Incidence | Syrian Arab Republic  | Age-standardized | Cervical cancer | Rate | 3.249687339 |
| Incidence | Syrian Arab Republic  | Age-standardized | Uterine cancer  | Rate | 3.808414633 |
| Incidence | Pakistan              | Age-standardized | Breast cancer   | Rate | 76.49448443 |
| Incidence | Pakistan              | Age-standardized | Cervical cancer | Rate | 7.703104587 |
| Incidence | Cook Islands          | Age-standardized | Ovarian cancer  | Rate | 4.967222482 |
| Incidence | Pakistan              | Age-standardized | Uterine cancer  | Rate | 8.602807608 |
| Incidence | Denmark               | Age-standardized | Breast cancer   | Rate | 84.4800065  |
| Incidence | Denmark               | Age-standardized | Cervical cancer | Rate | 8.979370096 |
| Incidence | Portugal              | Age-standardized | Ovarian cancer  | Rate | 5.819249722 |
| Incidence | Estonia               | Age-standardized | Breast cancer   | Rate | 65.58530898 |
| Incidence | Estonia               | Age-standardized | Cervical cancer | Rate | 16.60615043 |
| Incidence | Estonia               | Age-standardized | Uterine cancer  | Rate | 25.08040176 |
| Incidence | Singapore             | Age-standardized | Breast cancer   | Rate | 62.72190381 |
| Incidence | Singapore             | Age-standardized | Cervical cancer | Rate | 7.699611049 |
| Incidence | Singapore             | Age-standardized | Uterine cancer  | Rate | 9.932645022 |
| Incidence | Egypt                 | Age-standardized | Ovarian cancer  | Rate | 3.265215376 |
| Incidence | Belarus               | Age-standardized | Ovarian cancer  | Rate | 8.590428202 |
| Incidence | Cameroon              | Age-standardized | Ovarian cancer  | Rate | 5.174130739 |
| Incidence | Djibouti              | Age-standardized | Cervical cancer | Rate | 33.90299232 |
| Incidence | Djibouti              | Age-standardized | Uterine cancer  | Rate | 4.914483996 |
| Incidence | Saudi Arabia          | Age-standardized | Breast cancer   | Rate | 43.06609521 |
| Incidence | Saudi Arabia          | Age-standardized | Cervical cancer | Rate | 4.952895915 |
| Incidence | Saudi Arabia          | Age-standardized | Uterine cancer  | Rate | 6.731588059 |
| Incidence | Bermuda               | Age-standardized | Ovarian cancer  | Rate | 10.29626195 |
| Incidence | Tunisia               | Age-standardized | Breast cancer   | Rate | 46.02166343 |
| Incidence | Tunisia               | Age-standardized | Cervical cancer | Rate | 5.719067968 |
| Incidence | Tunisia               | Age-standardized | Uterine cancer  | Rate | 4.428402119 |
| Incidence | Hungary               | Age-standardized | Breast cancer   | Rate | 63.99975243 |
| Incidence | Hungary               | Age-standardized | Cervical cancer | Rate | 14.26792617 |
| Incidence | Hungary               | Age-standardized | Uterine cancer  | Rate | 17.55626452 |
| Incidence | Antigua and Barbuda   | Age-standardized | Breast cancer   | Rate | 80.44348167 |
| Incidence | Antigua and Barbuda   | Age-standardized | Cervical cancer | Rate | 21.43654193 |
| Incidence | Antigua and Barbuda   | Age-standardized | Uterine cancer  | Rate | 16.23339631 |
| Incidence | Antigua and Barbuda   | Age-standardized | Ovarian cancer  | Rate | 9.502405522 |
| Incidence | Bahamas               | Age-standardized | Breast cancer   | Rate | 92.11532966 |
| Incidence | Bahamas               | Age-standardized | Cervical cancer | Rate | 23.8157276  |
| Incidence | Bahamas               | Age-standardized | Uterine cancer  | Rate | 15.20237935 |
| Incidence | Kazakhstan            | Age-standardized | Breast cancer   | Rate | 40.06503607 |
| Incidence | Kazakhstan            | Age-standardized | Cervical cancer | Rate | 18.48093345 |
| Incidence | Kazakhstan            | Age-standardized | Uterine cancer  | Rate | 13.41144374 |
| Incidence | Cabo Verde            | Age-standardized | Breast cancer   | Rate | 27.74730553 |
| Incidence | Finland               | Age-standardized | Breast cancer   | Rate | 84.60799597 |
| Incidence | Finland               | Age-standardized | Cervical cancer | Rate | 5.178167674 |
| Incidence | Finland               | Age-standardized | Uterine cancer  | Rate | 18.46787955 |
| Incidence | Finland               | Age-standardized | Ovarian cancer  | Rate | 11.53392961 |
| Incidence | Mexico                | Age-standardized | Breast cancer   | Rate | 36.80727773 |
| Incidence | Mexico                | Age-standardized | Cervical cancer | Rate | 18.34353605 |
| Incidence | Mexico                | Age-standardized | Uterine cancer  | Rate | 5.398918696 |
| Incidence | Spain                 | Age-standardized | Breast cancer   | Rate | 69.89736029 |
| Incidence | Spain                 | Age-standardized | Cervical cancer | Rate | 8.699812722 |
| Incidence | Greenland             | Age-standardized | Ovarian cancer  | Rate | 13.57139714 |
| Incidence | Nigeria               | Age-standardized | Ovarian cancer  | Rate | 4.186003043 |
| Incidence | Sao Tome and Principe | Age-standardized | Ovarian cancer  | Rate | 9.288226001 |
| Incidence | American Samoa        | Age-standardized | Uterine cancer  | Rate | 29.8246173  |

|           |                             |                  |                 |      |             |
|-----------|-----------------------------|------------------|-----------------|------|-------------|
| Incidence | American Samoa              | Age-standardized | Ovarian cancer  | Rate | 15.59884767 |
| Incidence | Niger                       | Age-standardized | Ovarian cancer  | Rate | 2.145844718 |
| Incidence | El Salvador                 | Age-standardized | Ovarian cancer  | Rate | 6.191043751 |
| Incidence | Bahamas                     | Age-standardized | Ovarian cancer  | Rate | 11.52848998 |
| Incidence | Niger                       | Age-standardized | Breast cancer   | Rate | 14.36745595 |
| Incidence | Niger                       | Age-standardized | Cervical cancer | Rate | 33.97807453 |
| Incidence | Niger                       | Age-standardized | Uterine cancer  | Rate | 3.016077782 |
| Incidence | Tunisia                     | Age-standardized | Ovarian cancer  | Rate | 5.394591883 |
| Incidence | Benin                       | Age-standardized | Breast cancer   | Rate | 21.18364747 |
| Incidence | Benin                       | Age-standardized | Cervical cancer | Rate | 30.14661742 |
| Incidence | Benin                       | Age-standardized | Uterine cancer  | Rate | 3.532170863 |
| Incidence | San Marino                  | Age-standardized | Breast cancer   | Rate | 84.15957321 |
| Incidence | San Marino                  | Age-standardized | Cervical cancer | Rate | 6.751616629 |
| Incidence | San Marino                  | Age-standardized | Uterine cancer  | Rate | 5.833528686 |
| Incidence | Indonesia                   | Age-standardized | Breast cancer   | Rate | 37.42214156 |
| Incidence | Spain                       | Age-standardized | Uterine cancer  | Rate | 22.00698458 |
| Incidence | Viet Nam                    | Age-standardized | Ovarian cancer  | Rate | 7.010819134 |
| Incidence | Saint Kitts and Nevis       | Age-standardized | Ovarian cancer  | Rate | 10.116687   |
| Incidence | Indonesia                   | Age-standardized | Ovarian cancer  | Rate | 8.159578155 |
| Incidence | Indonesia                   | Age-standardized | Cervical cancer | Rate | 12.80533329 |
| Incidence | Indonesia                   | Age-standardized | Uterine cancer  | Rate | 6.852260821 |
| Incidence | Republic of Moldova         | Age-standardized | Ovarian cancer  | Rate | 6.562709049 |
| Incidence | New Zealand                 | Age-standardized | Ovarian cancer  | Rate | 9.153063707 |
| Incidence | Trinidad and Tobago         | Age-standardized | Ovarian cancer  | Rate | 9.963184693 |
| Incidence | Egypt                       | Age-standardized | Breast cancer   | Rate | 29.31176473 |
| Incidence | Egypt                       | Age-standardized | Cervical cancer | Rate | 2.838374816 |
| Incidence | Egypt                       | Age-standardized | Uterine cancer  | Rate | 4.45118497  |
| Incidence | Sudan                       | Age-standardized | Ovarian cancer  | Rate | 3.070370148 |
| Incidence | United Republic of Tanzania | Age-standardized | Breast cancer   | Rate | 23.85641693 |
| Incidence | United Republic of Tanzania | Age-standardized | Cervical cancer | Rate | 35.16911284 |
| Incidence | United Republic of Tanzania | Age-standardized | Uterine cancer  | Rate | 4.555112826 |
| Incidence | Sweden                      | Age-standardized | Breast cancer   | Rate | 82.51096398 |
| Incidence | Sweden                      | Age-standardized | Cervical cancer | Rate | 6.928689576 |
| Incidence | Sweden                      | Age-standardized | Uterine cancer  | Rate | 17.85108184 |
| Incidence | Lithuania                   | Age-standardized | Breast cancer   | Rate | 50.50752951 |
| Incidence | Lithuania                   | Age-standardized | Cervical cancer | Rate | 12.43334266 |
| Incidence | Lithuania                   | Age-standardized | Uterine cancer  | Rate | 15.12626414 |
| Incidence | Lithuania                   | Age-standardized | Ovarian cancer  | Rate | 12.51356211 |
| Incidence | Guam                        | Age-standardized | Breast cancer   | Rate | 38.02461649 |
| Incidence | Guam                        | Age-standardized | Cervical cancer | Rate | 13.64711819 |
| Incidence | Guam                        | Age-standardized | Uterine cancer  | Rate | 11.5286606  |
| Incidence | United Arab Emirates        | Age-standardized | Ovarian cancer  | Rate | 8.461333492 |
| Incidence | Mexico                      | Age-standardized | Ovarian cancer  | Rate | 8.121211449 |
| Incidence | Bulgaria                    | Age-standardized | Ovarian cancer  | Rate | 12.28942254 |
| Incidence | Denmark                     | Age-standardized | Uterine cancer  | Rate | 17.70253486 |
| Incidence | Bahrain                     | Age-standardized | Breast cancer   | Rate | 67.49501356 |
| Incidence | Spain                       | Age-standardized | Ovarian cancer  | Rate | 9.304524823 |
| Incidence | Sweden                      | Age-standardized | Ovarian cancer  | Rate | 9.52659722  |
| Incidence | United Kingdom              | Age-standardized | Breast cancer   | Rate | 94.28797237 |
| Incidence | United Kingdom              | Age-standardized | Cervical cancer | Rate | 8.186649638 |
| Incidence | United Kingdom              | Age-standardized | Uterine cancer  | Rate | 18.40511572 |
| Incidence | Estonia                     | Age-standardized | Ovarian cancer  | Rate | 10.90976917 |
| Incidence | France                      | Age-standardized | Breast cancer   | Rate | 86.90309754 |
| Incidence | France                      | Age-standardized | Cervical cancer | Rate | 8.095957318 |
| Incidence | France                      | Age-standardized | Uterine cancer  | Rate | 18.6745986  |
| Incidence | Iran (Islamic Republic of)  | Age-standardized | Ovarian cancer  | Rate | 4.753055907 |
| Incidence | Cambodia                    | Age-standardized | Breast cancer   | Rate | 23.52036151 |
| Incidence | Cambodia                    | Age-standardized | Cervical cancer | Rate | 17.82061227 |

|           |                                  |                  |                 |      |             |
|-----------|----------------------------------|------------------|-----------------|------|-------------|
| Incidence | Cambodia                         | Age-standardized | Uterine cancer  | Rate | 7.198383152 |
| Incidence | Australia                        | Age-standardized | Cervical cancer | Rate | 8.54913056  |
| Incidence | Australia                        | Age-standardized | Uterine cancer  | Rate | 10.35445249 |
| Incidence | Fiji                             | Age-standardized | Breast cancer   | Rate | 59.21876124 |
| Incidence | Fiji                             | Age-standardized | Cervical cancer | Rate | 40.43653901 |
| Incidence | Kazakhstan                       | Age-standardized | Ovarian cancer  | Rate | 10.02043385 |
| Incidence | Cook Islands                     | Age-standardized | Breast cancer   | Rate | 90.88826736 |
| Incidence | Cook Islands                     | Age-standardized | Cervical cancer | Rate | 8.863583135 |
| Incidence | Cook Islands                     | Age-standardized | Uterine cancer  | Rate | 8.076049759 |
| Incidence | Marshall Islands                 | Age-standardized | Breast cancer   | Rate | 58.34284526 |
| Incidence | Marshall Islands                 | Age-standardized | Cervical cancer | Rate | 37.89618179 |
| Incidence | Marshall Islands                 | Age-standardized | Uterine cancer  | Rate | 13.59503635 |
| Incidence | Trinidad and Tobago              | Age-standardized | Breast cancer   | Rate | 57.69025943 |
| Incidence | Trinidad and Tobago              | Age-standardized | Cervical cancer | Rate | 22.28112365 |
| Incidence | Trinidad and Tobago              | Age-standardized | Uterine cancer  | Rate | 16.01993754 |
| Incidence | Kyrgyzstan                       | Age-standardized | Breast cancer   | Rate | 22.43058248 |
| Incidence | Micronesia (Federated States of) | Age-standardized | Cervical cancer | Rate | 36.20545046 |
| Incidence | Micronesia (Federated States of) | Age-standardized | Uterine cancer  | Rate | 16.20485682 |
| Incidence | Eritrea                          | Age-standardized | Breast cancer   | Rate | 28.73213898 |
| Incidence | Cabo Verde                       | Age-standardized | Cervical cancer | Rate | 23.01529896 |
| Incidence | Cabo Verde                       | Age-standardized | Uterine cancer  | Rate | 7.16098204  |
| Incidence | Cabo Verde                       | Age-standardized | Ovarian cancer  | Rate | 3.840997902 |
| Incidence | Cambodia                         | Age-standardized | Ovarian cancer  | Rate | 8.393171073 |
| Incidence | Micronesia (Federated States of) | Age-standardized | Ovarian cancer  | Rate | 8.497325337 |
| Incidence | New Zealand                      | Age-standardized | Breast cancer   | Rate | 101.2075181 |
| Incidence | New Zealand                      | Age-standardized | Cervical cancer | Rate | 6.362957723 |
| Incidence | New Zealand                      | Age-standardized | Uterine cancer  | Rate | 15.92663202 |
| Incidence | Fiji                             | Age-standardized | Uterine cancer  | Rate | 10.96495035 |
| Incidence | Panama                           | Age-standardized | Ovarian cancer  | Rate | 6.155359083 |
| Incidence | Sao Tome and Principe            | Age-standardized | Breast cancer   | Rate | 32.13239163 |
| Incidence | Sao Tome and Principe            | Age-standardized | Cervical cancer | Rate | 44.0073991  |
| Incidence | Sao Tome and Principe            | Age-standardized | Uterine cancer  | Rate | 8.357249643 |
| Incidence | Yemen                            | Age-standardized | Ovarian cancer  | Rate | 2.593206241 |
| Incidence | Turkey                           | Age-standardized | Breast cancer   | Rate | 36.08433474 |
| Incidence | Tokelau                          | Age-standardized | Breast cancer   | Rate | 64.01826147 |
| Incidence | Tokelau                          | Age-standardized | Cervical cancer | Rate | 33.61533075 |
| Incidence | Tokelau                          | Age-standardized | Uterine cancer  | Rate | 17.07634713 |
| Incidence | Tokelau                          | Age-standardized | Ovarian cancer  | Rate | 6.355523174 |
| Incidence | Switzerland                      | Age-standardized | Breast cancer   | Rate | 77.46725554 |
| Incidence | Switzerland                      | Age-standardized | Cervical cancer | Rate | 5.733613321 |
| Incidence | Switzerland                      | Age-standardized | Uterine cancer  | Rate | 13.50592775 |
| Incidence | Zambia                           | Age-standardized | Breast cancer   | Rate | 27.34686069 |
| Incidence | Zambia                           | Age-standardized | Cervical cancer | Rate | 43.37312116 |
| Incidence | Zambia                           | Age-standardized | Uterine cancer  | Rate | 5.230407336 |
| Incidence | Barbados                         | Age-standardized | Ovarian cancer  | Rate | 9.950753333 |
| Incidence | Australia                        | Age-standardized | Ovarian cancer  | Rate | 8.06251445  |
| Incidence | Barbados                         | Age-standardized | Breast cancer   | Rate | 102.3095459 |
| Incidence | Barbados                         | Age-standardized | Cervical cancer | Rate | 27.97281949 |
| Incidence | Barbados                         | Age-standardized | Uterine cancer  | Rate | 24.28288372 |
| Incidence | Turkey                           | Age-standardized | Cervical cancer | Rate | 4.671283363 |
| Incidence | Turkey                           | Age-standardized | Uterine cancer  | Rate | 8.879514884 |
| Incidence | Turkey                           | Age-standardized | Ovarian cancer  | Rate | 6.693850519 |
| Incidence | Switzerland                      | Age-standardized | Ovarian cancer  | Rate | 8.671004833 |
| Incidence | Ethiopia                         | Age-standardized | Uterine cancer  | Rate | 2.840674123 |
| Incidence | Ethiopia                         | Age-standardized | Ovarian cancer  | Rate | 5.216037104 |
| Incidence | Latvia                           | Age-standardized | Breast cancer   | Rate | 55.60239336 |
| Incidence | Lao People's Democratic Republic | Age-standardized | Ovarian cancer  | Rate | 7.925679071 |
| Incidence | Republic of Moldova              | Age-standardized | Breast cancer   | Rate | 39.16233108 |

|           |                                    |                  |                 |      |             |
|-----------|------------------------------------|------------------|-----------------|------|-------------|
| Incidence | Republic of Moldova                | Age-standardized | Cervical cancer | Rate | 14.76757514 |
| Incidence | Republic of Moldova                | Age-standardized | Uterine cancer  | Rate | 14.33287034 |
| Incidence | Latvia                             | Age-standardized | Cervical cancer | Rate | 8.677501959 |
| Incidence | Latvia                             | Age-standardized | Uterine cancer  | Rate | 29.10305269 |
| Incidence | Ethiopia                           | Age-standardized | Breast cancer   | Rate | 23.00114631 |
| Incidence | Ethiopia                           | Age-standardized | Cervical cancer | Rate | 24.59817863 |
| Incidence | Venezuela (Bolivarian Republic of) | Age-standardized | Breast cancer   | Rate | 52.99779692 |
| Incidence | Venezuela (Bolivarian Republic of) | Age-standardized | Cervical cancer | Rate | 34.35511956 |
| Incidence | Venezuela (Bolivarian Republic of) | Age-standardized | Uterine cancer  | Rate | 9.232904331 |
| Incidence | Côte d'Ivoire                      | Age-standardized | Ovarian cancer  | Rate | 4.03822087  |
| Incidence | United Kingdom                     | Age-standardized | Ovarian cancer  | Rate | 13.22206806 |
| Incidence | Greece                             | Age-standardized | Ovarian cancer  | Rate | 10.17649069 |
| Incidence | Papua New Guinea                   | Age-standardized | Breast cancer   | Rate | 64.51505016 |
| Incidence | Papua New Guinea                   | Age-standardized | Cervical cancer | Rate | 23.52128265 |
| Incidence | Papua New Guinea                   | Age-standardized | Uterine cancer  | Rate | 6.658957223 |
| Incidence | Cuba                               | Age-standardized | Ovarian cancer  | Rate | 6.162684787 |
| Incidence | Bolivia (Plurinational State of)   | Age-standardized | Breast cancer   | Rate | 34.52096949 |
| Incidence | Bolivia (Plurinational State of)   | Age-standardized | Cervical cancer | Rate | 41.59027083 |
| Incidence | Bolivia (Plurinational State of)   | Age-standardized | Uterine cancer  | Rate | 10.85559302 |
| Incidence | Bolivia (Plurinational State of)   | Age-standardized | Ovarian cancer  | Rate | 6.282496069 |
| Incidence | Venezuela (Bolivarian Republic of) | Age-standardized | Ovarian cancer  | Rate | 7.30002257  |
| Incidence | Iraq                               | Age-standardized | Breast cancer   | Rate | 51.99932362 |
| Incidence | Iraq                               | Age-standardized | Cervical cancer | Rate | 4.607115862 |
| Incidence | Iraq                               | Age-standardized | Uterine cancer  | Rate | 6.740470966 |
| Incidence | Papua New Guinea                   | Age-standardized | Ovarian cancer  | Rate | 3.7029215   |
| Incidence | Iraq                               | Age-standardized | Ovarian cancer  | Rate | 6.027961896 |
| Incidence | Eritrea                            | Age-standardized | Cervical cancer | Rate | 44.96290565 |
| Incidence | Eritrea                            | Age-standardized | Uterine cancer  | Rate | 4.905092045 |
| Incidence | Eritrea                            | Age-standardized | Ovarian cancer  | Rate | 6.426615116 |
| Incidence | Tuvalu                             | Age-standardized | Ovarian cancer  | Rate | 6.916858782 |
| Incidence | Kyrgyzstan                         | Age-standardized | Cervical cancer | Rate | 18.27181707 |
| Incidence | Kyrgyzstan                         | Age-standardized | Uterine cancer  | Rate | 9.434636812 |
| Incidence | United Arab Emirates               | Age-standardized | Breast cancer   | Rate | 57.47842292 |
| Incidence | United Arab Emirates               | Age-standardized | Cervical cancer | Rate | 10.81790837 |
| Incidence | United Arab Emirates               | Age-standardized | Uterine cancer  | Rate | 4.72367303  |
| Incidence | Guam                               | Age-standardized | Ovarian cancer  | Rate | 6.718842291 |
| Incidence | Chad                               | Age-standardized | Breast cancer   | Rate | 17.69635578 |
| Incidence | Chad                               | Age-standardized | Cervical cancer | Rate | 35.474368   |
| Incidence | Chad                               | Age-standardized | Uterine cancer  | Rate | 3.274843032 |
| Incidence | Kyrgyzstan                         | Age-standardized | Ovarian cancer  | Rate | 7.025212772 |
| Incidence | Angola                             | Age-standardized | Breast cancer   | Rate | 26.42691462 |
| Incidence | Angola                             | Age-standardized | Cervical cancer | Rate | 30.30809741 |
| Incidence | Angola                             | Age-standardized | Uterine cancer  | Rate | 3.113490363 |
| Incidence | Zambia                             | Age-standardized | Ovarian cancer  | Rate | 7.531726469 |
| Incidence | Argentina                          | Age-standardized | Ovarian cancer  | Rate | 8.956709007 |
| Incidence | Senegal                            | Age-standardized | Ovarian cancer  | Rate | 4.130869329 |
| Incidence | Chad                               | Age-standardized | Ovarian cancer  | Rate | 2.248558643 |
| Incidence | Iceland                            | Age-standardized | Breast cancer   | Rate | 67.50004565 |
| Incidence | Iceland                            | Age-standardized | Cervical cancer | Rate | 5.774425631 |
| Incidence | Iceland                            | Age-standardized | Uterine cancer  | Rate | 13.34575543 |
| Incidence | Jordan                             | Age-standardized | Breast cancer   | Rate | 52.94732794 |
| Incidence | Jordan                             | Age-standardized | Cervical cancer | Rate | 4.02530361  |
| Incidence | Jordan                             | Age-standardized | Uterine cancer  | Rate | 7.354627944 |
| Incidence | Iceland                            | Age-standardized | Ovarian cancer  | Rate | 9.412084351 |
| Incidence | Kenya                              | Age-standardized | Ovarian cancer  | Rate | 5.44731096  |
| Incidence | Malaysia                           | Age-standardized | Uterine cancer  | Rate | 9.141824699 |
| Incidence | Malaysia                           | Age-standardized | Ovarian cancer  | Rate | 8.102190478 |
| Incidence | Angola                             | Age-standardized | Ovarian cancer  | Rate | 3.271537849 |

|           |                                  |                  |                 |      |             |
|-----------|----------------------------------|------------------|-----------------|------|-------------|
| Incidence | North Macedonia                  | Age-standardized | Ovarian cancer  | Rate | 10.81429727 |
| Incidence | Belize                           | Age-standardized | Breast cancer   | Rate | 26.98872414 |
| Incidence | Belize                           | Age-standardized | Cervical cancer | Rate | 35.7807544  |
| Incidence | Belize                           | Age-standardized | Uterine cancer  | Rate | 11.82858546 |
| Incidence | Belize                           | Age-standardized | Ovarian cancer  | Rate | 4.20351176  |
| Incidence | Tajikistan                       | Age-standardized | Ovarian cancer  | Rate | 5.482414605 |
| Incidence | Australia                        | Age-standardized | Breast cancer   | Rate | 81.54826484 |
| Incidence | Senegal                          | Age-standardized | Breast cancer   | Rate | 29.11116039 |
| Incidence | Senegal                          | Age-standardized | Cervical cancer | Rate | 29.88253575 |
| Incidence | Senegal                          | Age-standardized | Uterine cancer  | Rate | 3.772541815 |
| Incidence | Tuvalu                           | Age-standardized | Breast cancer   | Rate | 57.89126583 |
| Incidence | Tuvalu                           | Age-standardized | Cervical cancer | Rate | 32.26137395 |
| Incidence | Tuvalu                           | Age-standardized | Uterine cancer  | Rate | 13.5117902  |
| Incidence | Chile                            | Age-standardized | Uterine cancer  | Rate | 7.96041825  |
| Incidence | Micronesia (Federated States of) | Age-standardized | Breast cancer   | Rate | 66.07648018 |
| Incidence | Nicaragua                        | Age-standardized | Breast cancer   | Rate | 32.84774281 |
| Incidence | Nicaragua                        | Age-standardized | Cervical cancer | Rate | 29.75808125 |
| Incidence | Nicaragua                        | Age-standardized | Uterine cancer  | Rate | 5.122116195 |
| Incidence | Congo                            | Age-standardized | Ovarian cancer  | Rate | 4.87549543  |
| Incidence | Chile                            | Age-standardized | Ovarian cancer  | Rate | 7.326335003 |
| Incidence | Gambia                           | Age-standardized | Breast cancer   | Rate | 17.02413183 |
| Incidence | Gambia                           | Age-standardized | Cervical cancer | Rate | 26.10305776 |
| Incidence | Kenya                            | Age-standardized | Breast cancer   | Rate | 22.96392347 |
| Incidence | Kenya                            | Age-standardized | Cervical cancer | Rate | 18.29675971 |
| Incidence | Kenya                            | Age-standardized | Uterine cancer  | Rate | 2.236831654 |
| Incidence | Gambia                           | Age-standardized | Uterine cancer  | Rate | 2.968758939 |
| Incidence | Gambia                           | Age-standardized | Ovarian cancer  | Rate | 4.352051065 |
| Incidence | Lao People's Democratic Republic | Age-standardized | Breast cancer   | Rate | 31.24391981 |
| Incidence | Lao People's Democratic Republic | Age-standardized | Cervical cancer | Rate | 15.68554774 |
| Incidence | Lao People's Democratic Republic | Age-standardized | Uterine cancer  | Rate | 6.174447308 |
| Incidence | Botswana                         | Age-standardized | Breast cancer   | Rate | 49.01923555 |
| Incidence | Botswana                         | Age-standardized | Cervical cancer | Rate | 47.63494291 |
| Incidence | Botswana                         | Age-standardized | Uterine cancer  | Rate | 7.773827303 |
| Incidence | Italy                            | Age-standardized | Ovarian cancer  | Rate | 9.686902281 |
| Incidence | Dominica                         | Age-standardized | Breast cancer   | Rate | 65.38252278 |
| Incidence | Cote d'Ivoire                    | Age-standardized | Breast cancer   | Rate | 21.38997937 |
| Incidence | Cote d'Ivoire                    | Age-standardized | Cervical cancer | Rate | 28.23527685 |
| Incidence | Cote d'Ivoire                    | Age-standardized | Uterine cancer  | Rate | 3.409072113 |
| Incidence | Yemen                            | Age-standardized | Breast cancer   | Rate | 22.67600332 |
| Incidence | Yemen                            | Age-standardized | Cervical cancer | Rate | 6.386100609 |
| Incidence | Yemen                            | Age-standardized | Uterine cancer  | Rate | 2.060063997 |
| Incidence | Ecuador                          | Age-standardized | Ovarian cancer  | Rate | 7.252952717 |
| Incidence | Ecuador                          | Age-standardized | Breast cancer   | Rate | 31.025675   |
| Incidence | Ecuador                          | Age-standardized | Cervical cancer | Rate | 27.2013876  |
| Incidence | Ecuador                          | Age-standardized | Uterine cancer  | Rate | 10.80097136 |
| Incidence | Uruguay                          | Age-standardized | Breast cancer   | Rate | 72.6450292  |
| Incidence | Uruguay                          | Age-standardized | Cervical cancer | Rate | 21.81104411 |
| Incidence | Uruguay                          | Age-standardized | Uterine cancer  | Rate | 8.097119546 |
| Incidence | Turkmenistan                     | Age-standardized | Breast cancer   | Rate | 28.78704291 |
| Incidence | Turkmenistan                     | Age-standardized | Cervical cancer | Rate | 15.59449484 |
| Incidence | Turkmenistan                     | Age-standardized | Uterine cancer  | Rate | 3.147715464 |
| Incidence | Samoa                            | Age-standardized | Breast cancer   | Rate | 43.98371296 |
| Incidence | Samoa                            | Age-standardized | Cervical cancer | Rate | 25.68444052 |
| Incidence | Samoa                            | Age-standardized | Uterine cancer  | Rate | 11.46733941 |
| Incidence | Andorra                          | Age-standardized | Breast cancer   | Rate | 80.62848194 |
| Incidence | Andorra                          | Age-standardized | Cervical cancer | Rate | 12.48514086 |
| Incidence | Andorra                          | Age-standardized | Uterine cancer  | Rate | 22.38504859 |
| Incidence | Andorra                          | Age-standardized | Ovarian cancer  | Rate | 7.487019185 |

|           |                                  |                  |                 |      |             |
|-----------|----------------------------------|------------------|-----------------|------|-------------|
| Incidence | Madagascar                       | Age-standardized | Ovarian cancer  | Rate | 4.934277113 |
| Incidence | Nicaragua                        | Age-standardized | Ovarian cancer  | Rate | 5.457611345 |
| Incidence | Turkmenistan                     | Age-standardized | Ovarian cancer  | Rate | 5.431788783 |
| Incidence | Dominica                         | Age-standardized | Cervical cancer | Rate | 33.46095075 |
| Incidence | Dominica                         | Age-standardized | Uterine cancer  | Rate | 10.54013697 |
| Incidence | Dominica                         | Age-standardized | Ovarian cancer  | Rate | 4.869728442 |
| Incidence | Ireland                          | Age-standardized | Breast cancer   | Rate | 94.95522227 |
| Incidence | Ireland                          | Age-standardized | Cervical cancer | Rate | 9.63711621  |
| Incidence | Ireland                          | Age-standardized | Uterine cancer  | Rate | 21.12214305 |
| Incidence | Montenegro                       | Age-standardized | Ovarian cancer  | Rate | 9.4457703   |
| Incidence | United States Virgin Islands     | Age-standardized | Breast cancer   | Rate | 74.54435947 |
| Incidence | United States Virgin Islands     | Age-standardized | Cervical cancer | Rate | 15.45904389 |
| Incidence | United States Virgin Islands     | Age-standardized | Uterine cancer  | Rate | 12.0152802  |
| Incidence | Poland                           | Age-standardized | Breast cancer   | Rate | 55.53771451 |
| Incidence | Poland                           | Age-standardized | Cervical cancer | Rate | 10.52682251 |
| Incidence | Poland                           | Age-standardized | Uterine cancer  | Rate | 20.89726955 |
| Incidence | Afghanistan                      | Age-standardized | Breast cancer   | Rate | 22.28219032 |
| Incidence | Afghanistan                      | Age-standardized | Cervical cancer | Rate | 11.3859649  |
| Incidence | Afghanistan                      | Age-standardized | Uterine cancer  | Rate | 3.055925692 |
| Incidence | Afghanistan                      | Age-standardized | Ovarian cancer  | Rate | 3.65496966  |
| Incidence | Uruguay                          | Age-standardized | Ovarian cancer  | Rate | 9.605871627 |
| Incidence | Jordan                           | Age-standardized | Ovarian cancer  | Rate | 5.420452143 |
| Incidence | Peru                             | Age-standardized | Breast cancer   | Rate | 27.63306751 |
| Incidence | Cuba                             | Age-standardized | Breast cancer   | Rate | 59.3760467  |
| Incidence | Cuba                             | Age-standardized | Cervical cancer | Rate | 19.25153145 |
| Incidence | Cuba                             | Age-standardized | Uterine cancer  | Rate | 26.49183764 |
| Incidence | Mongolia                         | Age-standardized | Breast cancer   | Rate | 17.86387379 |
| Incidence | Mongolia                         | Age-standardized | Cervical cancer | Rate | 20.96516585 |
| Incidence | Mongolia                         | Age-standardized | Uterine cancer  | Rate | 6.716486027 |
| Incidence | Mongolia                         | Age-standardized | Ovarian cancer  | Rate | 6.135633233 |
| Incidence | Maldives                         | Age-standardized | Breast cancer   | Rate | 33.75180605 |
| Incidence | Maldives                         | Age-standardized | Cervical cancer | Rate | 8.781285973 |
| Incidence | Maldives                         | Age-standardized | Uterine cancer  | Rate | 4.867298513 |
| Incidence | United States Virgin Islands     | Age-standardized | Ovarian cancer  | Rate | 14.13272887 |
| Incidence | Peru                             | Age-standardized | Cervical cancer | Rate | 27.64069326 |
| Incidence | Peru                             | Age-standardized | Uterine cancer  | Rate | 8.983432489 |
| Incidence | Peru                             | Age-standardized | Ovarian cancer  | Rate | 7.218731295 |
| Incidence | Kuwait                           | Age-standardized | Breast cancer   | Rate | 42.76946455 |
| Incidence | Kuwait                           | Age-standardized | Cervical cancer | Rate | 3.615961945 |
| Incidence | Austria                          | Age-standardized | Breast cancer   | Rate | 69.85950797 |
| Incidence | Austria                          | Age-standardized | Cervical cancer | Rate | 7.280623463 |
| Incidence | Austria                          | Age-standardized | Uterine cancer  | Rate | 16.62405018 |
| Incidence | Botswana                         | Age-standardized | Ovarian cancer  | Rate | 8.110543098 |
| Incidence | Paraguay                         | Age-standardized | Breast cancer   | Rate | 44.32550097 |
| Incidence | Paraguay                         | Age-standardized | Cervical cancer | Rate | 34.25907915 |
| Incidence | Paraguay                         | Age-standardized | Uterine cancer  | Rate | 9.018815639 |
| Incidence | Dominican Republic               | Age-standardized | Breast cancer   | Rate | 36.11805865 |
| Incidence | Dominican Republic               | Age-standardized | Cervical cancer | Rate | 25.40478199 |
| Incidence | Dominican Republic               | Age-standardized | Uterine cancer  | Rate | 13.78671002 |
| Incidence | Argentina                        | Age-standardized | Breast cancer   | Rate | 62.71964927 |
| Incidence | Argentina                        | Age-standardized | Cervical cancer | Rate | 28.02362636 |
| Incidence | South Africa                     | Age-standardized | Breast cancer   | Rate | 32.07965711 |
| Incidence | South Africa                     | Age-standardized | Cervical cancer | Rate | 29.19011072 |
| Incidence | South Africa                     | Age-standardized | Uterine cancer  | Rate | 4.357886527 |
| Incidence | Ghana                            | Age-standardized | Breast cancer   | Rate | 45.06228754 |
| Incidence | Ghana                            | Age-standardized | Cervical cancer | Rate | 27.6513183  |
| Incidence | Ghana                            | Age-standardized | Uterine cancer  | Rate | 4.928898522 |
| Incidence | Democratic Republic of the Congo | Age-standardized | Uterine cancer  | Rate | 2.815251166 |



|           |                                  |                  |                 |      |             |
|-----------|----------------------------------|------------------|-----------------|------|-------------|
| Incidence | Bangladesh                       | Age-standardized | Breast cancer   | Rate | 25.03097675 |
| Incidence | Bangladesh                       | Age-standardized | Cervical cancer | Rate | 10.06821801 |
| Incidence | Bangladesh                       | Age-standardized | Uterine cancer  | Rate | 1.901040674 |
| Incidence | Argentina                        | Age-standardized | Uterine cancer  | Rate | 8.355500604 |
| Incidence | South Africa                     | Age-standardized | Ovarian cancer  | Rate | 6.13989297  |
| Incidence | Myanmar                          | Age-standardized | Ovarian cancer  | Rate | 8.101057356 |
| Incidence | Samoa                            | Age-standardized | Ovarian cancer  | Rate | 13.11838431 |
| Incidence | Uzbekistan                       | Age-standardized | Breast cancer   | Rate | 37.26799389 |
| Incidence | Uzbekistan                       | Age-standardized | Cervical cancer | Rate | 17.26153484 |
| Incidence | Uzbekistan                       | Age-standardized | Uterine cancer  | Rate | 10.21865363 |
| Incidence | Central African Republic         | Age-standardized | Breast cancer   | Rate | 23.73665417 |
| Incidence | Central African Republic         | Age-standardized | Cervical cancer | Rate | 40.67569462 |
| Incidence | Central African Republic         | Age-standardized | Uterine cancer  | Rate | 2.860982487 |
| Incidence | Central African Republic         | Age-standardized | Ovarian cancer  | Rate | 2.658773906 |
| Incidence | Maldives                         | Age-standardized | Ovarian cancer  | Rate | 9.97735615  |
| Incidence | Romania                          | Age-standardized | Breast cancer   | Rate | 50.91875901 |
| Incidence | Romania                          | Age-standardized | Cervical cancer | Rate | 27.36052291 |
| Incidence | Romania                          | Age-standardized | Uterine cancer  | Rate | 15.63330278 |
| Incidence | Romania                          | Age-standardized | Ovarian cancer  | Rate | 10.34951999 |
| Incidence | Malaysia                         | Age-standardized | Breast cancer   | Rate | 59.47933321 |
| Incidence | Malaysia                         | Age-standardized | Cervical cancer | Rate | 17.91815362 |
| Incidence | Panama                           | Age-standardized | Breast cancer   | Rate | 43.13032768 |
| Incidence | Panama                           | Age-standardized | Cervical cancer | Rate | 22.51973162 |
| Incidence | Panama                           | Age-standardized | Uterine cancer  | Rate | 9.744422721 |
| Incidence | Sierra Leone                     | Age-standardized | Breast cancer   | Rate | 24.01943421 |
| Incidence | Sierra Leone                     | Age-standardized | Cervical cancer | Rate | 34.00416602 |
| Incidence | Sierra Leone                     | Age-standardized | Uterine cancer  | Rate | 3.596877969 |
| Incidence | Sierra Leone                     | Age-standardized | Ovarian cancer  | Rate | 3.626956401 |
| Incidence | Austria                          | Age-standardized | Ovarian cancer  | Rate | 9.621661113 |
| Incidence | Chile                            | Age-standardized | Breast cancer   | Rate | 39.39153356 |
| Incidence | Chile                            | Age-standardized | Cervical cancer | Rate | 18.07657141 |
| Incidence | Ireland                          | Age-standardized | Ovarian cancer  | Rate | 12.83899529 |
| Incidence | Guinea-Bissau                    | Age-standardized | Ovarian cancer  | Rate | 4.284273173 |
| Incidence | Malawi                           | Age-standardized | Breast cancer   | Rate | 22.16693799 |
| Incidence | Malawi                           | Age-standardized | Cervical cancer | Rate | 39.79685305 |
| Incidence | Malawi                           | Age-standardized | Uterine cancer  | Rate | 2.141522415 |
| Incidence | Poland                           | Age-standardized | Ovarian cancer  | Rate | 12.77549334 |
| Incidence | Kuwait                           | Age-standardized | Uterine cancer  | Rate | 10.03009028 |
| Incidence | Democratic Republic of the Congo | Age-standardized | Ovarian cancer  | Rate | 2.975176861 |
| Incidence | Lesotho                          | Age-standardized | Breast cancer   | Rate | 36.99560249 |
| Incidence | Lesotho                          | Age-standardized | Cervical cancer | Rate | 52.76661703 |
| Incidence | Lesotho                          | Age-standardized | Uterine cancer  | Rate | 5.757214611 |
| Incidence | Israel                           | Age-standardized | Breast cancer   | Rate | 78.82001629 |
| Incidence | Israel                           | Age-standardized | Cervical cancer | Rate | 6.646674763 |
| Incidence | Israel                           | Age-standardized | Uterine cancer  | Rate | 15.71411936 |
| Incidence | Serbia                           | Age-standardized | Breast cancer   | Rate | 83.47500694 |
| Incidence | Serbia                           | Age-standardized | Cervical cancer | Rate | 22.27284112 |
| Incidence | Serbia                           | Age-standardized | Uterine cancer  | Rate | 23.04380937 |
| Incidence | Congo                            | Age-standardized | Breast cancer   | Rate | 40.46661818 |
| Incidence | Congo                            | Age-standardized | Cervical cancer | Rate | 37.2352968  |
| Incidence | Congo                            | Age-standardized | Uterine cancer  | Rate | 4.526341971 |
| Incidence | Uzbekistan                       | Age-standardized | Ovarian cancer  | Rate | 5.35735531  |
| Incidence | Malawi                           | Age-standardized | Ovarian cancer  | Rate | 5.083391135 |
| Incidence | Grenada                          | Age-standardized | Breast cancer   | Rate | 70.94446875 |
| Incidence | Grenada                          | Age-standardized | Cervical cancer | Rate | 34.27508703 |
| Incidence | Namibia                          | Age-standardized | Ovarian cancer  | Rate | 4.892680762 |
| Incidence | Monaco                           | Age-standardized | Breast cancer   | Rate | 149.5993757 |
| Incidence | Monaco                           | Age-standardized | Cervical cancer | Rate | 8.474504539 |

|           |                                  |                  |                 |      |             |
|-----------|----------------------------------|------------------|-----------------|------|-------------|
| Incidence | Monaco                           | Age-standardized | Uterine cancer  | Rate | 9.926544103 |
| Incidence | Togo                             | Age-standardized | Ovarian cancer  | Rate | 3.86186408  |
| Incidence | Tajikistan                       | Age-standardized | Breast cancer   | Rate | 26.02643366 |
| Incidence | Tajikistan                       | Age-standardized | Cervical cancer | Rate | 7.648206139 |
| Incidence | Tajikistan                       | Age-standardized | Uterine cancer  | Rate | 10.4454641  |
| Incidence | Kuwait                           | Age-standardized | Ovarian cancer  | Rate | 5.678955309 |
| Incidence | Russian Federation               | Age-standardized | Breast cancer   | Rate | 54.38933506 |
| Incidence | Russian Federation               | Age-standardized | Cervical cancer | Rate | 15.65956369 |
| Incidence | Russian Federation               | Age-standardized | Uterine cancer  | Rate | 32.55354269 |
| Incidence | Russian Federation               | Age-standardized | Ovarian cancer  | Rate | 10.93985289 |
| Incidence | Equatorial Guinea                | Age-standardized | Breast cancer   | Rate | 38.9936381  |
| Incidence | Lesotho                          | Age-standardized | Ovarian cancer  | Rate | 7.649169905 |
| Incidence | Madagascar                       | Age-standardized | Breast cancer   | Rate | 21.91256141 |
| Incidence | Madagascar                       | Age-standardized | Cervical cancer | Rate | 33.53925819 |
| Incidence | Madagascar                       | Age-standardized | Uterine cancer  | Rate | 3.579634724 |
| Incidence | Colombia                         | Age-standardized | Breast cancer   | Rate | 39.41000526 |
| Incidence | Colombia                         | Age-standardized | Cervical cancer | Rate | 18.72736542 |
| Incidence | Colombia                         | Age-standardized | Uterine cancer  | Rate | 6.009585828 |
| Incidence | Brazil                           | Age-standardized | Ovarian cancer  | Rate | 6.14349648  |
| Incidence | Canada                           | Age-standardized | Breast cancer   | Rate | 90.09877345 |
| Incidence | Canada                           | Age-standardized | Cervical cancer | Rate | 11.25501897 |
| Incidence | Canada                           | Age-standardized | Uterine cancer  | Rate | 19.561251   |
| Incidence | Ghana                            | Age-standardized | Ovarian cancer  | Rate | 5.031045072 |
| Incidence | Palau                            | Age-standardized | Ovarian cancer  | Rate | 4.717160829 |
| Incidence | Gabon                            | Age-standardized | Ovarian cancer  | Rate | 6.315136615 |
| Incidence | Libya                            | Age-standardized | Ovarian cancer  | Rate | 7.326324988 |
| Incidence | Monaco                           | Age-standardized | Ovarian cancer  | Rate | 22.74574966 |
| Incidence | Israel                           | Age-standardized | Ovarian cancer  | Rate | 9.470102596 |
| Incidence | Solomon Islands                  | Age-standardized | Breast cancer   | Rate | 126.4800192 |
| Incidence | Solomon Islands                  | Age-standardized | Cervical cancer | Rate | 56.99714453 |
| Incidence | Solomon Islands                  | Age-standardized | Uterine cancer  | Rate | 17.33864692 |
| Incidence | Solomon Islands                  | Age-standardized | Ovarian cancer  | Rate | 5.967957652 |
| Incidence | Colombia                         | Age-standardized | Ovarian cancer  | Rate | 7.633286427 |
| Incidence | Mauritius                        | Age-standardized | Breast cancer   | Rate | 53.47746926 |
| Incidence | Mauritius                        | Age-standardized | Cervical cancer | Rate | 12.09348211 |
| Incidence | Mauritius                        | Age-standardized | Uterine cancer  | Rate | 12.24744759 |
| Incidence | Brazil                           | Age-standardized | Breast cancer   | Rate | 39.64462081 |
| Incidence | Brazil                           | Age-standardized | Cervical cancer | Rate | 17.50776571 |
| Incidence | Brazil                           | Age-standardized | Uterine cancer  | Rate | 6.924003785 |
| Incidence | Belgium                          | Age-standardized | Breast cancer   | Rate | 95.21328087 |
| Incidence | Belgium                          | Age-standardized | Cervical cancer | Rate | 7.494818895 |
| Incidence | Belgium                          | Age-standardized | Uterine cancer  | Rate | 18.13289555 |
| Incidence | Belgium                          | Age-standardized | Ovarian cancer  | Rate | 9.609441637 |
| Incidence | Liberia                          | Age-standardized | Ovarian cancer  | Rate | 4.449662016 |
| Incidence | Ukraine                          | Age-standardized | Breast cancer   | Rate | 45.04014007 |
| Incidence | Ukraine                          | Age-standardized | Cervical cancer | Rate | 11.90917336 |
| Incidence | Ukraine                          | Age-standardized | Uterine cancer  | Rate | 16.19323539 |
| Incidence | Morocco                          | Age-standardized | Breast cancer   | Rate | 52.51540785 |
| Incidence | Morocco                          | Age-standardized | Cervical cancer | Rate | 14.0294662  |
| Incidence | Morocco                          | Age-standardized | Uterine cancer  | Rate | 4.43904702  |
| Incidence | Morocco                          | Age-standardized | Ovarian cancer  | Rate | 7.728204263 |
| Incidence | Seychelles                       | Age-standardized | Ovarian cancer  | Rate | 15.65792823 |
| Incidence | Democratic Republic of the Congo | Age-standardized | Breast cancer   | Rate | 28.78106748 |
| Incidence | Democratic Republic of the Congo | Age-standardized | Cervical cancer | Rate | 32.31062698 |
| Incidence | Togo                             | Age-standardized | Breast cancer   | Rate | 24.40983636 |
| Incidence | Togo                             | Age-standardized | Cervical cancer | Rate | 30.94165833 |
| Incidence | Togo                             | Age-standardized | Uterine cancer  | Rate | 3.566673451 |
| Incidence | Serbia                           | Age-standardized | Ovarian cancer  | Rate | 11.84440281 |

|           |                    |                  |                 |      |             |
|-----------|--------------------|------------------|-----------------|------|-------------|
| Incidence | Mauritius          | Age-standardized | Ovarian cancer  | Rate | 9.683051493 |
| Incidence | Mali               | Age-standardized | Breast cancer   | Rate | 23.16049569 |
| Incidence | Mali               | Age-standardized | Cervical cancer | Rate | 28.0732797  |
| Incidence | Mali               | Age-standardized | Uterine cancer  | Rate | 2.677717483 |
| Incidence | Namibia            | Age-standardized | Breast cancer   | Rate | 48.17409656 |
| Incidence | Namibia            | Age-standardized | Cervical cancer | Rate | 26.92772509 |
| Incidence | Namibia            | Age-standardized | Uterine cancer  | Rate | 4.355024394 |
| Incidence | Equatorial Guinea  | Age-standardized | Cervical cancer | Rate | 27.7410708  |
| Incidence | Equatorial Guinea  | Age-standardized | Uterine cancer  | Rate | 4.338546584 |
| Incidence | Equatorial Guinea  | Age-standardized | Ovarian cancer  | Rate | 5.095086258 |
| Incidence | Costa Rica         | Age-standardized | Breast cancer   | Rate | 54.17243339 |
| Incidence | Costa Rica         | Age-standardized | Cervical cancer | Rate | 16.62967018 |
| Incidence | Costa Rica         | Age-standardized | Uterine cancer  | Rate | 10.24930745 |
| Incidence | Nauru              | Age-standardized | Breast cancer   | Rate | 75.52082458 |
| Incidence | Nauru              | Age-standardized | Cervical cancer | Rate | 39.50121321 |
| Incidence | Nauru              | Age-standardized | Uterine cancer  | Rate | 19.899259   |
| Incidence | Ukraine            | Age-standardized | Ovarian cancer  | Rate | 11.11969888 |
| Incidence | Lebanon            | Age-standardized | Breast cancer   | Rate | 122.5146413 |
| Incidence | Lebanon            | Age-standardized | Cervical cancer | Rate | 6.078436937 |
| Incidence | Lebanon            | Age-standardized | Uterine cancer  | Rate | 12.6227175  |
| Incidence | Lebanon            | Age-standardized | Ovarian cancer  | Rate | 11.7761412  |
| Incidence | Mali               | Age-standardized | Ovarian cancer  | Rate | 2.497238714 |
| Incidence | Mozambique         | Age-standardized | Breast cancer   | Rate | 27.15416952 |
| Incidence | Mozambique         | Age-standardized | Cervical cancer | Rate | 43.2076628  |
| Incidence | Palestine          | Age-standardized | Breast cancer   | Rate | 57.13680877 |
| Incidence | Palestine          | Age-standardized | Cervical cancer | Rate | 4.664733054 |
| Incidence | Palestine          | Age-standardized | Uterine cancer  | Rate | 12.53720659 |
| Incidence | Nauru              | Age-standardized | Ovarian cancer  | Rate | 7.695459511 |
| Incidence | Niue               | Age-standardized | Ovarian cancer  | Rate | 8.555523901 |
| Incidence | Myanmar            | Age-standardized | Breast cancer   | Rate | 26.63705392 |
| Incidence | Myanmar            | Age-standardized | Cervical cancer | Rate | 14.25328413 |
| Incidence | Myanmar            | Age-standardized | Uterine cancer  | Rate | 6.015320796 |
| Incidence | Italy              | Age-standardized | Breast cancer   | Rate | 89.17135932 |
| Incidence | Italy              | Age-standardized | Cervical cancer | Rate | 7.567476617 |
| Incidence | Italy              | Age-standardized | Uterine cancer  | Rate | 26.93079571 |
| Incidence | Cyprus             | Age-standardized | Ovarian cancer  | Rate | 9.786931539 |
| Incidence | Philippines        | Age-standardized | Breast cancer   | Rate | 40.62580834 |
| Incidence | Philippines        | Age-standardized | Cervical cancer | Rate | 13.89529841 |
| Incidence | Philippines        | Age-standardized | Uterine cancer  | Rate | 7.118954589 |
| Incidence | Paraguay           | Age-standardized | Ovarian cancer  | Rate | 5.59741657  |
| Incidence | Luxembourg         | Age-standardized | Breast cancer   | Rate | 79.66442373 |
| Incidence | Luxembourg         | Age-standardized | Cervical cancer | Rate | 5.31790809  |
| Incidence | Luxembourg         | Age-standardized | Uterine cancer  | Rate | 21.75114025 |
| Incidence | South Sudan        | Age-standardized | Breast cancer   | Rate | 15.91351617 |
| Incidence | South Sudan        | Age-standardized | Cervical cancer | Rate | 25.59038883 |
| Incidence | South Sudan        | Age-standardized | Uterine cancer  | Rate | 3.280589635 |
| Incidence | Philippines        | Age-standardized | Ovarian cancer  | Rate | 9.90877478  |
| Incidence | Tonga              | Age-standardized | Ovarian cancer  | Rate | 6.262132611 |
| Incidence | Oman               | Age-standardized | Breast cancer   | Rate | 44.65997788 |
| Incidence | Mauritania         | Age-standardized | Breast cancer   | Rate | 26.41648079 |
| Incidence | Mauritania         | Age-standardized | Cervical cancer | Rate | 28.0066475  |
| Incidence | Mauritania         | Age-standardized | Uterine cancer  | Rate | 4.595966994 |
| Incidence | Dominican Republic | Age-standardized | Ovarian cancer  | Rate | 2.534486766 |
| Incidence | Bangladesh         | Age-standardized | Ovarian cancer  | Rate | 4.568704841 |
| Incidence | Gabon              | Age-standardized | Breast cancer   | Rate | 39.98456835 |
| Incidence | Gabon              | Age-standardized | Cervical cancer | Rate | 26.92516737 |
| Incidence | Gabon              | Age-standardized | Uterine cancer  | Rate | 4.468521992 |
| Incidence | South Sudan        | Age-standardized | Ovarian cancer  | Rate | 4.646265254 |

|           |                          |                  |                 |      |             |
|-----------|--------------------------|------------------|-----------------|------|-------------|
| Incidence | Guinea                   | Age-standardized | Breast cancer   | Rate | 24.64793678 |
| Incidence | Guinea                   | Age-standardized | Cervical cancer | Rate | 53.60568043 |
| Incidence | Guinea                   | Age-standardized | Uterine cancer  | Rate | 3.652155317 |
| Incidence | Eswatini                 | Age-standardized | Cervical cancer | Rate | 41.01538191 |
| Incidence | Eswatini                 | Age-standardized | Uterine cancer  | Rate | 5.311735035 |
| Incidence | Eswatini                 | Age-standardized | Ovarian cancer  | Rate | 8.020229226 |
| Incidence | Mozambique               | Age-standardized | Uterine cancer  | Rate | 4.067038332 |
| Incidence | Mozambique               | Age-standardized | Ovarian cancer  | Rate | 5.997402272 |
| Incidence | Canada                   | Age-standardized | Ovarian cancer  | Rate | 9.371436104 |
| Incidence | Cyprus                   | Age-standardized | Breast cancer   | Rate | 101.3340381 |
| Incidence | Cyprus                   | Age-standardized | Cervical cancer | Rate | 6.488990372 |
| Incidence | Cyprus                   | Age-standardized | Uterine cancer  | Rate | 20.5364513  |
| Incidence | Palestine                | Age-standardized | Ovarian cancer  | Rate | 6.61833329  |
| Incidence | Grenada                  | Age-standardized | Uterine cancer  | Rate | 29.41181647 |
| Incidence | Luxembourg               | Age-standardized | Ovarian cancer  | Rate | 11.41386217 |
| Incidence | Northern Mariana Islands | Age-standardized | Breast cancer   | Rate | 65.55463404 |
| Incidence | Northern Mariana Islands | Age-standardized | Cervical cancer | Rate | 36.16932889 |
| Incidence | Northern Mariana Islands | Age-standardized | Uterine cancer  | Rate | 32.76676489 |
| Incidence | Northern Mariana Islands | Age-standardized | Ovarian cancer  | Rate | 7.75407295  |
| Incidence | Grenada                  | Age-standardized | Ovarian cancer  | Rate | 11.23635342 |
| Incidence | Libya                    | Age-standardized | Breast cancer   | Rate | 41.43853949 |
| Incidence | Libya                    | Age-standardized | Cervical cancer | Rate | 8.289111761 |
| Incidence | Libya                    | Age-standardized | Uterine cancer  | Rate | 5.912816944 |
| Incidence | Bhutan                   | Age-standardized | Breast cancer   | Rate | 20.86618985 |
| Incidence | Bhutan                   | Age-standardized | Cervical cancer | Rate | 12.93690289 |
| Incidence | Bhutan                   | Age-standardized | Uterine cancer  | Rate | 3.048056507 |
| Incidence | Bhutan                   | Age-standardized | Ovarian cancer  | Rate | 6.839969306 |
| Incidence | Guinea                   | Age-standardized | Ovarian cancer  | Rate | 5.198977512 |
| Incidence | Oman                     | Age-standardized | Cervical cancer | Rate | 5.937067301 |
| Incidence | Oman                     | Age-standardized | Uterine cancer  | Rate | 3.852887459 |
| Incidence | Oman                     | Age-standardized | Ovarian cancer  | Rate | 6.849193094 |
| Incidence | Guyana                   | Age-standardized | Breast cancer   | Rate | 49.42461515 |
| Incidence | Guyana                   | Age-standardized | Cervical cancer | Rate | 38.84534467 |
| Incidence | Guyana                   | Age-standardized | Uterine cancer  | Rate | 14.78991241 |
| Incidence | Guyana                   | Age-standardized | Ovarian cancer  | Rate | 11.84323657 |
| Incidence | Zimbabwe                 | Age-standardized | Breast cancer   | Rate | 37.62948833 |
| Incidence | Zimbabwe                 | Age-standardized | Cervical cancer | Rate | 48.94584633 |
| Incidence | Zimbabwe                 | Age-standardized | Uterine cancer  | Rate | 8.960742821 |
| Incidence | Niue                     | Age-standardized | Breast cancer   | Rate | 67.62880895 |
| Incidence | Niue                     | Age-standardized | Cervical cancer | Rate | 24.90884489 |
| Incidence | Niue                     | Age-standardized | Uterine cancer  | Rate | 17.92314644 |
| Incidence | Malta                    | Age-standardized | Breast cancer   | Rate | 80.51689353 |
| Incidence | Malta                    | Age-standardized | Cervical cancer | Rate | 4.942845613 |
| Incidence | Mauritania               | Age-standardized | Ovarian cancer  | Rate | 4.988226926 |
| Incidence | Malta                    | Age-standardized | Uterine cancer  | Rate | 17.31802202 |
| Incidence | Zimbabwe                 | Age-standardized | Ovarian cancer  | Rate | 9.745830174 |
| Incidence | Guinea-Bissau            | Age-standardized | Breast cancer   | Rate | 29.45010027 |
| Incidence | Guinea-Bissau            | Age-standardized | Cervical cancer | Rate | 44.76757739 |
| Incidence | Guinea-Bissau            | Age-standardized | Uterine cancer  | Rate | 4.242374043 |
| Incidence | Malta                    | Age-standardized | Ovarian cancer  | Rate | 11.42630601 |
| Incidence | Eswatini                 | Age-standardized | Breast cancer   | Rate | 31.60797289 |
| Incidence | Palau                    | Age-standardized | Breast cancer   | Rate | 75.30053094 |
| Incidence | Palau                    | Age-standardized | Cervical cancer | Rate | 66.57855531 |
| Incidence | Palau                    | Age-standardized | Uterine cancer  | Rate | 1.996828575 |
| Incidence | Rwanda                   | Age-standardized | Breast cancer   | Rate | 27.26336588 |
| Incidence | Rwanda                   | Age-standardized | Cervical cancer | Rate | 32.38649397 |
| Incidence | Rwanda                   | Age-standardized | Uterine cancer  | Rate | 4.057266619 |
| Incidence | Rwanda                   | Age-standardized | Ovarian cancer  | Rate | 7.894166734 |

|               |                                  |                  |                 |      |             |
|---------------|----------------------------------|------------------|-----------------|------|-------------|
| Incidence     | Liberia                          | Age-standardized | Breast cancer   | Rate | 25.5063389  |
| Incidence     | Liberia                          | Age-standardized | Cervical cancer | Rate | 30.98942686 |
| Incidence     | Liberia                          | Age-standardized | Uterine cancer  | Rate | 3.707297149 |
| Incidence     | Netherlands                      | Age-standardized | Breast cancer   | Rate | 111.4929873 |
| Incidence     | Netherlands                      | Age-standardized | Cervical cancer | Rate | 6.973286526 |
| Incidence     | Netherlands                      | Age-standardized | Uterine cancer  | Rate | 23.02469632 |
| Incidence     | Netherlands                      | Age-standardized | Ovarian cancer  | Rate | 11.56373552 |
| Incidence     | Seychelles                       | Age-standardized | Breast cancer   | Rate | 55.22482148 |
| Incidence     | Seychelles                       | Age-standardized | Cervical cancer | Rate | 33.51003085 |
| Incidence     | Seychelles                       | Age-standardized | Uterine cancer  | Rate | 10.31886135 |
| DALYs (Disabi | Belize                           | Age-standardized | Breast cancer   | Rate | 356.3365116 |
| DALYs (Disabi | Belize                           | Age-standardized | Cervical cancer | Rate | 573.6980942 |
| DALYs (Disabi | Belize                           | Age-standardized | Uterine cancer  | Rate | 122.7413965 |
| DALYs (Disabi | Belize                           | Age-standardized | Ovarian cancer  | Rate | 83.9781553  |
| DALYs (Disabi | Lao People's Democratic Republic | Age-standardized | Breast cancer   | Rate | 650.1109608 |
| DALYs (Disabi | Lao People's Democratic Republic | Age-standardized | Cervical cancer | Rate | 289.7587327 |
| DALYs (Disabi | Lao People's Democratic Republic | Age-standardized | Uterine cancer  | Rate | 83.49221445 |
| DALYs (Disabi | Mexico                           | Age-standardized | Breast cancer   | Rate | 381.1271245 |
| DALYs (Disabi | Mexico                           | Age-standardized | Cervical cancer | Rate | 282.987736  |
| DALYs (Disabi | Mexico                           | Age-standardized | Uterine cancer  | Rate | 39.40431338 |
| DALYs (Disabi | Bosnia and Herzegovina           | Age-standardized | Breast cancer   | Rate | 577.7508609 |
| DALYs (Disabi | Bosnia and Herzegovina           | Age-standardized | Cervical cancer | Rate | 179.3958491 |
| DALYs (Disabi | Bosnia and Herzegovina           | Age-standardized | Uterine cancer  | Rate | 86.83010712 |
| DALYs (Disabi | Puerto Rico                      | Age-standardized | Uterine cancer  | Rate | 72.51064002 |
| DALYs (Disabi | Puerto Rico                      | Age-standardized | Ovarian cancer  | Rate | 115.6279318 |
| DALYs (Disabi | Kiribati                         | Age-standardized | Cervical cancer | Rate | 2143.060649 |
| DALYs (Disabi | Kiribati                         | Age-standardized | Uterine cancer  | Rate | 134.5182724 |
| DALYs (Disabi | Mexico                           | Age-standardized | Ovarian cancer  | Rate | 153.1582381 |
| DALYs (Disabi | Kiribati                         | Age-standardized | Breast cancer   | Rate | 1041.567613 |
| DALYs (Disabi | Lao People's Democratic Republic | Age-standardized | Ovarian cancer  | Rate | 159.7175071 |
| DALYs (Disabi | Trinidad and Tobago              | Age-standardized | Breast cancer   | Rate | 687.2837808 |
| DALYs (Disabi | Trinidad and Tobago              | Age-standardized | Cervical cancer | Rate | 341.2743647 |
| DALYs (Disabi | Trinidad and Tobago              | Age-standardized | Uterine cancer  | Rate | 151.2645276 |
| DALYs (Disabi | Trinidad and Tobago              | Age-standardized | Ovarian cancer  | Rate | 192.2058995 |
| DALYs (Disabi | Georgia                          | Age-standardized | Breast cancer   | Rate | 866.5904577 |
| DALYs (Disabi | Georgia                          | Age-standardized | Cervical cancer | Rate | 261.6406722 |
| DALYs (Disabi | Georgia                          | Age-standardized | Uterine cancer  | Rate | 169.3087137 |
| DALYs (Disabi | Saudi Arabia                     | Age-standardized | Breast cancer   | Rate | 446.1473168 |
| DALYs (Disabi | Saudi Arabia                     | Age-standardized | Cervical cancer | Rate | 64.91805636 |
| DALYs (Disabi | Saudi Arabia                     | Age-standardized | Uterine cancer  | Rate | 39.81265231 |
| DALYs (Disabi | Cuba                             | Age-standardized | Ovarian cancer  | Rate | 109.1694561 |
| DALYs (Disabi | Bahrain                          | Age-standardized | Ovarian cancer  | Rate | 187.1272878 |
| DALYs (Disabi | Egypt                            | Age-standardized | Breast cancer   | Rate | 436.2262003 |
| DALYs (Disabi | Egypt                            | Age-standardized | Cervical cancer | Rate | 45.12678509 |
| DALYs (Disabi | Egypt                            | Age-standardized | Uterine cancer  | Rate | 40.63419528 |
| DALYs (Disabi | Qatar                            | Age-standardized | Breast cancer   | Rate | 856.375117  |
| DALYs (Disabi | Qatar                            | Age-standardized | Cervical cancer | Rate | 104.1769731 |
| DALYs (Disabi | Qatar                            | Age-standardized | Uterine cancer  | Rate | 50.63986701 |
| DALYs (Disabi | Nicaragua                        | Age-standardized | Cervical cancer | Rate | 465.4197568 |
| DALYs (Disabi | Nicaragua                        | Age-standardized | Uterine cancer  | Rate | 39.57803226 |
| DALYs (Disabi | Nicaragua                        | Age-standardized | Ovarian cancer  | Rate | 101.7927527 |
| DALYs (Disabi | Saint Kitts and Nevis            | Age-standardized | Ovarian cancer  | Rate | 188.1661962 |
| DALYs (Disabi | Azerbaijan                       | Age-standardized | Breast cancer   | Rate | 550.2306066 |
| DALYs (Disabi | Kiribati                         | Age-standardized | Ovarian cancer  | Rate | 78.7263123  |
| DALYs (Disabi | Bulgaria                         | Age-standardized | Breast cancer   | Rate | 698.4902825 |
| DALYs (Disabi | Bulgaria                         | Age-standardized | Cervical cancer | Rate | 293.8873179 |
| DALYs (Disabi | Bulgaria                         | Age-standardized | Uterine cancer  | Rate | 150.3728838 |
| DALYs (Disabi | Bulgaria                         | Age-standardized | Ovarian cancer  | Rate | 230.7887508 |

|                                                 |                  |                 |      |             |
|-------------------------------------------------|------------------|-----------------|------|-------------|
| DALYs (Disabi Cook Islands)                     | Age-standardized | Ovarian cancer  | Rate | 80.43775889 |
| DALYs (Disabi Qatar)                            | Age-standardized | Ovarian cancer  | Rate | 195.6205678 |
| DALYs (Disabi Azerbaijan)                       | Age-standardized | Cervical cancer | Rate | 188.3475445 |
| DALYs (Disabi Azerbaijan)                       | Age-standardized | Uterine cancer  | Rate | 78.96424052 |
| DALYs (Disabi Azerbaijan)                       | Age-standardized | Ovarian cancer  | Rate | 112.726338  |
| DALYs (Disabi Malaysia)                         | Age-standardized | Breast cancer   | Rate | 757.2384691 |
| DALYs (Disabi Malaysia)                         | Age-standardized | Cervical cancer | Rate | 243.9089574 |
| DALYs (Disabi Malaysia)                         | Age-standardized | Uterine cancer  | Rate | 64.17244495 |
| DALYs (Disabi Luxembourg)                       | Age-standardized | Cervical cancer | Rate | 55.33842527 |
| DALYs (Disabi Luxembourg)                       | Age-standardized | Uterine cancer  | Rate | 73.21580458 |
| DALYs (Disabi Slovenia)                         | Age-standardized | Breast cancer   | Rate | 472.5853139 |
| DALYs (Disabi Slovenia)                         | Age-standardized | Cervical cancer | Rate | 87.44922422 |
| DALYs (Disabi Slovenia)                         | Age-standardized | Uterine cancer  | Rate | 70.21139883 |
| DALYs (Disabi Bhutan)                           | Age-standardized | Breast cancer   | Rate | 347.8971104 |
| DALYs (Disabi Bhutan)                           | Age-standardized | Cervical cancer | Rate | 222.6095379 |
| DALYs (Disabi Bhutan)                           | Age-standardized | Uterine cancer  | Rate | 33.32697954 |
| DALYs (Disabi Bhutan)                           | Age-standardized | Ovarian cancer  | Rate | 138.972793  |
| DALYs (Disabi Slovenia)                         | Age-standardized | Ovarian cancer  | Rate | 178.9027159 |
| DALYs (Disabi Luxembourg)                       | Age-standardized | Ovarian cancer  | Rate | 182.5631602 |
| DALYs (Disabi Belgium)                          | Age-standardized | Breast cancer   | Rate | 629.7690375 |
| DALYs (Disabi Belgium)                          | Age-standardized | Cervical cancer | Rate | 78.16205323 |
| DALYs (Disabi Belgium)                          | Age-standardized | Uterine cancer  | Rate | 62.75038111 |
| DALYs (Disabi Mauritius)                        | Age-standardized | Breast cancer   | Rate | 678.214583  |
| DALYs (Disabi Mauritius)                        | Age-standardized | Cervical cancer | Rate | 162.8563261 |
| DALYs (Disabi Mauritius)                        | Age-standardized | Uterine cancer  | Rate | 85.37910151 |
| DALYs (Disabi Maldives)                         | Age-standardized | Breast cancer   | Rate | 373.4176143 |
| DALYs (Disabi Maldives)                         | Age-standardized | Cervical cancer | Rate | 110.4845259 |
| DALYs (Disabi Maldives)                         | Age-standardized | Uterine cancer  | Rate | 29.02217338 |
| DALYs (Disabi Maldives)                         | Age-standardized | Ovarian cancer  | Rate | 156.8319292 |
| DALYs (Disabi Malaysia)                         | Age-standardized | Ovarian cancer  | Rate | 136.7876978 |
| DALYs (Disabi Côte d'Ivoire)                    | Age-standardized | Breast cancer   | Rate | 448.7621575 |
| DALYs (Disabi Mauritius)                        | Age-standardized | Ovarian cancer  | Rate | 160.4691185 |
| DALYs (Disabi Kazakhstan)                       | Age-standardized | Breast cancer   | Rate | 486.4028347 |
| DALYs (Disabi Kazakhstan)                       | Age-standardized | Cervical cancer | Rate | 262.0073562 |
| DALYs (Disabi Kazakhstan)                       | Age-standardized | Uterine cancer  | Rate | 88.59056975 |
| DALYs (Disabi Egypt)                            | Age-standardized | Ovarian cancer  | Rate | 64.7873235  |
| DALYs (Disabi Marshall Islands)                 | Age-standardized | Breast cancer   | Rate | 1202.900492 |
| DALYs (Disabi Marshall Islands)                 | Age-standardized | Cervical cancer | Rate | 696.4388036 |
| DALYs (Disabi Marshall Islands)                 | Age-standardized | Uterine cancer  | Rate | 184.5331898 |
| DALYs (Disabi Equatorial Guinea)                | Age-standardized | Ovarian cancer  | Rate | 108.0064774 |
| DALYs (Disabi Panama)                           | Age-standardized | Ovarian cancer  | Rate | 110.3827335 |
| DALYs (Disabi Bolivia (Plurinational State of)) | Age-standardized | Ovarian cancer  | Rate | 130.1060083 |
| DALYs (Disabi Namibia)                          | Age-standardized | Ovarian cancer  | Rate | 103.11389   |
| DALYs (Disabi Puerto Rico)                      | Age-standardized | Breast cancer   | Rate | 515.6481532 |
| DALYs (Disabi Syrian Arab Republic)             | Age-standardized | Breast cancer   | Rate | 334.0492568 |
| DALYs (Disabi Syrian Arab Republic)             | Age-standardized | Cervical cancer | Rate | 46.56422498 |
| DALYs (Disabi Syrian Arab Republic)             | Age-standardized | Uterine cancer  | Rate | 27.99467394 |
| DALYs (Disabi Croatia)                          | Age-standardized | Breast cancer   | Rate | 521.2985583 |
| DALYs (Disabi Croatia)                          | Age-standardized | Cervical cancer | Rate | 108.5460889 |
| DALYs (Disabi Brunei Darussalam)                | Age-standardized | Breast cancer   | Rate | 737.82324   |
| DALYs (Disabi Brunei Darussalam)                | Age-standardized | Cervical cancer | Rate | 305.1289391 |
| DALYs (Disabi Brunei Darussalam)                | Age-standardized | Uterine cancer  | Rate | 76.35512527 |
| DALYs (Disabi Gabon)                            | Age-standardized | Breast cancer   | Rate | 729.2275913 |
| DALYs (Disabi Gabon)                            | Age-standardized | Cervical cancer | Rate | 500.1592866 |
| DALYs (Disabi Gabon)                            | Age-standardized | Uterine cancer  | Rate | 57.80226157 |
| DALYs (Disabi Gambia)                           | Age-standardized | Breast cancer   | Rate | 354.5370893 |
| DALYs (Disabi Gambia)                           | Age-standardized | Cervical cancer | Rate | 523.791287  |
| DALYs (Disabi Mozambique)                       | Age-standardized | Cervical cancer | Rate | 915.0423578 |

|                                           |                  |                 |      |             |
|-------------------------------------------|------------------|-----------------|------|-------------|
| DALYs (Disabi Mozambique)                 | Age-standardized | Uterine cancer  | Rate | 65.85999529 |
| DALYs (Disabi Croatia)                    | Age-standardized | Ovarian cancer  | Rate | 183.0171421 |
| DALYs (Disabi Luxembourg)                 | Age-standardized | Breast cancer   | Rate | 523.6286572 |
| DALYs (Disabi Saudi Arabia)               | Age-standardized | Ovarian cancer  | Rate | 113.2607251 |
| DALYs (Disabi Marshall Islands)           | Age-standardized | Ovarian cancer  | Rate | 146.3881567 |
| DALYs (Disabi Iran (Islamic Republic of)) | Age-standardized | Breast cancer   | Rate | 368.7090065 |
| DALYs (Disabi Iran (Islamic Republic of)) | Age-standardized | Cervical cancer | Rate | 54.11468571 |
| DALYs (Disabi Iran (Islamic Republic of)) | Age-standardized | Uterine cancer  | Rate | 25.04656341 |
| DALYs (Disabi Belgium)                    | Age-standardized | Ovarian cancer  | Rate | 150.3945749 |
| DALYs (Disabi Gambia)                     | Age-standardized | Uterine cancer  | Rate | 43.9744063  |
| DALYs (Disabi Namibia)                    | Age-standardized | Breast cancer   | Rate | 866.4333931 |
| DALYs (Disabi Namibia)                    | Age-standardized | Cervical cancer | Rate | 486.5302851 |
| DALYs (Disabi Namibia)                    | Age-standardized | Uterine cancer  | Rate | 52.6391603  |
| DALYs (Disabi Georgia)                    | Age-standardized | Ovarian cancer  | Rate | 194.4793235 |
| DALYs (Disabi Malta)                      | Age-standardized | Ovarian cancer  | Rate | 176.0597725 |
| DALYs (Disabi Cuba)                       | Age-standardized | Breast cancer   | Rate | 481.6065185 |
| DALYs (Disabi Cuba)                       | Age-standardized | Cervical cancer | Rate | 242.7844998 |
| DALYs (Disabi Cuba)                       | Age-standardized | Uterine cancer  | Rate | 166.3663592 |
| DALYs (Disabi Senegal)                    | Age-standardized | Breast cancer   | Rate | 602.6338413 |
| DALYs (Disabi Senegal)                    | Age-standardized | Cervical cancer | Rate | 594.1383969 |
| DALYs (Disabi Senegal)                    | Age-standardized | Uterine cancer  | Rate | 56.10756719 |
| DALYs (Disabi Gabon)                      | Age-standardized | Ovarian cancer  | Rate | 134.6247125 |
| DALYs (Disabi India)                      | Age-standardized | Breast cancer   | Rate | 416.3760711 |
| DALYs (Disabi India)                      | Age-standardized | Cervical cancer | Rate | 239.4866232 |
| DALYs (Disabi India)                      | Age-standardized | Uterine cancer  | Rate | 29.87006564 |
| DALYs (Disabi Mozambique)                 | Age-standardized | Breast cancer   | Rate | 587.3865996 |
| DALYs (Disabi Cyprus)                     | Age-standardized | Breast cancer   | Rate | 592.2251943 |
| DALYs (Disabi Brunei Darussalam)          | Age-standardized | Ovarian cancer  | Rate | 281.9858508 |
| DALYs (Disabi Mozambique)                 | Age-standardized | Ovarian cancer  | Rate | 137.3877067 |
| DALYs (Disabi Iran (Islamic Republic of)) | Age-standardized | Ovarian cancer  | Rate | 85.35071236 |
| DALYs (Disabi Croatia)                    | Age-standardized | Uterine cancer  | Rate | 83.02398833 |
| DALYs (Disabi Cyprus)                     | Age-standardized | Cervical cancer | Rate | 72.27887527 |
| DALYs (Disabi Cyprus)                     | Age-standardized | Uterine cancer  | Rate | 69.35472221 |
| DALYs (Disabi Japan)                      | Age-standardized | Breast cancer   | Rate | 338.0881443 |
| DALYs (Disabi Japan)                      | Age-standardized | Cervical cancer | Rate | 90.9878711  |
| DALYs (Disabi Japan)                      | Age-standardized | Uterine cancer  | Rate | 50.94707963 |
| DALYs (Disabi Senegal)                    | Age-standardized | Ovarian cancer  | Rate | 92.58268401 |
| DALYs (Disabi Chile)                      | Age-standardized | Breast cancer   | Rate | 377.2036755 |
| DALYs (Disabi Estonia)                    | Age-standardized | Breast cancer   | Rate | 500.6137786 |
| DALYs (Disabi Estonia)                    | Age-standardized | Cervical cancer | Rate | 160.8160545 |
| DALYs (Disabi Estonia)                    | Age-standardized | Uterine cancer  | Rate | 79.47212763 |
| DALYs (Disabi Nepal)                      | Age-standardized | Breast cancer   | Rate | 549.9366262 |
| DALYs (Disabi Nepal)                      | Age-standardized | Cervical cancer | Rate | 259.0567389 |
| DALYs (Disabi Nepal)                      | Age-standardized | Uterine cancer  | Rate | 31.43463236 |
| DALYs (Disabi Cote d'Ivoire)              | Age-standardized | Ovarian cancer  | Rate | 91.0950654  |
| DALYs (Disabi Nicaragua)                  | Age-standardized | Breast cancer   | Rate | 335.654079  |
| DALYs (Disabi Kyrgyzstan)                 | Age-standardized | Breast cancer   | Rate | 317.4315242 |
| DALYs (Disabi Kyrgyzstan)                 | Age-standardized | Cervical cancer | Rate | 291.7775604 |
| DALYs (Disabi Kyrgyzstan)                 | Age-standardized | Uterine cancer  | Rate | 76.37569284 |
| DALYs (Disabi Kyrgyzstan)                 | Age-standardized | Ovarian cancer  | Rate | 143.3431947 |
| DALYs (Disabi Chile)                      | Age-standardized | Cervical cancer | Rate | 212.5792848 |
| DALYs (Disabi Chile)                      | Age-standardized | Uterine cancer  | Rate | 45.50324831 |
| DALYs (Disabi Chile)                      | Age-standardized | Ovarian cancer  | Rate | 127.454412  |
| DALYs (Disabi Cyprus)                     | Age-standardized | Ovarian cancer  | Rate | 155.7260569 |
| DALYs (Disabi Papua New Guinea)           | Age-standardized | Breast cancer   | Rate | 1467.979286 |
| DALYs (Disabi Papua New Guinea)           | Age-standardized | Cervical cancer | Rate | 451.6271592 |
| DALYs (Disabi Papua New Guinea)           | Age-standardized | Uterine cancer  | Rate | 99.18453925 |
| DALYs (Disabi Sierra Leone)               | Age-standardized | Breast cancer   | Rate | 512.5828675 |

|                                         |                  |                 |      |             |
|-----------------------------------------|------------------|-----------------|------|-------------|
| DALYs (Disabi Dominica)                 | Age-standardized | Breast cancer   | Rate | 862.5082116 |
| DALYs (Disabi Malta)                    | Age-standardized | Breast cancer   | Rate | 589.2954841 |
| DALYs (Disabi Malta)                    | Age-standardized | Cervical cancer | Rate | 50.94210092 |
| DALYs (Disabi Malta)                    | Age-standardized | Uterine cancer  | Rate | 63.34244228 |
| DALYs (Disabi Myanmar)                  | Age-standardized | Ovarian cancer  | Rate | 155.7055008 |
| DALYs (Disabi Saint Kitts and Nevis)    | Age-standardized | Breast cancer   | Rate | 802.7833845 |
| DALYs (Disabi Saint Kitts and Nevis)    | Age-standardized | Cervical cancer | Rate | 415.7296659 |
| DALYs (Disabi Saint Kitts and Nevis)    | Age-standardized | Uterine cancer  | Rate | 159.3755207 |
| DALYs (Disabi Syrian Arab Republic)     | Age-standardized | Ovarian cancer  | Rate | 66.45536197 |
| DALYs (Disabi Czechia)                  | Age-standardized | Ovarian cancer  | Rate | 195.2104742 |
| DALYs (Disabi India)                    | Age-standardized | Ovarian cancer  | Rate | 104.7925819 |
| DALYs (Disabi Myanmar)                  | Age-standardized | Breast cancer   | Rate | 505.6948018 |
| DALYs (Disabi Myanmar)                  | Age-standardized | Cervical cancer | Rate | 247.2787548 |
| DALYs (Disabi Myanmar)                  | Age-standardized | Uterine cancer  | Rate | 71.83633913 |
| DALYs (Disabi Eswatini)                 | Age-standardized | Breast cancer   | Rate | 614.4410054 |
| DALYs (Disabi Eswatini)                 | Age-standardized | Cervical cancer | Rate | 794.7402591 |
| DALYs (Disabi Eswatini)                 | Age-standardized | Uterine cancer  | Rate | 74.2931416  |
| DALYs (Disabi Kazakhstan)               | Age-standardized | Ovarian cancer  | Rate | 194.8750916 |
| DALYs (Disabi Belarus)                  | Age-standardized | Ovarian cancer  | Rate | 171.4523742 |
| DALYs (Disabi Sierra Leone)             | Age-standardized | Cervical cancer | Rate | 691.2758388 |
| DALYs (Disabi Sierra Leone)             | Age-standardized | Uterine cancer  | Rate | 55.38264322 |
| DALYs (Disabi Japan)                    | Age-standardized | Ovarian cancer  | Rate | 109.8825929 |
| DALYs (Disabi Ghana)                    | Age-standardized | Ovarian cancer  | Rate | 109.4151743 |
| DALYs (Disabi Denmark)                  | Age-standardized | Breast cancer   | Rate | 591.186807  |
| DALYs (Disabi Denmark)                  | Age-standardized | Cervical cancer | Rate | 94.17169468 |
| DALYs (Disabi Denmark)                  | Age-standardized | Uterine cancer  | Rate | 62.49900589 |
| DALYs (Disabi Rwanda)                   | Age-standardized | Breast cancer   | Rate | 547.9154177 |
| DALYs (Disabi Rwanda)                   | Age-standardized | Cervical cancer | Rate | 643.9123081 |
| DALYs (Disabi Rwanda)                   | Age-standardized | Uterine cancer  | Rate | 58.76386788 |
| DALYs (Disabi Netherlands)              | Age-standardized | Breast cancer   | Rate | 669.6901376 |
| DALYs (Disabi Netherlands)              | Age-standardized | Cervical cancer | Rate | 65.3424395  |
| DALYs (Disabi Netherlands)              | Age-standardized | Uterine cancer  | Rate | 71.55486642 |
| DALYs (Disabi Tunisia)                  | Age-standardized | Breast cancer   | Rate | 483.5488237 |
| DALYs (Disabi Tunisia)                  | Age-standardized | Cervical cancer | Rate | 75.11852824 |
| DALYs (Disabi Tunisia)                  | Age-standardized | Uterine cancer  | Rate | 27.26583362 |
| DALYs (Disabi Tunisia)                  | Age-standardized | Ovarian cancer  | Rate | 96.93969076 |
| DALYs (Disabi Belarus)                  | Age-standardized | Breast cancer   | Rate | 433.5164617 |
| DALYs (Disabi Belarus)                  | Age-standardized | Cervical cancer | Rate | 194.8290028 |
| DALYs (Disabi Belarus)                  | Age-standardized | Uterine cancer  | Rate | 60.75968329 |
| DALYs (Disabi Burundi)                  | Age-standardized | Ovarian cancer  | Rate | 105.8199858 |
| DALYs (Disabi Nepal)                    | Age-standardized | Ovarian cancer  | Rate | 126.0004094 |
| DALYs (Disabi Guinea)                   | Age-standardized | Ovarian cancer  | Rate | 120.7305592 |
| DALYs (Disabi Finland)                  | Age-standardized | Ovarian cancer  | Rate | 162.9549044 |
| DALYs (Disabi France)                   | Age-standardized | Breast cancer   | Rate | 566.323883  |
| DALYs (Disabi France)                   | Age-standardized | Cervical cancer | Rate | 82.26507035 |
| DALYs (Disabi France)                   | Age-standardized | Uterine cancer  | Rate | 62.75129286 |
| DALYs (Disabi Guam)                     | Age-standardized | Breast cancer   | Rate | 514.2255263 |
| DALYs (Disabi Guam)                     | Age-standardized | Cervical cancer | Rate | 187.8013235 |
| DALYs (Disabi Guam)                     | Age-standardized | Uterine cancer  | Rate | 85.3832458  |
| DALYs (Disabi Finland)                  | Age-standardized | Breast cancer   | Rate | 464.9899814 |
| DALYs (Disabi Finland)                  | Age-standardized | Cervical cancer | Rate | 47.49138549 |
| DALYs (Disabi Finland)                  | Age-standardized | Uterine cancer  | Rate | 68.58368403 |
| DALYs (Disabi United States of America) | Age-standardized | Breast cancer   | Rate | 536.4357377 |
| DALYs (Disabi Seychelles)               | Age-standardized | Uterine cancer  | Rate | 78.69937313 |
| DALYs (Disabi Seychelles)               | Age-standardized | Ovarian cancer  | Rate | 263.4475596 |
| DALYs (Disabi Pakistan)                 | Age-standardized | Breast cancer   | Rate | 1570.061314 |
| DALYs (Disabi Pakistan)                 | Age-standardized | Cervical cancer | Rate | 149.9342262 |
| DALYs (Disabi Pakistan)                 | Age-standardized | Uterine cancer  | Rate | 120.2300266 |



|                                                   |                  |                 |      |             |
|---------------------------------------------------|------------------|-----------------|------|-------------|
| DALYs (Disabi South Africa)                       | Age-standardized | Ovarian cancer  | Rate | 124.6442261 |
| DALYs (Disabi Latvia)                             | Age-standardized | Ovarian cancer  | Rate | 256.6087689 |
| DALYs (Disabi Hungary)                            | Age-standardized | Breast cancer   | Rate | 555.7899381 |
| DALYs (Disabi Hungary)                            | Age-standardized | Cervical cancer | Rate | 170.0566444 |
| DALYs (Disabi Hungary)                            | Age-standardized | Uterine cancer  | Rate | 80.39001194 |
| DALYs (Disabi Hungary)                            | Age-standardized | Ovarian cancer  | Rate | 200.6901505 |
| DALYs (Disabi Jordan)                             | Age-standardized | Ovarian cancer  | Rate | 98.27271564 |
| DALYs (Disabi Guinea)                             | Age-standardized | Breast cancer   | Rate | 551.9964421 |
| DALYs (Disabi Guinea)                             | Age-standardized | Cervical cancer | Rate | 1143.795742 |
| DALYs (Disabi Guinea)                             | Age-standardized | Uterine cancer  | Rate | 61.02380304 |
| DALYs (Disabi Zimbabwe)                           | Age-standardized | Breast cancer   | Rate | 782.3117509 |
| DALYs (Disabi Zimbabwe)                           | Age-standardized | Cervical cancer | Rate | 957.2227383 |
| DALYs (Disabi Zimbabwe)                           | Age-standardized | Uterine cancer  | Rate | 133.8173758 |
| DALYs (Disabi Burundi)                            | Age-standardized | Breast cancer   | Rate | 465.6136695 |
| DALYs (Disabi Burundi)                            | Age-standardized | Cervical cancer | Rate | 818.3689554 |
| DALYs (Disabi Burundi)                            | Age-standardized | Uterine cancer  | Rate | 58.76047314 |
| DALYs (Disabi Micronesia (Federated States of))   | Age-standardized | Breast cancer   | Rate | 1238.217131 |
| DALYs (Disabi Micronesia (Federated States of))   | Age-standardized | Cervical cancer | Rate | 622.057796  |
| DALYs (Disabi Micronesia (Federated States of))   | Age-standardized | Uterine cancer  | Rate | 191.7551879 |
| DALYs (Disabi Greece)                             | Age-standardized | Breast cancer   | Rate | 582.8997621 |
| DALYs (Disabi Greece)                             | Age-standardized | Cervical cancer | Rate | 86.06407751 |
| DALYs (Disabi Greece)                             | Age-standardized | Uterine cancer  | Rate | 70.45889055 |
| DALYs (Disabi Uruguay)                            | Age-standardized | Breast cancer   | Rate | 810.4926712 |
| DALYs (Disabi Monaco)                             | Age-standardized | Breast cancer   | Rate | 925.2069647 |
| DALYs (Disabi Monaco)                             | Age-standardized | Cervical cancer | Rate | 80.38804706 |
| DALYs (Disabi Monaco)                             | Age-standardized | Uterine cancer  | Rate | 31.60109075 |
| DALYs (Disabi Dominican Republic)                 | Age-standardized | Breast cancer   | Rate | 481.114551  |
| DALYs (Disabi Venezuela (Bolivarian Republic of)) | Age-standardized | Ovarian cancer  | Rate | 133.4951147 |
| DALYs (Disabi Germany)                            | Age-standardized | Breast cancer   | Rate | 574.1360175 |
| DALYs (Disabi Germany)                            | Age-standardized | Cervical cancer | Rate | 86.55695989 |
| DALYs (Disabi Germany)                            | Age-standardized | Uterine cancer  | Rate | 53.73774322 |
| DALYs (Disabi Norway)                             | Age-standardized | Breast cancer   | Rate | 423.1928387 |
| DALYs (Disabi Norway)                             | Age-standardized | Cervical cancer | Rate | 80.42818281 |
| DALYs (Disabi Spain)                              | Age-standardized | Cervical cancer | Rate | 71.20383263 |
| DALYs (Disabi Spain)                              | Age-standardized | Uterine cancer  | Rate | 69.1028746  |
| DALYs (Disabi Spain)                              | Age-standardized | Ovarian cancer  | Rate | 125.1416821 |
| DALYs (Disabi Bolivia (Plurinational State of))   | Age-standardized | Breast cancer   | Rate | 536.085377  |
| DALYs (Disabi Bolivia (Plurinational State of))   | Age-standardized | Cervical cancer | Rate | 682.1334193 |
| DALYs (Disabi Bolivia (Plurinational State of))   | Age-standardized | Uterine cancer  | Rate | 126.6426057 |
| DALYs (Disabi Panama)                             | Age-standardized | Breast cancer   | Rate | 400.8867626 |
| DALYs (Disabi Panama)                             | Age-standardized | Cervical cancer | Rate | 321.0390061 |
| DALYs (Disabi Panama)                             | Age-standardized | Uterine cancer  | Rate | 65.68209731 |
| DALYs (Disabi Iceland)                            | Age-standardized | Breast cancer   | Rate | 414.4150214 |
| DALYs (Disabi Iceland)                            | Age-standardized | Cervical cancer | Rate | 54.9269956  |
| DALYs (Disabi Iceland)                            | Age-standardized | Uterine cancer  | Rate | 39.98362102 |
| DALYs (Disabi Guinea-Bissau)                      | Age-standardized | Breast cancer   | Rate | 665.6509697 |
| DALYs (Disabi Guinea-Bissau)                      | Age-standardized | Cervical cancer | Rate | 937.6330135 |
| DALYs (Disabi Guinea-Bissau)                      | Age-standardized | Uterine cancer  | Rate | 69.78111533 |
| DALYs (Disabi Cook Islands)                       | Age-standardized | Breast cancer   | Rate | 1034.306039 |
| DALYs (Disabi Cook Islands)                       | Age-standardized | Cervical cancer | Rate | 111.0896105 |
| DALYs (Disabi Cook Islands)                       | Age-standardized | Uterine cancer  | Rate | 49.52862942 |
| DALYs (Disabi Dominica)                           | Age-standardized | Cervical cancer | Rate | 535.7157683 |
| DALYs (Disabi Dominica)                           | Age-standardized | Uterine cancer  | Rate | 113.3481636 |
| DALYs (Disabi Dominica)                           | Age-standardized | Ovarian cancer  | Rate | 94.63742494 |
| DALYs (Disabi Papua New Guinea)                   | Age-standardized | Ovarian cancer  | Rate | 77.01516115 |
| DALYs (Disabi South Africa)                       | Age-standardized | Breast cancer   | Rate | 529.9076776 |
| DALYs (Disabi South Africa)                       | Age-standardized | Cervical cancer | Rate | 500.4380126 |
| DALYs (Disabi South Africa)                       | Age-standardized | Uterine cancer  | Rate | 49.59939672 |

|                                                |                  |                 |      |             |
|------------------------------------------------|------------------|-----------------|------|-------------|
| DALYs (Disabi Czechia                          | Age-standardized | Breast cancer   | Rate | 428.2691402 |
| DALYs (Disabi Czechia                          | Age-standardized | Cervical cancer | Rate | 132.8093833 |
| DALYs (Disabi Czechia                          | Age-standardized | Uterine cancer  | Rate | 88.39183839 |
| DALYs (Disabi Ghana                            | Age-standardized | Breast cancer   | Rate | 863.4649555 |
| DALYs (Disabi Ghana                            | Age-standardized | Cervical cancer | Rate | 516.8483283 |
| DALYs (Disabi Ghana                            | Age-standardized | Uterine cancer  | Rate | 66.35460828 |
| DALYs (Disabi Rwanda                           | Age-standardized | Ovarian cancer  | Rate | 175.0693408 |
| DALYs (Disabi North Macedonia                  | Age-standardized | Ovarian cancer  | Rate | 198.0535995 |
| DALYs (Disabi Uruguay                          | Age-standardized | Ovarian cancer  | Rate | 175.074666  |
| DALYs (Disabi Samoa                            | Age-standardized | Breast cancer   | Rate | 744.3422117 |
| DALYs (Disabi Samoa                            | Age-standardized | Cervical cancer | Rate | 409.1436161 |
| DALYs (Disabi Samoa                            | Age-standardized | Uterine cancer  | Rate | 116.0584687 |
| DALYs (Disabi Republic of Korea                | Age-standardized | Ovarian cancer  | Rate | 81.44059955 |
| DALYs (Disabi Iceland                          | Age-standardized | Ovarian cancer  | Rate | 138.3005098 |
| DALYs (Disabi Spain                            | Age-standardized | Breast cancer   | Rate | 443.7930454 |
| DALYs (Disabi Latvia                           | Age-standardized | Breast cancer   | Rate | 540.2903537 |
| DALYs (Disabi Latvia                           | Age-standardized | Cervical cancer | Rate | 134.7033283 |
| DALYs (Disabi Latvia                           | Age-standardized | Uterine cancer  | Rate | 115.3889647 |
| DALYs (Disabi China                            | Age-standardized | Breast cancer   | Rate | 277.9804449 |
| DALYs (Disabi China                            | Age-standardized | Cervical cancer | Rate | 157.5044883 |
| DALYs (Disabi China                            | Age-standardized | Uterine cancer  | Rate | 34.92583289 |
| DALYs (Disabi Iraq                             | Age-standardized | Breast cancer   | Rate | 714.8507201 |
| DALYs (Disabi Iraq                             | Age-standardized | Cervical cancer | Rate | 70.19509911 |
| DALYs (Disabi Iraq                             | Age-standardized | Uterine cancer  | Rate | 53.33056734 |
| DALYs (Disabi Iraq                             | Age-standardized | Ovarian cancer  | Rate | 115.7588719 |
| DALYs (Disabi Comoros                          | Age-standardized | Breast cancer   | Rate | 554.5232651 |
| DALYs (Disabi Comoros                          | Age-standardized | Cervical cancer | Rate | 707.0151604 |
| DALYs (Disabi Comoros                          | Age-standardized | Uterine cancer  | Rate | 68.37447684 |
| DALYs (Disabi Pakistan                         | Age-standardized | Ovarian cancer  | Rate | 348.3691668 |
| DALYs (Disabi Greenland                        | Age-standardized | Breast cancer   | Rate | 554.3174226 |
| DALYs (Disabi Greenland                        | Age-standardized | Cervical cancer | Rate | 298.2062672 |
| DALYs (Disabi Greenland                        | Age-standardized | Uterine cancer  | Rate | 30.79857751 |
| DALYs (Disabi Ecuador                          | Age-standardized | Breast cancer   | Rate | 380.0577079 |
| DALYs (Disabi Ecuador                          | Age-standardized | Cervical cancer | Rate | 383.7860955 |
| DALYs (Disabi Ecuador                          | Age-standardized | Uterine cancer  | Rate | 93.37282061 |
| DALYs (Disabi Gambia                           | Age-standardized | Ovarian cancer  | Rate | 97.70116493 |
| DALYs (Disabi Somalia                          | Age-standardized | Breast cancer   | Rate | 375.0737604 |
| DALYs (Disabi Somalia                          | Age-standardized | Cervical cancer | Rate | 1013.759927 |
| DALYs (Disabi Somalia                          | Age-standardized | Uterine cancer  | Rate | 62.61224499 |
| DALYs (Disabi Republic of Korea                | Age-standardized | Breast cancer   | Rate | 281.1901529 |
| DALYs (Disabi Republic of Korea                | Age-standardized | Cervical cancer | Rate | 77.89686554 |
| DALYs (Disabi Republic of Korea                | Age-standardized | Uterine cancer  | Rate | 21.63467718 |
| DALYs (Disabi Haiti                            | Age-standardized | Breast cancer   | Rate | 884.6278079 |
| DALYs (Disabi Haiti                            | Age-standardized | Cervical cancer | Rate | 913.0645778 |
| DALYs (Disabi Haiti                            | Age-standardized | Uterine cancer  | Rate | 153.4824403 |
| DALYs (Disabi Singapore                        | Age-standardized | Breast cancer   | Rate | 386.853509  |
| DALYs (Disabi Singapore                        | Age-standardized | Cervical cancer | Rate | 71.94865183 |
| DALYs (Disabi Micronesia (Federated States of) | Age-standardized | Ovarian cancer  | Rate | 164.7324485 |
| DALYs (Disabi Mongolia                         | Age-standardized | Ovarian cancer  | Rate | 130.0998752 |
| DALYs (Disabi Denmark                          | Age-standardized | Ovarian cancer  | Rate | 195.2441417 |
| DALYs (Disabi Australia                        | Age-standardized | Breast cancer   | Rate | 492.1068482 |
| DALYs (Disabi Australia                        | Age-standardized | Cervical cancer | Rate | 64.4122478  |
| DALYs (Disabi Australia                        | Age-standardized | Uterine cancer  | Rate | 52.57159757 |
| DALYs (Disabi Estonia                          | Age-standardized | Ovarian cancer  | Rate | 191.3774309 |
| DALYs (Disabi Djibouti                         | Age-standardized | Ovarian cancer  | Rate | 166.0124987 |
| DALYs (Disabi Norway                           | Age-standardized | Uterine cancer  | Rate | 64.06525987 |
| DALYs (Disabi Lithuania                        | Age-standardized | Breast cancer   | Rate | 497.666308  |
| DALYs (Disabi Lithuania                        | Age-standardized | Cervical cancer | Rate | 166.855191  |

|                                                   |                  |                 |      |             |
|---------------------------------------------------|------------------|-----------------|------|-------------|
| DALYs (Disabi Lithuania)                          | Age-standardized | Uterine cancer  | Rate | 102.4291662 |
| DALYs (Disabi Lithuania)                          | Age-standardized | Ovarian cancer  | Rate | 255.9062864 |
| DALYs (Disabi Turkey)                             | Age-standardized | Ovarian cancer  | Rate | 119.5854243 |
| DALYs (Disabi Portugal)                           | Age-standardized | Breast cancer   | Rate | 482.3434435 |
| DALYs (Disabi Portugal)                           | Age-standardized | Cervical cancer | Rate | 96.3238331  |
| DALYs (Disabi Portugal)                           | Age-standardized | Uterine cancer  | Rate | 67.28968017 |
| DALYs (Disabi Comoros)                            | Age-standardized | Ovarian cancer  | Rate | 185.0736378 |
| DALYs (Disabi Canada)                             | Age-standardized | Breast cancer   | Rate | 511.5405689 |
| DALYs (Disabi Canada)                             | Age-standardized | Cervical cancer | Rate | 77.30536814 |
| DALYs (Disabi Canada)                             | Age-standardized | Uterine cancer  | Rate | 66.68150623 |
| DALYs (Disabi Eswatini)                           | Age-standardized | Ovarian cancer  | Rate | 172.0833179 |
| DALYs (Disabi Benin)                              | Age-standardized | Breast cancer   | Rate | 444.8186613 |
| DALYs (Disabi Benin)                              | Age-standardized | Cervical cancer | Rate | 608.3578415 |
| DALYs (Disabi Benin)                              | Age-standardized | Uterine cancer  | Rate | 53.6443283  |
| DALYs (Disabi Philippines)                        | Age-standardized | Breast cancer   | Rate | 711.6866204 |
| DALYs (Disabi Philippines)                        | Age-standardized | Cervical cancer | Rate | 226.7533562 |
| DALYs (Disabi Philippines)                        | Age-standardized | Uterine cancer  | Rate | 73.95017978 |
| DALYs (Disabi Philippines)                        | Age-standardized | Ovarian cancer  | Rate | 183.6741435 |
| DALYs (Disabi Djibouti)                           | Age-standardized | Breast cancer   | Rate | 545.4486907 |
| DALYs (Disabi Djibouti)                           | Age-standardized | Cervical cancer | Rate | 675.4636289 |
| DALYs (Disabi Djibouti)                           | Age-standardized | Uterine cancer  | Rate | 69.68486925 |
| DALYs (Disabi Nauru)                              | Age-standardized | Breast cancer   | Rate | 1235.040626 |
| DALYs (Disabi Nauru)                              | Age-standardized | Cervical cancer | Rate | 612.1837822 |
| DALYs (Disabi Nauru)                              | Age-standardized | Uterine cancer  | Rate | 191.0643643 |
| DALYs (Disabi Netherlands)                        | Age-standardized | Ovarian cancer  | Rate | 173.484706  |
| DALYs (Disabi Canada)                             | Age-standardized | Ovarian cancer  | Rate | 144.4926302 |
| DALYs (Disabi United Republic of Tanzania)        | Age-standardized | Breast cancer   | Rate | 471.8343235 |
| DALYs (Disabi United Republic of Tanzania)        | Age-standardized | Cervical cancer | Rate | 702.4210324 |
| DALYs (Disabi United Republic of Tanzania)        | Age-standardized | Uterine cancer  | Rate | 66.37565168 |
| DALYs (Disabi China)                              | Age-standardized | Ovarian cancer  | Rate | 80.52279061 |
| DALYs (Disabi Dominican Republic)                 | Age-standardized | Cervical cancer | Rate | 405.5114063 |
| DALYs (Disabi Dominican Republic)                 | Age-standardized | Uterine cancer  | Rate | 143.3240647 |
| DALYs (Disabi Venezuela (Bolivarian Republic of)) | Age-standardized | Breast cancer   | Rate | 537.7115436 |
| DALYs (Disabi Venezuela (Bolivarian Republic of)) | Age-standardized | Cervical cancer | Rate | 505.7049182 |
| DALYs (Disabi Venezuela (Bolivarian Republic of)) | Age-standardized | Uterine cancer  | Rate | 67.84077914 |
| DALYs (Disabi France)                             | Age-standardized | Ovarian cancer  | Rate | 146.6785442 |
| DALYs (Disabi Uruguay)                            | Age-standardized | Cervical cancer | Rate | 275.046357  |
| DALYs (Disabi Uruguay)                            | Age-standardized | Uterine cancer  | Rate | 55.2300441  |
| DALYs (Disabi Norway)                             | Age-standardized | Ovarian cancer  | Rate | 194.3344868 |
| DALYs (Disabi Singapore)                          | Age-standardized | Uterine cancer  | Rate | 50.64417041 |
| DALYs (Disabi Singapore)                          | Age-standardized | Ovarian cancer  | Rate | 113.0879843 |
| DALYs (Disabi Mali)                               | Age-standardized | Breast cancer   | Rate | 503.3037913 |
| DALYs (Disabi Mali)                               | Age-standardized | Cervical cancer | Rate | 580.5221665 |
| DALYs (Disabi Mali)                               | Age-standardized | Uterine cancer  | Rate | 41.86834797 |
| DALYs (Disabi Eritrea)                            | Age-standardized | Cervical cancer | Rate | 973.5832728 |
| DALYs (Disabi Eritrea)                            | Age-standardized | Uterine cancer  | Rate | 81.72071059 |
| DALYs (Disabi Eritrea)                            | Age-standardized | Ovarian cancer  | Rate | 148.9855747 |
| DALYs (Disabi Republic of Moldova)                | Age-standardized | Ovarian cancer  | Rate | 139.4160123 |
| DALYs (Disabi San Marino)                         | Age-standardized | Ovarian cancer  | Rate | 112.8578487 |
| DALYs (Disabi Sierra Leone)                       | Age-standardized | Ovarian cancer  | Rate | 82.13772749 |
| DALYs (Disabi Seychelles)                         | Age-standardized | Breast cancer   | Rate | 761.5601796 |
| DALYs (Disabi Seychelles)                         | Age-standardized | Cervical cancer | Rate | 468.4890368 |
| DALYs (Disabi Togo)                               | Age-standardized | Breast cancer   | Rate | 498.6511106 |
| DALYs (Disabi Togo)                               | Age-standardized | Cervical cancer | Rate | 609.52696   |
| DALYs (Disabi Togo)                               | Age-standardized | Uterine cancer  | Rate | 52.05176214 |
| DALYs (Disabi Liberia)                            | Age-standardized | Breast cancer   | Rate | 528.2260412 |
| DALYs (Disabi Liberia)                            | Age-standardized | Cervical cancer | Rate | 620.589718  |
| DALYs (Disabi Liberia)                            | Age-standardized | Uterine cancer  | Rate | 55.55387848 |

|                                         |                  |                 |      |             |
|-----------------------------------------|------------------|-----------------|------|-------------|
| DALYs (Disabi Somalia)                  | Age-standardized | Ovarian cancer  | Rate | 95.85402876 |
| DALYs (Disabi Greenland)                | Age-standardized | Ovarian cancer  | Rate | 258.8547673 |
| DALYs (Disabi Germany)                  | Age-standardized | Ovarian cancer  | Rate | 156.6907417 |
| DALYs (Disabi Grenada)                  | Age-standardized | Breast cancer   | Rate | 857.9992658 |
| DALYs (Disabi Grenada)                  | Age-standardized | Cervical cancer | Rate | 525.9146811 |
| DALYs (Disabi Grenada)                  | Age-standardized | Uterine cancer  | Rate | 283.0854762 |
| DALYs (Disabi San Marino)               | Age-standardized | Breast cancer   | Rate | 556.5949723 |
| DALYs (Disabi San Marino)               | Age-standardized | Cervical cancer | Rate | 68.39912091 |
| DALYs (Disabi San Marino)               | Age-standardized | Uterine cancer  | Rate | 19.99959201 |
| DALYs (Disabi Portugal)                 | Age-standardized | Ovarian cancer  | Rate | 102.2414431 |
| DALYs (Disabi Dominican Republic)       | Age-standardized | Ovarian cancer  | Rate | 50.30137088 |
| DALYs (Disabi Peru)                     | Age-standardized | Breast cancer   | Rate | 318.2720845 |
| DALYs (Disabi Peru)                     | Age-standardized | Cervical cancer | Rate | 366.0306927 |
| DALYs (Disabi Peru)                     | Age-standardized | Uterine cancer  | Rate | 70.28012911 |
| DALYs (Disabi Solomon Islands)          | Age-standardized | Breast cancer   | Rate | 2635.742894 |
| DALYs (Disabi Solomon Islands)          | Age-standardized | Cervical cancer | Rate | 1018.693697 |
| DALYs (Disabi Solomon Islands)          | Age-standardized | Uterine cancer  | Rate | 221.030714  |
| DALYs (Disabi Togo)                     | Age-standardized | Ovarian cancer  | Rate | 86.28510378 |
| DALYs (Disabi Uganda)                   | Age-standardized | Breast cancer   | Rate | 656.1138659 |
| DALYs (Disabi Uganda)                   | Age-standardized | Cervical cancer | Rate | 756.6595616 |
| DALYs (Disabi Uganda)                   | Age-standardized | Uterine cancer  | Rate | 94.41111961 |
| DALYs (Disabi Uganda)                   | Age-standardized | Ovarian cancer  | Rate | 195.1631076 |
| DALYs (Disabi Antigua and Barbuda)      | Age-standardized | Cervical cancer | Rate | 308.7189016 |
| DALYs (Disabi Antigua and Barbuda)      | Age-standardized | Uterine cancer  | Rate | 130.6183923 |
| DALYs (Disabi Antigua and Barbuda)      | Age-standardized | Ovarian cancer  | Rate | 176.2306482 |
| DALYs (Disabi Antigua and Barbuda)      | Age-standardized | Breast cancer   | Rate | 809.1877906 |
| DALYs (Disabi New Zealand)              | Age-standardized | Ovarian cancer  | Rate | 147.9536167 |
| DALYs (Disabi Switzerland)              | Age-standardized | Breast cancer   | Rate | 481.326635  |
| DALYs (Disabi Switzerland)              | Age-standardized | Cervical cancer | Rate | 58.09268703 |
| DALYs (Disabi Switzerland)              | Age-standardized | Uterine cancer  | Rate | 42.92681383 |
| DALYs (Disabi Guinea-Bissau)            | Age-standardized | Ovarian cancer  | Rate | 97.81244756 |
| DALYs (Disabi New Zealand)              | Age-standardized | Breast cancer   | Rate | 598.9842122 |
| DALYs (Disabi New Zealand)              | Age-standardized | Cervical cancer | Rate | 71.07539181 |
| DALYs (Disabi New Zealand)              | Age-standardized | Uterine cancer  | Rate | 75.6585138  |
| DALYs (Disabi Benin)                    | Age-standardized | Ovarian cancer  | Rate | 76.20774365 |
| DALYs (Disabi Samoa)                    | Age-standardized | Ovarian cancer  | Rate | 245.9736421 |
| DALYs (Disabi Sweden)                   | Age-standardized | Breast cancer   | Rate | 489.4760082 |
| DALYs (Disabi Sweden)                   | Age-standardized | Cervical cancer | Rate | 75.63562333 |
| DALYs (Disabi Monaco)                   | Age-standardized | Ovarian cancer  | Rate | 342.074609  |
| DALYs (Disabi Sudan)                    | Age-standardized | Cervical cancer | Rate | 93.65950688 |
| DALYs (Disabi Sudan)                    | Age-standardized | Uterine cancer  | Rate | 25.31519459 |
| DALYs (Disabi Mauritania)               | Age-standardized | Breast cancer   | Rate | 488.2337713 |
| DALYs (Disabi Mauritania)               | Age-standardized | Cervical cancer | Rate | 523.8332153 |
| DALYs (Disabi Mauritania)               | Age-standardized | Uterine cancer  | Rate | 59.95154639 |
| DALYs (Disabi Solomon Islands)          | Age-standardized | Ovarian cancer  | Rate | 118.6981096 |
| DALYs (Disabi Sweden)                   | Age-standardized | Uterine cancer  | Rate | 56.55482894 |
| DALYs (Disabi Zimbabwe)                 | Age-standardized | Ovarian cancer  | Rate | 210.8445587 |
| DALYs (Disabi Ecuador)                  | Age-standardized | Ovarian cancer  | Rate | 136.9769584 |
| DALYs (Disabi Cambodia)                 | Age-standardized | Breast cancer   | Rate | 442.6861638 |
| DALYs (Disabi Cambodia)                 | Age-standardized | Cervical cancer | Rate | 305.9785677 |
| DALYs (Disabi Cambodia)                 | Age-standardized | Uterine cancer  | Rate | 82.80500145 |
| DALYs (Disabi United States of America) | Age-standardized | Cervical cancer | Rate | 98.77152306 |
| DALYs (Disabi United States of America) | Age-standardized | Uterine cancer  | Rate | 87.87574002 |
| DALYs (Disabi Ireland)                  | Age-standardized | Cervical cancer | Rate | 90.29859467 |
| DALYs (Disabi Ireland)                  | Age-standardized | Uterine cancer  | Rate | 65.55381445 |
| DALYs (Disabi Ireland)                  | Age-standardized | Ovarian cancer  | Rate | 197.8995412 |
| DALYs (Disabi Barbados)                 | Age-standardized | Breast cancer   | Rate | 999.71467   |
| DALYs (Disabi Barbados)                 | Age-standardized | Cervical cancer | Rate | 388.5629376 |

|                                                      |                  |                 |      |             |
|------------------------------------------------------|------------------|-----------------|------|-------------|
| DALYs (Disabi Barbados)                              | Age-standardized | Uterine cancer  | Rate | 186.6589516 |
| DALYs (Disabi Sri Lanka)                             | Age-standardized | Ovarian cancer  | Rate | 92.54902803 |
| DALYs (Disabi Liberia)                               | Age-standardized | Ovarian cancer  | Rate | 100.2616508 |
| DALYs (Disabi United States of America)              | Age-standardized | Ovarian cancer  | Rate | 157.747758  |
| DALYs (Disabi Northern Mariana Islands)              | Age-standardized | Breast cancer   | Rate | 772.9555089 |
| DALYs (Disabi Northern Mariana Islands)              | Age-standardized | Cervical cancer | Rate | 461.6268293 |
| DALYs (Disabi Northern Mariana Islands)              | Age-standardized | Uterine cancer  | Rate | 207.3435233 |
| DALYs (Disabi Montenegro)                            | Age-standardized | Ovarian cancer  | Rate | 166.1486618 |
| DALYs (Disabi Democratic People's Republic of Korea) | Age-standardized | Ovarian cancer  | Rate | 84.1311424  |
| DALYs (Disabi Tokelau)                               | Age-standardized | Breast cancer   | Rate | 1006.955532 |
| DALYs (Disabi Tokelau)                               | Age-standardized | Cervical cancer | Rate | 508.5850951 |
| DALYs (Disabi Tokelau)                               | Age-standardized | Uterine cancer  | Rate | 154.8643172 |
| DALYs (Disabi Bahamas)                               | Age-standardized | Breast cancer   | Rate | 1087.226266 |
| DALYs (Disabi Bahamas)                               | Age-standardized | Cervical cancer | Rate | 354.2824551 |
| DALYs (Disabi Bahamas)                               | Age-standardized | Uterine cancer  | Rate | 139.6714645 |
| DALYs (Disabi Sri Lanka)                             | Age-standardized | Breast cancer   | Rate | 345.0086456 |
| DALYs (Disabi Sri Lanka)                             | Age-standardized | Cervical cancer | Rate | 100.9961037 |
| DALYs (Disabi Sri Lanka)                             | Age-standardized | Uterine cancer  | Rate | 41.62441042 |
| DALYs (Disabi Guam)                                  | Age-standardized | Ovarian cancer  | Rate | 114.0134545 |
| DALYs (Disabi Tuvalu)                                | Age-standardized | Breast cancer   | Rate | 1042.579393 |
| DALYs (Disabi Tuvalu)                                | Age-standardized | Cervical cancer | Rate | 536.1445533 |
| DALYs (Disabi Tuvalu)                                | Age-standardized | Uterine cancer  | Rate | 150.2862483 |
| DALYs (Disabi Sudan)                                 | Age-standardized | Breast cancer   | Rate | 416.4201479 |
| DALYs (Disabi Jamaica)                               | Age-standardized | Breast cancer   | Rate | 911.2490931 |
| DALYs (Disabi Jamaica)                               | Age-standardized | Cervical cancer | Rate | 511.6469098 |
| DALYs (Disabi Jamaica)                               | Age-standardized | Uterine cancer  | Rate | 165.0978358 |
| DALYs (Disabi Turkey)                                | Age-standardized | Breast cancer   | Rate | 369.8446992 |
| DALYs (Disabi Turkey)                                | Age-standardized | Cervical cancer | Rate | 61.83610362 |
| DALYs (Disabi Turkey)                                | Age-standardized | Uterine cancer  | Rate | 53.88554941 |
| DALYs (Disabi American Samoa)                        | Age-standardized | Ovarian cancer  | Rate | 278.7337085 |
| DALYs (Disabi Ethiopia)                              | Age-standardized | Ovarian cancer  | Rate | 117.3980159 |
| DALYs (Disabi Burkina Faso)                          | Age-standardized | Breast cancer   | Rate | 566.51387   |
| DALYs (Disabi Burkina Faso)                          | Age-standardized | Cervical cancer | Rate | 698.9534143 |
| DALYs (Disabi Burkina Faso)                          | Age-standardized | Uterine cancer  | Rate | 55.11720106 |
| DALYs (Disabi Grenada)                               | Age-standardized | Ovarian cancer  | Rate | 216.5234743 |
| DALYs (Disabi Democratic People's Republic of Korea) | Age-standardized | Breast cancer   | Rate | 426.5674612 |
| DALYs (Disabi Greece)                                | Age-standardized | Ovarian cancer  | Rate | 158.1347515 |
| DALYs (Disabi Niger)                                 | Age-standardized | Cervical cancer | Rate | 711.5250307 |
| DALYs (Disabi Niger)                                 | Age-standardized | Uterine cancer  | Rate | 48.87095745 |
| DALYs (Disabi Niger)                                 | Age-standardized | Ovarian cancer  | Rate | 49.53880961 |
| DALYs (Disabi Zambia)                                | Age-standardized | Ovarian cancer  | Rate | 167.9078236 |
| DALYs (Disabi Angola)                                | Age-standardized | Ovarian cancer  | Rate | 73.37045007 |
| DALYs (Disabi United Republic of Tanzania)           | Age-standardized | Ovarian cancer  | Rate | 151.669373  |
| DALYs (Disabi American Samoa)                        | Age-standardized | Breast cancer   | Rate | 890.8135962 |
| DALYs (Disabi American Samoa)                        | Age-standardized | Cervical cancer | Rate | 287.21072   |
| DALYs (Disabi American Samoa)                        | Age-standardized | Uterine cancer  | Rate | 285.4055742 |
| DALYs (Disabi Guyana)                                | Age-standardized | Breast cancer   | Rate | 766.2182698 |
| DALYs (Disabi Guyana)                                | Age-standardized | Cervical cancer | Rate | 683.1402242 |
| DALYs (Disabi Guyana)                                | Age-standardized | Uterine cancer  | Rate | 184.3469288 |
| DALYs (Disabi Israel)                                | Age-standardized | Ovarian cancer  | Rate | 153.7408083 |
| DALYs (Disabi Democratic People's Republic of Korea) | Age-standardized | Cervical cancer | Rate | 279.5573335 |
| DALYs (Disabi Democratic People's Republic of Korea) | Age-standardized | Uterine cancer  | Rate | 63.84344581 |
| DALYs (Disabi Lebanon)                               | Age-standardized | Breast cancer   | Rate | 1066.954105 |
| DALYs (Disabi Guyana)                                | Age-standardized | Ovarian cancer  | Rate | 247.6338799 |
| DALYs (Disabi Niger)                                 | Age-standardized | Breast cancer   | Rate | 315.1571376 |
| DALYs (Disabi Colombia)                              | Age-standardized | Breast cancer   | Rate | 360.924658  |
| DALYs (Disabi Colombia)                              | Age-standardized | Cervical cancer | Rate | 265.4999339 |
| DALYs (Disabi Colombia)                              | Age-standardized | Uterine cancer  | Rate | 38.94841749 |

|                                                 |                  |                 |      |             |
|-------------------------------------------------|------------------|-----------------|------|-------------|
| DALYs (Disabi Niue)                             | Age-standardized | Breast cancer   | Rate | 872.2395475 |
| DALYs (Disabi Niue)                             | Age-standardized | Cervical cancer | Rate | 333.9566021 |
| DALYs (Disabi Niue)                             | Age-standardized | Uterine cancer  | Rate | 126.1295912 |
| DALYs (Disabi Jordan)                           | Age-standardized | Breast cancer   | Rate | 583.5729255 |
| DALYs (Disabi Jordan)                           | Age-standardized | Cervical cancer | Rate | 55.24808984 |
| DALYs (Disabi Jordan)                           | Age-standardized | Uterine cancer  | Rate | 48.39428394 |
| DALYs (Disabi Sweden)                           | Age-standardized | Ovarian cancer  | Rate | 157.1692328 |
| DALYs (Disabi Indonesia)                        | Age-standardized | Breast cancer   | Rate | 704.6979142 |
| DALYs (Disabi Indonesia)                        | Age-standardized | Cervical cancer | Rate | 216.8703525 |
| DALYs (Disabi Guatemala)                        | Age-standardized | Breast cancer   | Rate | 306.5892625 |
| DALYs (Disabi Palau)                            | Age-standardized | Breast cancer   | Rate | 972.6922906 |
| DALYs (Disabi Palau)                            | Age-standardized | Cervical cancer | Rate | 896.4367432 |
| DALYs (Disabi Palau)                            | Age-standardized | Uterine cancer  | Rate | 14.0745499  |
| DALYs (Disabi Palau)                            | Age-standardized | Ovarian cancer  | Rate | 80.99365076 |
| DALYs (Disabi Bahamas)                          | Age-standardized | Ovarian cancer  | Rate | 218.315555  |
| DALYs (Disabi Tokelau)                          | Age-standardized | Ovarian cancer  | Rate | 114.1350906 |
| DALYs (Disabi United Kingdom)                   | Age-standardized | Breast cancer   | Rate | 613.7783565 |
| DALYs (Disabi United Kingdom)                   | Age-standardized | Cervical cancer | Rate | 90.25644893 |
| DALYs (Disabi United Kingdom)                   | Age-standardized | Uterine cancer  | Rate | 74.20116979 |
| DALYs (Disabi Australia)                        | Age-standardized | Ovarian cancer  | Rate | 124.2873694 |
| DALYs (Disabi Colombia)                         | Age-standardized | Ovarian cancer  | Rate | 136.9088642 |
| DALYs (Disabi Cameroon)                         | Age-standardized | Breast cancer   | Rate | 618.7724895 |
| DALYs (Disabi Cameroon)                         | Age-standardized | Cervical cancer | Rate | 635.1578323 |
| DALYs (Disabi Cameroon)                         | Age-standardized | Uterine cancer  | Rate | 63.7116204  |
| DALYs (Disabi Cameroon)                         | Age-standardized | Ovarian cancer  | Rate | 114.7497875 |
| DALYs (Disabi Mali)                             | Age-standardized | Ovarian cancer  | Rate | 57.64040609 |
| DALYs (Disabi United Kingdom)                   | Age-standardized | Ovarian cancer  | Rate | 191.439697  |
| DALYs (Disabi Tonga)                            | Age-standardized | Ovarian cancer  | Rate | 116.3689718 |
| DALYs (Disabi Andorra)                          | Age-standardized | Ovarian cancer  | Rate | 116.1497478 |
| DALYs (Disabi Costa Rica)                       | Age-standardized | Breast cancer   | Rate | 432.5238603 |
| DALYs (Disabi Costa Rica)                       | Age-standardized | Cervical cancer | Rate | 222.0447782 |
| DALYs (Disabi Costa Rica)                       | Age-standardized | Uterine cancer  | Rate | 59.70256546 |
| DALYs (Disabi Nauru)                            | Age-standardized | Ovarian cancer  | Rate | 140.7954767 |
| DALYs (Disabi Thailand)                         | Age-standardized | Breast cancer   | Rate | 394.5783079 |
| DALYs (Disabi Thailand)                         | Age-standardized | Cervical cancer | Rate | 205.2891381 |
| DALYs (Disabi Thailand)                         | Age-standardized | Uterine cancer  | Rate | 31.39819553 |
| DALYs (Disabi Bermuda)                          | Age-standardized | Cervical cancer | Rate | 93.43985087 |
| DALYs (Disabi Bermuda)                          | Age-standardized | Uterine cancer  | Rate | 76.22558238 |
| DALYs (Disabi Bermuda)                          | Age-standardized | Ovarian cancer  | Rate | 164.1988684 |
| DALYs (Disabi United Arab Emirates)             | Age-standardized | Breast cancer   | Rate | 790.9777657 |
| DALYs (Disabi United Arab Emirates)             | Age-standardized | Cervical cancer | Rate | 168.6165172 |
| DALYs (Disabi United Arab Emirates)             | Age-standardized | Uterine cancer  | Rate | 38.63187532 |
| DALYs (Disabi Turkmenistan)                     | Age-standardized | Breast cancer   | Rate | 427.3999156 |
| DALYs (Disabi Brazil)                           | Age-standardized | Ovarian cancer  | Rate | 116.135008  |
| DALYs (Disabi Mongolia)                         | Age-standardized | Breast cancer   | Rate | 292.7239542 |
| DALYs (Disabi Mongolia)                         | Age-standardized | Cervical cancer | Rate | 363.4905092 |
| DALYs (Disabi Mongolia)                         | Age-standardized | Uterine cancer  | Rate | 66.24694353 |
| DALYs (Disabi Eritrea)                          | Age-standardized | Breast cancer   | Rate | 644.0830206 |
| DALYs (Disabi Cabo Verde)                       | Age-standardized | Ovarian cancer  | Rate | 76.08347037 |
| DALYs (Disabi Indonesia)                        | Age-standardized | Uterine cancer  | Rate | 76.18473298 |
| DALYs (Disabi Indonesia)                        | Age-standardized | Ovarian cancer  | Rate | 153.6746656 |
| DALYs (Disabi Saint Lucia)                      | Age-standardized | Breast cancer   | Rate | 637.4117913 |
| DALYs (Disabi Saint Lucia)                      | Age-standardized | Cervical cancer | Rate | 426.9700265 |
| DALYs (Disabi North Macedonia)                  | Age-standardized | Breast cancer   | Rate | 744.5413477 |
| DALYs (Disabi North Macedonia)                  | Age-standardized | Cervical cancer | Rate | 190.8400241 |
| DALYs (Disabi North Macedonia)                  | Age-standardized | Uterine cancer  | Rate | 135.6834799 |
| DALYs (Disabi Nigeria)                          | Age-standardized | Ovarian cancer  | Rate | 90.72389574 |
| DALYs (Disabi Saint Vincent and the Grenadines) | Age-standardized | Breast cancer   | Rate | 891.931253  |

|                                                 |                  |                 |      |             |
|-------------------------------------------------|------------------|-----------------|------|-------------|
| DALYs (Disabi Saint Vincent and the Grenadines) | Age-standardized | Cervical cancer | Rate | 653.6073299 |
| DALYs (Disabi Saint Vincent and the Grenadines) | Age-standardized | Uterine cancer  | Rate | 205.6819829 |
| DALYs (Disabi Saint Lucia)                      | Age-standardized | Uterine cancer  | Rate | 117.5638343 |
| DALYs (Disabi Saint Lucia)                      | Age-standardized | Ovarian cancer  | Rate | 177.5755028 |
| DALYs (Disabi United Arab Emirates)             | Age-standardized | Ovarian cancer  | Rate | 163.1314028 |
| DALYs (Disabi Peru)                             | Age-standardized | Ovarian cancer  | Rate | 134.3387539 |
| DALYs (Disabi Libya)                            | Age-standardized | Breast cancer   | Rate | 550.4624682 |
| DALYs (Disabi Libya)                            | Age-standardized | Cervical cancer | Rate | 124.016138  |
| DALYs (Disabi Libya)                            | Age-standardized | Uterine cancer  | Rate | 47.00037949 |
| DALYs (Disabi Costa Rica)                       | Age-standardized | Ovarian cancer  | Rate | 107.8583165 |
| DALYs (Disabi Argentina)                        | Age-standardized | Ovarian cancer  | Rate | 165.4096676 |
| DALYs (Disabi Vanuatu)                          | Age-standardized | Ovarian cancer  | Rate | 87.76037056 |
| DALYs (Disabi Burkina Faso)                     | Age-standardized | Ovarian cancer  | Rate | 74.97077098 |
| DALYs (Disabi Puerto Rico)                      | Age-standardized | Cervical cancer | Rate | 124.5872132 |
| DALYs (Disabi Niue)                             | Age-standardized | Ovarian cancer  | Rate | 142.1833493 |
| DALYs (Disabi Honduras)                         | Age-standardized | Breast cancer   | Rate | 380.016534  |
| DALYs (Disabi Honduras)                         | Age-standardized | Cervical cancer | Rate | 343.7329994 |
| DALYs (Disabi Honduras)                         | Age-standardized | Uterine cancer  | Rate | 108.1365641 |
| DALYs (Disabi Kuwait)                           | Age-standardized | Breast cancer   | Rate | 358.8442246 |
| DALYs (Disabi Kuwait)                           | Age-standardized | Cervical cancer | Rate | 44.34094027 |
| DALYs (Disabi Switzerland)                      | Age-standardized | Ovarian cancer  | Rate | 128.32449   |
| DALYs (Disabi Tuvalu)                           | Age-standardized | Ovarian cancer  | Rate | 131.4670299 |
| DALYs (Disabi South Sudan)                      | Age-standardized | Breast cancer   | Rate | 358.4631097 |
| DALYs (Disabi South Sudan)                      | Age-standardized | Cervical cancer | Rate | 566.6392845 |
| DALYs (Disabi South Sudan)                      | Age-standardized | Uterine cancer  | Rate | 56.85598535 |
| DALYs (Disabi Mauritania)                       | Age-standardized | Ovarian cancer  | Rate | 108.2583383 |
| DALYs (Disabi Haiti)                            | Age-standardized | Ovarian cancer  | Rate | 100.4460343 |
| DALYs (Disabi Taiwan (Province of China))       | Age-standardized | Breast cancer   | Rate | 385.9604504 |
| DALYs (Disabi Taiwan (Province of China))       | Age-standardized | Cervical cancer | Rate | 133.3381224 |
| DALYs (Disabi Taiwan (Province of China))       | Age-standardized | Uterine cancer  | Rate | 51.8770367  |
| DALYs (Disabi United States Virgin Islands)     | Age-standardized | Breast cancer   | Rate | 754.9005886 |
| DALYs (Disabi United States Virgin Islands)     | Age-standardized | Cervical cancer | Rate | 223.8798521 |
| DALYs (Disabi United States Virgin Islands)     | Age-standardized | Uterine cancer  | Rate | 96.75716761 |
| DALYs (Disabi Kuwait)                           | Age-standardized | Uterine cancer  | Rate | 49.04832386 |
| DALYs (Disabi Kuwait)                           | Age-standardized | Ovarian cancer  | Rate | 95.12939616 |
| DALYs (Disabi South Sudan)                      | Age-standardized | Ovarian cancer  | Rate | 108.8531462 |
| DALYs (Disabi Taiwan (Province of China))       | Age-standardized | Ovarian cancer  | Rate | 116.5289944 |
| DALYs (Disabi Algeria)                          | Age-standardized | Breast cancer   | Rate | 419.2684564 |
| DALYs (Disabi Algeria)                          | Age-standardized | Cervical cancer | Rate | 133.1621134 |
| DALYs (Disabi Algeria)                          | Age-standardized | Uterine cancer  | Rate | 16.76140154 |
| DALYs (Disabi El Salvador)                      | Age-standardized | Breast cancer   | Rate | 327.7204454 |
| DALYs (Disabi El Salvador)                      | Age-standardized | Cervical cancer | Rate | 463.1046826 |
| DALYs (Disabi El Salvador)                      | Age-standardized | Uterine cancer  | Rate | 55.96877444 |
| DALYs (Disabi El Salvador)                      | Age-standardized | Ovarian cancer  | Rate | 117.386623  |
| DALYs (Disabi Sudan)                            | Age-standardized | Ovarian cancer  | Rate | 63.39513814 |
| DALYs (Disabi Tajikistan)                       | Age-standardized | Breast cancer   | Rate | 450.238502  |
| DALYs (Disabi Barbados)                         | Age-standardized | Ovarian cancer  | Rate | 180.5333859 |
| DALYs (Disabi Yemen)                            | Age-standardized | Cervical cancer | Rate | 117.5663468 |
| DALYs (Disabi Yemen)                            | Age-standardized | Uterine cancer  | Rate | 25.74402032 |
| DALYs (Disabi Thailand)                         | Age-standardized | Ovarian cancer  | Rate | 113.0566895 |
| DALYs (Disabi Brazil)                           | Age-standardized | Breast cancer   | Rate | 449.4409759 |
| DALYs (Disabi Brazil)                           | Age-standardized | Cervical cancer | Rate | 268.0006953 |
| DALYs (Disabi Brazil)                           | Age-standardized | Uterine cancer  | Rate | 56.77983152 |
| DALYs (Disabi United States Virgin Islands)     | Age-standardized | Ovarian cancer  | Rate | 262.2690775 |
| DALYs (Disabi Montenegro)                       | Age-standardized | Breast cancer   | Rate | 773.2941924 |
| DALYs (Disabi Montenegro)                       | Age-standardized | Cervical cancer | Rate | 161.3679681 |
| DALYs (Disabi Montenegro)                       | Age-standardized | Uterine cancer  | Rate | 79.44597197 |
| DALYs (Disabi Northern Mariana Islands)         | Age-standardized | Ovarian cancer  | Rate | 126.2592005 |

|                                               |                  |                 |      |             |
|-----------------------------------------------|------------------|-----------------|------|-------------|
| DALYs (DisabiSao Tome and Principe            | Age-standardized | Ovarian cancer  | Rate | 201.5577556 |
| DALYs (DisabiRepublic of Moldova              | Age-standardized | Breast cancer   | Rate | 459.8931886 |
| DALYs (DisabiRepublic of Moldova              | Age-standardized | Cervical cancer | Rate | 218.9583108 |
| DALYs (DisabiRepublic of Moldova              | Age-standardized | Uterine cancer  | Rate | 83.96175481 |
| DALYs (DisabiGuatemala                        | Age-standardized | Cervical cancer | Rate | 559.0640621 |
| DALYs (DisabiGuatemala                        | Age-standardized | Uterine cancer  | Rate | 68.73980637 |
| DALYs (DisabiTajikistan                       | Age-standardized | Cervical cancer | Rate | 136.3858172 |
| DALYs (DisabiTajikistan                       | Age-standardized | Uterine cancer  | Rate | 112.1392093 |
| DALYs (DisabiTajikistan                       | Age-standardized | Ovarian cancer  | Rate | 115.7668355 |
| DALYs (DisabiSuriname                         | Age-standardized | Breast cancer   | Rate | 556.8280737 |
| DALYs (DisabiSuriname                         | Age-standardized | Cervical cancer | Rate | 543.4551096 |
| DALYs (DisabiSuriname                         | Age-standardized | Uterine cancer  | Rate | 69.225122   |
| DALYs (DisabiViet Nam                         | Age-standardized | Breast cancer   | Rate | 653.3610476 |
| DALYs (DisabiSaint Vincent and the Grenadines | Age-standardized | Ovarian cancer  | Rate | 178.3344339 |
| DALYs (DisabiGuatemala                        | Age-standardized | Ovarian cancer  | Rate | 96.41710377 |
| DALYs (DisabiEthiopia                         | Age-standardized | Breast cancer   | Rate | 466.5717543 |
| DALYs (DisabiEthiopia                         | Age-standardized | Cervical cancer | Rate | 497.9436926 |
| DALYs (DisabiEthiopia                         | Age-standardized | Uterine cancer  | Rate | 42.67045436 |
| DALYs (DisabiTimor-Leste                      | Age-standardized | Breast cancer   | Rate | 491.2076975 |
| DALYs (DisabiTimor-Leste                      | Age-standardized | Cervical cancer | Rate | 278.9410368 |
| DALYs (DisabiTimor-Leste                      | Age-standardized | Uterine cancer  | Rate | 75.83301425 |
| DALYs (DisabiBahrain                          | Age-standardized | Breast cancer   | Rate | 668.3430986 |
| DALYs (DisabiBahrain                          | Age-standardized | Cervical cancer | Rate | 74.42357461 |
| DALYs (DisabiBahrain                          | Age-standardized | Uterine cancer  | Rate | 54.07688371 |
| DALYs (DisabiUzbekistan                       | Age-standardized | Breast cancer   | Rate | 535.9523766 |
| DALYs (DisabiUzbekistan                       | Age-standardized | Cervical cancer | Rate | 276.8507425 |
| DALYs (DisabiUzbekistan                       | Age-standardized | Uterine cancer  | Rate | 81.08431459 |
| DALYs (DisabiMorocco                          | Age-standardized | Breast cancer   | Rate | 842.511459  |
| DALYs (DisabiMorocco                          | Age-standardized | Cervical cancer | Rate | 236.5127694 |
| DALYs (DisabiMorocco                          | Age-standardized | Uterine cancer  | Rate | 42.85785525 |
| DALYs (DisabiTonga                            | Age-standardized | Breast cancer   | Rate | 953.961714  |
| DALYs (DisabiTonga                            | Age-standardized | Cervical cancer | Rate | 504.2699355 |
| DALYs (DisabiTonga                            | Age-standardized | Uterine cancer  | Rate | 96.38350965 |
| DALYs (DisabiAlbania                          | Age-standardized | Breast cancer   | Rate | 375.4941171 |
| DALYs (DisabiPalestine                        | Age-standardized | Breast cancer   | Rate | 738.916044  |
| DALYs (DisabiPalestine                        | Age-standardized | Cervical cancer | Rate | 69.82851018 |
| DALYs (DisabiPalestine                        | Age-standardized | Uterine cancer  | Rate | 99.51259939 |
| DALYs (DisabiJamaica                          | Age-standardized | Ovarian cancer  | Rate | 157.0439797 |
| DALYs (DisabiTimor-Leste                      | Age-standardized | Ovarian cancer  | Rate | 110.3408492 |
| DALYs (DisabiYemen                            | Age-standardized | Ovarian cancer  | Rate | 56.52996371 |
| DALYs (DisabiMorocco                          | Age-standardized | Ovarian cancer  | Rate | 156.6560684 |
| DALYs (DisabiSuriname                         | Age-standardized | Ovarian cancer  | Rate | 178.4139626 |
| DALYs (DisabiLebanon                          | Age-standardized | Cervical cancer | Rate | 71.83175742 |
| DALYs (DisabiLebanon                          | Age-standardized | Uterine cancer  | Rate | 62.09807105 |
| DALYs (DisabiRussian Federation               | Age-standardized | Breast cancer   | Rate | 509.2921706 |
| DALYs (DisabiRussian Federation               | Age-standardized | Cervical cancer | Rate | 199.8726838 |
| DALYs (DisabiRussian Federation               | Age-standardized | Uterine cancer  | Rate | 115.4662637 |
| DALYs (DisabiLebanon                          | Age-standardized | Ovarian cancer  | Rate | 201.4876233 |
| DALYs (DisabiParaguay                         | Age-standardized | Breast cancer   | Rate | 528.3665278 |
| DALYs (DisabiParaguay                         | Age-standardized | Cervical cancer | Rate | 535.0893542 |
| DALYs (DisabiParaguay                         | Age-standardized | Uterine cancer  | Rate | 77.9658753  |
| DALYs (DisabiHonduras                         | Age-standardized | Ovarian cancer  | Rate | 115.5135574 |
| DALYs (DisabiBangladesh                       | Age-standardized | Breast cancer   | Rate | 450.2364344 |
| DALYs (DisabiBangladesh                       | Age-standardized | Cervical cancer | Rate | 180.4208954 |
| DALYs (DisabiBangladesh                       | Age-standardized | Uterine cancer  | Rate | 22.14754853 |
| DALYs (DisabiArmenia                          | Age-standardized | Breast cancer   | Rate | 704.484316  |
| DALYs (DisabiArmenia                          | Age-standardized | Cervical cancer | Rate | 222.3303663 |
| DALYs (DisabiArmenia                          | Age-standardized | Uterine cancer  | Rate | 98.82665736 |



|                                         |                  |                 |      |             |
|-----------------------------------------|------------------|-----------------|------|-------------|
| DALYs (Disabi Yemen)                    | Age-standardized | Breast cancer   | Rate | 434.074198  |
| DALYs (Disabi Turkmenistan)             | Age-standardized | Cervical cancer | Rate | 250.3988805 |
| DALYs (Disabi Turkmenistan)             | Age-standardized | Uterine cancer  | Rate | 26.0712609  |
| DALYs (Disabi Congo)                    | Age-standardized | Breast cancer   | Rate | 837.9378059 |
| DALYs (Disabi Congo)                    | Age-standardized | Cervical cancer | Rate | 751.5667398 |
| DALYs (Disabi Congo)                    | Age-standardized | Uterine cancer  | Rate | 68.1509966  |
| DALYs (Disabi Russian Federation)       | Age-standardized | Ovarian cancer  | Rate | 204.2015403 |
| DALYs (Disabi Andorra)                  | Age-standardized | Breast cancer   | Rate | 505.3690592 |
| DALYs (Disabi Andorra)                  | Age-standardized | Cervical cancer | Rate | 121.9964905 |
| DALYs (Disabi Andorra)                  | Age-standardized | Uterine cancer  | Rate | 71.11449325 |
| DALYs (Disabi Turkmenistan)             | Age-standardized | Ovarian cancer  | Rate | 108.6425778 |
| DALYs (Disabi Oman)                     | Age-standardized | Breast cancer   | Rate | 434.8267916 |
| DALYs (Disabi Oman)                     | Age-standardized | Cervical cancer | Rate | 78.00773941 |
| DALYs (Disabi Oman)                     | Age-standardized | Uterine cancer  | Rate | 22.27606863 |
| DALYs (Disabi Kenya)                    | Age-standardized | Breast cancer   | Rate | 480.0453675 |
| DALYs (Disabi Kenya)                    | Age-standardized | Cervical cancer | Rate | 395.3048801 |
| DALYs (Disabi Poland)                   | Age-standardized | Breast cancer   | Rate | 525.269393  |
| DALYs (Disabi Poland)                   | Age-standardized | Cervical cancer | Rate | 178.2421035 |
| DALYs (Disabi Poland)                   | Age-standardized | Uterine cancer  | Rate | 100.6183534 |
| DALYs (Disabi Romania)                  | Age-standardized | Breast cancer   | Rate | 538.8675826 |
| DALYs (Disabi Romania)                  | Age-standardized | Cervical cancer | Rate | 364.4793529 |
| DALYs (Disabi Romania)                  | Age-standardized | Uterine cancer  | Rate | 81.01984007 |
| DALYs (Disabi Angola)                   | Age-standardized | Breast cancer   | Rate | 558.1185149 |
| DALYs (Disabi Angola)                   | Age-standardized | Cervical cancer | Rate | 618.6944462 |
| DALYs (Disabi Angola)                   | Age-standardized | Uterine cancer  | Rate | 48.35094744 |
| DALYs (Disabi Poland)                   | Age-standardized | Ovarian cancer  | Rate | 246.4905376 |
| DALYs (Disabi Kenya)                    | Age-standardized | Uterine cancer  | Rate | 34.08932789 |
| DALYs (Disabi Kenya)                    | Age-standardized | Ovarian cancer  | Rate | 133.9920327 |
| DALYs (Disabi Fiji)                     | Age-standardized | Breast cancer   | Rate | 1074.442768 |
| DALYs (Disabi Fiji)                     | Age-standardized | Cervical cancer | Rate | 680.1336745 |
| DALYs (Disabi Fiji)                     | Age-standardized | Uterine cancer  | Rate | 125.5852666 |
| DALYs (Disabi Fiji)                     | Age-standardized | Ovarian cancer  | Rate | 56.9861345  |
| DALYs (Disabi Paraguay)                 | Age-standardized | Ovarian cancer  | Rate | 106.7089259 |
| DALYs (Disabi Vanuatu)                  | Age-standardized | Breast cancer   | Rate | 817.5754459 |
| DALYs (Disabi Vanuatu)                  | Age-standardized | Cervical cancer | Rate | 544.482377  |
| DALYs (Disabi Cambodia)                 | Age-standardized | Ovarian cancer  | Rate | 161.4359372 |
| DALYs (Disabi Libya)                    | Age-standardized | Ovarian cancer  | Rate | 141.3973731 |
| DALYs (Disabi Viet Nam)                 | Age-standardized | Cervical cancer | Rate | 248.9444029 |
| DALYs (Disabi Viet Nam)                 | Age-standardized | Uterine cancer  | Rate | 32.31566549 |
| DALYs (Disabi Austria)                  | Age-standardized | Breast cancer   | Rate | 472.2780356 |
| DALYs (Disabi Austria)                  | Age-standardized | Cervical cancer | Rate | 76.50937863 |
| DALYs (Disabi Vanuatu)                  | Age-standardized | Uterine cancer  | Rate | 138.7713115 |
| DALYs (Disabi Viet Nam)                 | Age-standardized | Ovarian cancer  | Rate | 120.9812447 |
| DALYs (Disabi Ukraine)                  | Age-standardized | Breast cancer   | Rate | 620.1008818 |
| DALYs (Disabi Ukraine)                  | Age-standardized | Cervical cancer | Rate | 171.48658   |
| DALYs (Disabi Ukraine)                  | Age-standardized | Uterine cancer  | Rate | 109.7781666 |
| DALYs (Disabi Palestine)                | Age-standardized | Ovarian cancer  | Rate | 125.7692608 |
| DALYs (Disabi Ukraine)                  | Age-standardized | Ovarian cancer  | Rate | 203.8051897 |
| DALYs (Disabi Austria)                  | Age-standardized | Uterine cancer  | Rate | 52.82048395 |
| DALYs (Disabi Austria)                  | Age-standardized | Ovarian cancer  | Rate | 145.9921374 |
| DALYs (Disabi Central African Republic) | Age-standardized | Breast cancer   | Rate | 593.1680308 |
| DALYs (Disabi Central African Republic) | Age-standardized | Cervical cancer | Rate | 955.2542494 |
| DALYs (Disabi Central African Republic) | Age-standardized | Uterine cancer  | Rate | 56.27481638 |
| DALYs (Disabi Uzbekistan)               | Age-standardized | Ovarian cancer  | Rate | 106.8571315 |
| DALYs (Disabi Central African Republic) | Age-standardized | Ovarian cancer  | Rate | 64.29829219 |
| DALYs (Disabi Madagascar)               | Age-standardized | Breast cancer   | Rate | 495.4112963 |
| DALYs (Disabi Madagascar)               | Age-standardized | Cervical cancer | Rate | 718.8996213 |
| DALYs (Disabi Madagascar)               | Age-standardized | Uterine cancer  | Rate | 58.99618637 |

|                                                 |                  |                 |      |             |
|-------------------------------------------------|------------------|-----------------|------|-------------|
| DALYs (Disabi Cabo Verde)                       | Age-standardized | Breast cancer   | Rate | 402.0795382 |
| DALYs (Disabi Cabo Verde)                       | Age-standardized | Cervical cancer | Rate | 365.1319893 |
| DALYs (Disabi Cabo Verde)                       | Age-standardized | Uterine cancer  | Rate | 68.59186563 |
| DALYs (Disabi Romania)                          | Age-standardized | Ovarian cancer  | Rate | 188.2872645 |
| DALYs (Disabi Argentina)                        | Age-standardized | Breast cancer   | Rate | 749.0292867 |
| DALYs (Disabi Argentina)                        | Age-standardized | Cervical cancer | Rate | 366.909381  |
| DALYs (Disabi Argentina)                        | Age-standardized | Uterine cancer  | Rate | 61.79862907 |
| DALYs (Disabi Madagascar)                       | Age-standardized | Ovarian cancer  | Rate | 114.5947285 |
| DALYs (Disabi Serbia)                           | Age-standardized | Breast cancer   | Rate | 787.7956099 |
| DALYs (Disabi Serbia)                           | Age-standardized | Cervical cancer | Rate | 272.0538464 |
| DALYs (Disabi Serbia)                           | Age-standardized | Uterine cancer  | Rate | 107.5278982 |
| DALYs (Disabi Albania)                          | Age-standardized | Cervical cancer | Rate | 98.41873162 |
| DALYs (Disabi Albania)                          | Age-standardized | Uterine cancer  | Rate | 59.38169563 |
| DALYs (Disabi Albania)                          | Age-standardized | Ovarian cancer  | Rate | 85.52526656 |
| DALYs (Disabi Democratic Republic of the Congo) | Age-standardized | Breast cancer   | Rate | 632.7862582 |
| DALYs (Disabi Democratic Republic of the Congo) | Age-standardized | Cervical cancer | Rate | 683.2130502 |
| DALYs (Disabi Democratic Republic of the Congo) | Age-standardized | Uterine cancer  | Rate | 46.45921146 |
| DALYs (Disabi Zambia)                           | Age-standardized | Breast cancer   | Rate | 553.414585  |
| DALYs (Disabi Zambia)                           | Age-standardized | Cervical cancer | Rate | 861.7035331 |
| DALYs (Disabi Zambia)                           | Age-standardized | Uterine cancer  | Rate | 75.00655136 |
| DALYs (Disabi Congo)                            | Age-standardized | Ovarian cancer  | Rate | 108.8715989 |
| DALYs (Disabi Slovakia)                         | Age-standardized | Breast cancer   | Rate | 509.9471557 |
| DALYs (Disabi Slovakia)                         | Age-standardized | Cervical cancer | Rate | 170.2986113 |
| DALYs (Disabi Slovakia)                         | Age-standardized | Uterine cancer  | Rate | 111.8846963 |
| DALYs (Disabi Oman)                             | Age-standardized | Ovarian cancer  | Rate | 122.100296  |
| DALYs (Disabi Slovakia)                         | Age-standardized | Ovarian cancer  | Rate | 182.121064  |
| DALYs (Disabi Afghanistan)                      | Age-standardized | Breast cancer   | Rate | 506.1909532 |
| DALYs (Disabi Afghanistan)                      | Age-standardized | Cervical cancer | Rate | 238.6444916 |
| DALYs (Disabi Afghanistan)                      | Age-standardized | Uterine cancer  | Rate | 51.1972066  |
| DALYs (Disabi Malawi)                           | Age-standardized | Breast cancer   | Rate | 460.0050377 |
| DALYs (Disabi Malawi)                           | Age-standardized | Cervical cancer | Rate | 820.3325088 |
| DALYs (Disabi Malawi)                           | Age-standardized | Uterine cancer  | Rate | 33.22994349 |
| DALYs (Disabi Serbia)                           | Age-standardized | Ovarian cancer  | Rate | 223.7490286 |
| DALYs (Disabi Chad)                             | Age-standardized | Breast cancer   | Rate | 402.6077839 |
| DALYs (Disabi Chad)                             | Age-standardized | Cervical cancer | Rate | 761.7058986 |
| DALYs (Disabi Chad)                             | Age-standardized | Uterine cancer  | Rate | 55.63746677 |
| DALYs (Disabi Bermuda)                          | Age-standardized | Breast cancer   | Rate | 514.8238878 |
| DALYs (Disabi Chad)                             | Age-standardized | Ovarian cancer  | Rate | 52.54757967 |
| DALYs (Disabi Ireland)                          | Age-standardized | Breast cancer   | Rate | 574.374913  |
| DALYs (Disabi Malawi)                           | Age-standardized | Ovarian cancer  | Rate | 114.8103941 |
| DALYs (Disabi Democratic Republic of the Congo) | Age-standardized | Ovarian cancer  | Rate | 68.0016605  |
| DALYs (Disabi Afghanistan)                      | Age-standardized | Ovarian cancer  | Rate | 85.30511635 |
| DALYs (Disabi Nigeria)                          | Age-standardized | Breast cancer   | Rate | 746.0966187 |
| DALYs (Disabi Nigeria)                          | Age-standardized | Cervical cancer | Rate | 359.8363072 |
| DALYs (Disabi Nigeria)                          | Age-standardized | Uterine cancer  | Rate | 18.04216782 |
| DALYs (Disabi Bosnia and Herzegovina)           | Age-standardized | Ovarian cancer  | Rate | 210.1356722 |
| DALYs (Disabi Botswana)                         | Age-standardized | Breast cancer   | Rate | 792.4549549 |
| DALYs (Disabi Botswana)                         | Age-standardized | Cervical cancer | Rate | 810.030517  |
| DALYs (Disabi Botswana)                         | Age-standardized | Uterine cancer  | Rate | 83.37300258 |
| DALYs (Disabi Lesotho)                          | Age-standardized | Breast cancer   | Rate | 783.952898  |
| DALYs (Disabi Lesotho)                          | Age-standardized | Cervical cancer | Rate | 1087.774299 |
| DALYs (Disabi Lesotho)                          | Age-standardized | Uterine cancer  | Rate | 89.59775829 |
| DALYs (Disabi Botswana)                         | Age-standardized | Ovarian cancer  | Rate | 162.9932515 |
| DALYs (Disabi Equatorial Guinea)                | Age-standardized | Breast cancer   | Rate | 695.4635583 |
| DALYs (Disabi Equatorial Guinea)                | Age-standardized | Cervical cancer | Rate | 508.2955113 |
| DALYs (Disabi Equatorial Guinea)                | Age-standardized | Uterine cancer  | Rate | 54.70685256 |
| DALYs (Disabi Côte d'Ivoire)                    | Age-standardized | Cervical cancer | Rate | 569.2435281 |
| DALYs (Disabi Côte d'Ivoire)                    | Age-standardized | Uterine cancer  | Rate | 52.14994015 |

|                                     |                  |                 |      |             |
|-------------------------------------|------------------|-----------------|------|-------------|
| DALYs (Disabi Sao Tome and Principe | Age-standardized | Breast cancer   | Rate | 591.9741408 |
| DALYs (Disabi Sao Tome and Principe | Age-standardized | Cervical cancer | Rate | 806.1985    |
| DALYs (Disabi Sao Tome and Principe | Age-standardized | Uterine cancer  | Rate | 104.626301  |
| DALYs (Disabi Armenia               | Age-standardized | Ovarian cancer  | Rate | 147.3892435 |
| DALYs (Disabi Algeria               | Age-standardized | Ovarian cancer  | Rate | 76.84077895 |
| DALYs (Disabi Israel                | Age-standardized | Breast cancer   | Rate | 584.5824985 |
| DALYs (Disabi Israel                | Age-standardized | Cervical cancer | Rate | 72.51378959 |
| DALYs (Disabi Israel                | Age-standardized | Uterine cancer  | Rate | 62.25342258 |
| DALYs (Disabi Bangladesh            | Age-standardized | Ovarian cancer  | Rate | 94.54133555 |
| DALYs (Disabi Italy                 | Age-standardized | Breast cancer   | Rate | 530.7787229 |
| DALYs (Disabi Italy                 | Age-standardized | Cervical cancer | Rate | 64.95906432 |
| DALYs (Disabi Italy                 | Age-standardized | Uterine cancer  | Rate | 63.16833331 |
| DALYs (Disabi Lesotho               | Age-standardized | Ovarian cancer  | Rate | 169.1027674 |
| DALYs (Disabi Italy                 | Age-standardized | Ovarian cancer  | Rate | 145.8583161 |

---
